# Supplementary material
Source: PubMed Central journal article supplement (PMC8742597)
Supplement: NIHMS1768692-supplement-Supp_Figures.pdf [file NIHMS1768692-supplement-Supp_Figures.pdf]

# HLA Allele-specific Quantitative Profiling of Type 1 Diabetic B Lymphocyte Immunopeptidome

Putty-Reddy Sudhir, Tai-Du Lin, Qibin Zhang\*

## Figure captions

**Fig S1.** Scatter plots represent the LC-MS/MS data quality of HLA-I immunopeptidomics by pair-wise Pearson correlations ( $r$ ) of five replicate analyses of the HLA-I immunopeptides enriched from 2676 (T1D) and 2675 (HC) B cells.

**Fig S2.** Gibbscluster-2.0 was run separately using the HLA-I and HLA-II immunopeptides of two B cell lines (2676 (T1D) and 2675 (HC)) to identify their consensus binding motif sequences (this data is from Fig. 2E and 3E). The identified motifs were verified with the naturally presented ligand sequences of HLA alleles obtained from Motif viewer.

## Fig S3.

Scatter plots represent the LC-MS/MS data quality of HLA-II immunopeptidomics by pair-wise Pearson correlations ( $r$ ) of five replicate analyses of the HLA-II immunopeptides enriched from 2676 (T1D) and 2675 (HC) B cells.

**Fig. S4. Quantitative composition of cellular functions of the HLA-I and II antigens dysregulated in T1D.** *A*, Proteomap visualization of antigens presented on B cell HLA-I complexes. *B*, Proteomap visualization of antigens presented on B cell HLA-II complexes. The left-side panels show the cellular functions and right-side panels show the antigens associated with those cellular functions. The proteomaps were generated using the antigens, which possess the 2-fold differentially regulated immunopeptides (DIPs) in T1D B cells (2676 (T1D) vs. 2675 (HC), t-test FDR, 0.01). The cellular function regions dominate with the identified antigens whereas the antigen regions were weighted with the number of dysregulated immunopeptides in T1D.

**Fig S5.** List of HLA-I immunopeptides selected for the peptide sequence verification by parallel reaction monitoring (PRM) analysis of spiked stable isotope labelled synthetic peptides.

**Fig S6.** List of HLA-II immunopeptides selected for the peptide sequence verification by parallel reaction monitoring (PRM) analysis of spiked stable isotope labelled synthetic peptides and MixMHC2pred results.

**Fig S7.** The chromatograms represent the HLA-I immunopeptide sequences verified by parallel reaction monitoring (PRM) analysis of endogenous samples spiked stable isotope labelled synthetic peptides. The b or y ions coeluted or interfered with other ions were excluded from the chromatograms.

**Fig S8.** The chromatograms represent the HLA-II immunopeptide sequences verified by parallel reaction monitoring (PRM) analysis of endogenous samples spiked stable isotope labelled synthetic peptides. The b or y ions coeluted or interfered with other ions were excluded from the chromatograms. For some peptides, the HLA-II endogenous peptides identified in two cell lines experiment were compared with SIS peptide fragments by Mirror Plots, which were created using SigmaPlot.

**Fig S9.** Immunopeptides enriched from six additional B cell lines (2679 (HC), 2812 (HC), 2741 (HC), 2678 (T1D), 2765 (T1D), and 3027 (T1D)) were analyzed in two replicates (TR1 and TR2) by LC-MS/MS. Figure S8A shows the number of HLA-I (left panel) and HLA-II (right panel) immunopeptides detected in six B cell lines. Figure S8B represents the length of the HLA-I (left panel) and HLA-II (right panel) immunopeptides identified in six B cell lines listed in Figure 8AB.

**Fig S10.** HLA-I Immunopeptides identified in six B cell lines (2679 (HC), 2812 (HC), 2741 (HC), 2678 (T1D), 2765 (T1D), and 3027 (T1D)) were assigned to HLA allotypes based on their binding affinities to HLA-I alleles (Figure S9A). HLA-II Immunopeptides identified in six B cell lines were assigned to the different HLA allotypes based on their binding affinities to HLA-II alleles (Figure S9B). The binding affinities were predicted using NetMHCpan 4.1 and NetMHCIIpan 4.0 in case of HLA-I and HLA-II, respectively.

**Fig S11.** Gibbscluster-2.0 was run separately using the HLA-I immunopeptides of each of the six B cell lines (2679 (HC), 2812 (HC), 2741 (HC), 2678 (T1D), 2765 (T1D), and 3027 (T1D)) to identify their consensus binding motif sequences. The identified motifs were verified with the naturally presented ligand sequences of HLA alleles obtained from Motif viewer.

**Fig S12.** Gibbscluster-2.0 was run separately using the HLA-II immunopeptides list of each of the six B cell lines (2679 (HC), 2812 (HC), 2741 (HC), 2678 (T1D), 2765 (T1D), and 3027 (T1D)) to identify their consensus binding motif sequences. The identified motifs were verified with the naturally presented ligand sequences of HLA alleles obtained from Motif viewer.

**Fig S13.** LC-MS/MS analysis of HLA-I and HLA-II immunopeptides of T1D and healthy B cells resulted in identification of the peptides that are part of HLA molecules. These peptides were listed along with their information reported by previous studies in IEDB database.

| <b>Figures</b> | <b><u>Page No.</u></b> |
|----------------|------------------------|
| Fig. S1        | 04                     |
| Fig. S2        | 05                     |
| Fig. S3        | 06                     |
| Fig. S4        | 07                     |
| Fig. S5        | 08                     |
| Fig. S6        | 09                     |
| Fig. S7        | 10-37                  |
| Fig. S8        | 38-67                  |
| Fig. S9        | 68                     |
| Fig. S10       | 69                     |
| Fig. S11       | 70                     |
| Fig. S12       | 71                     |
| Fig. S13       | 72                     |

**Fig. S1**

**S1A**

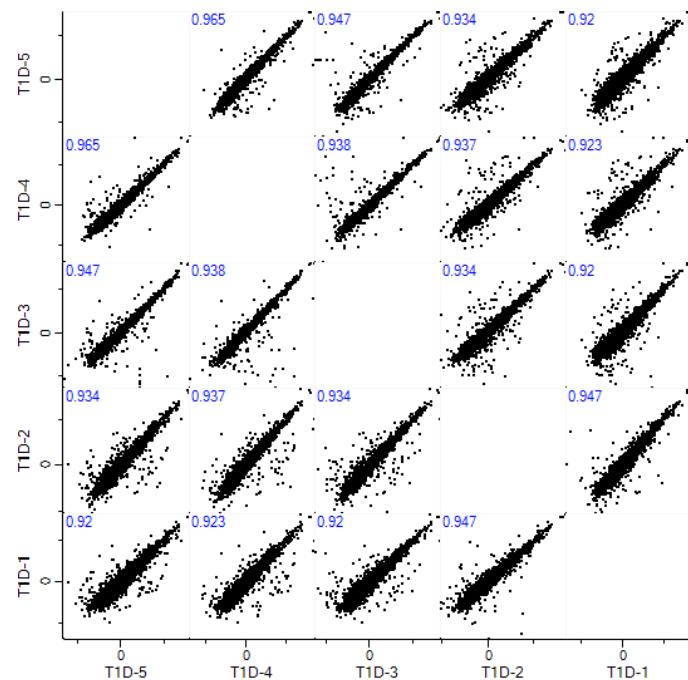

Correlation between five T1D replicates ( $r = 0.92 - 0.965$ )

**S1B**

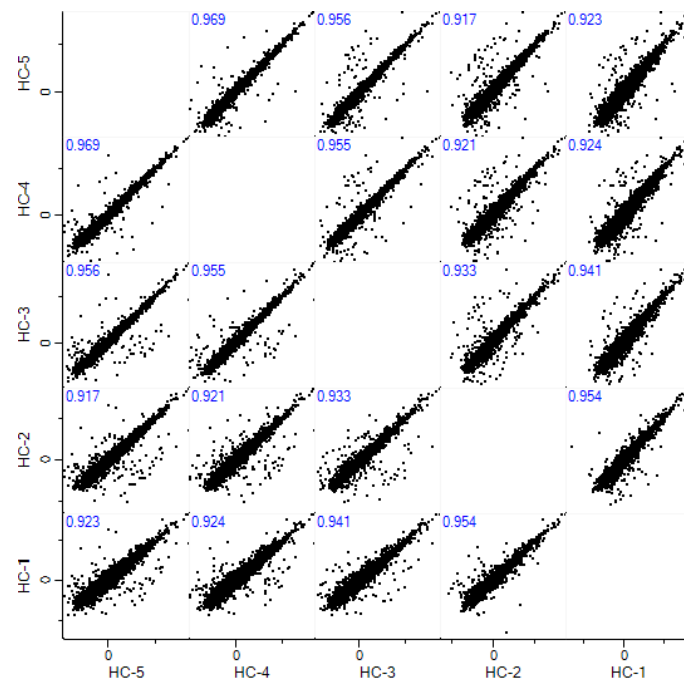

Correlation between five HC replicates ( $r = 0.917 - 0.969$ )

**S1C**

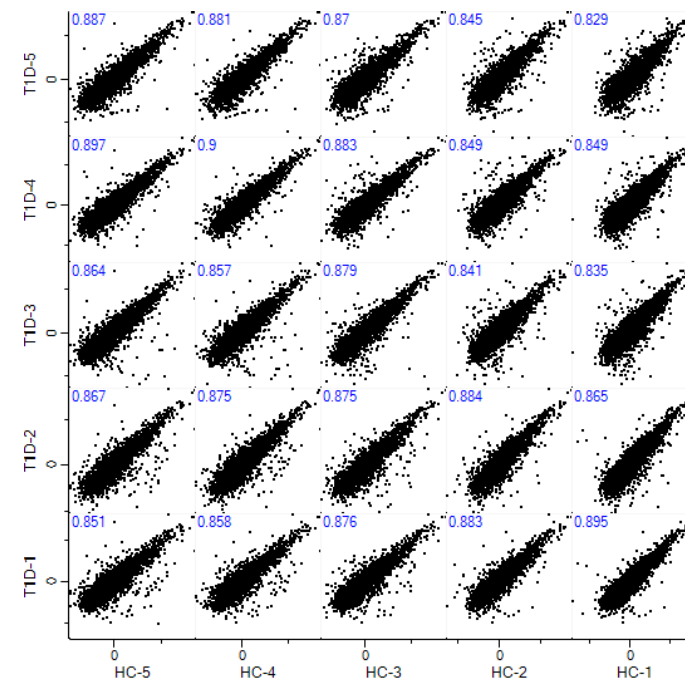

Correlation between five T1D and five HC replicates ( $r = 0.829 - 0.9$ )

Fig. S2

### HLA-I

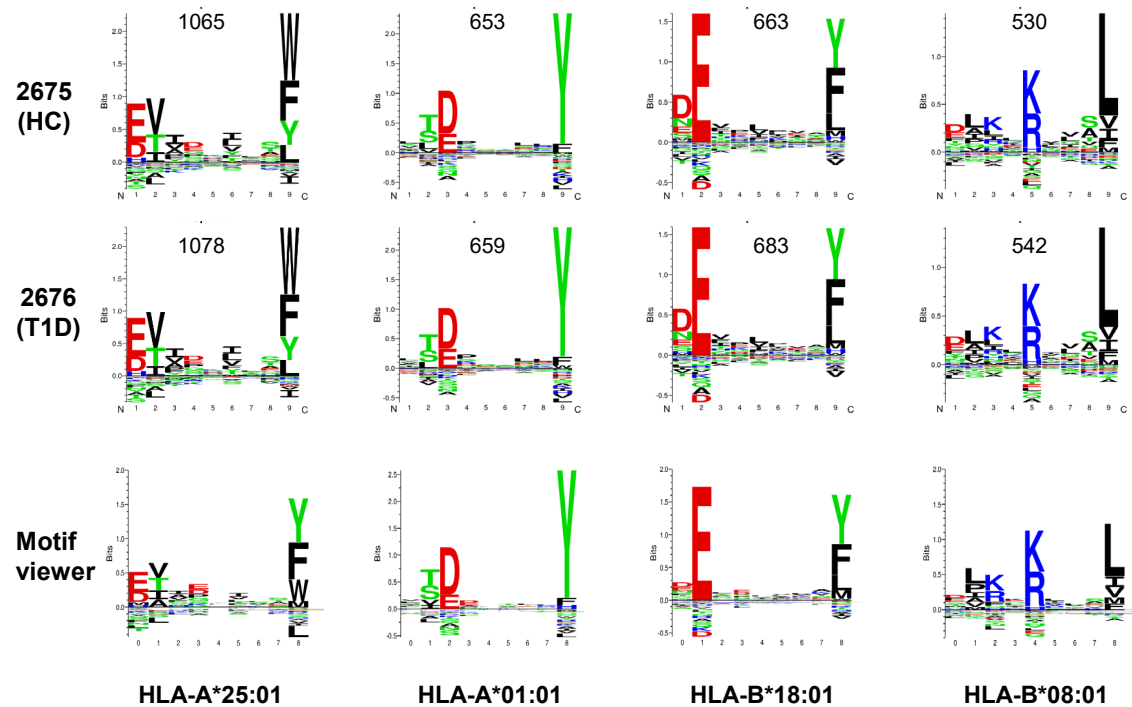

### HLA-II

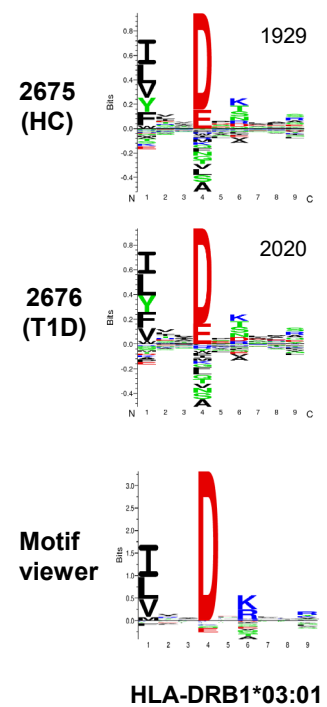

**Fig. S3**

**S3A**

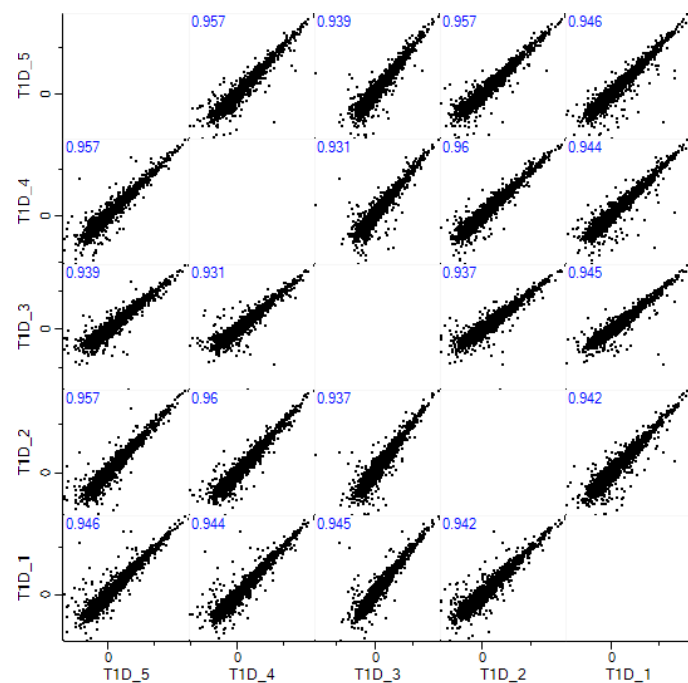

Correlation between five T1D replicates ( $r = 0.931 - 0.96$ )

**S3B**

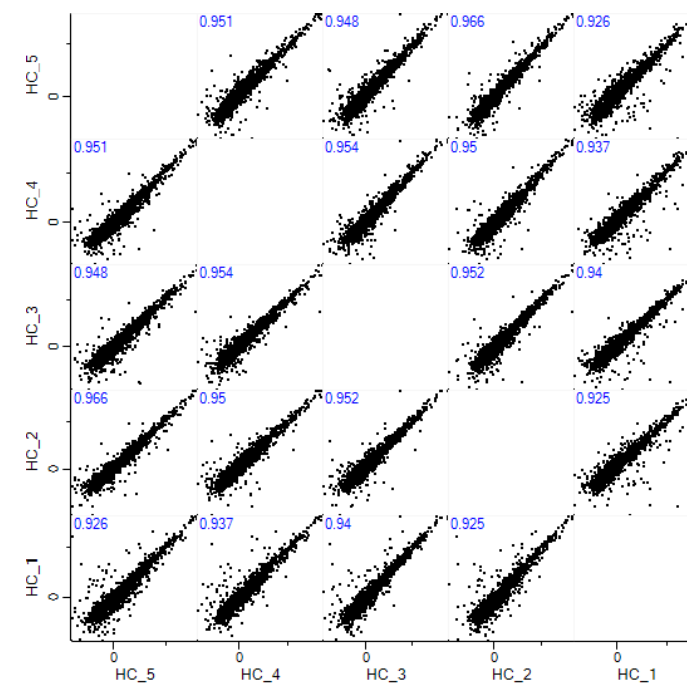

Correlation between five HC replicates ( $r = 0.925 - 0.966$ )

**S3C**

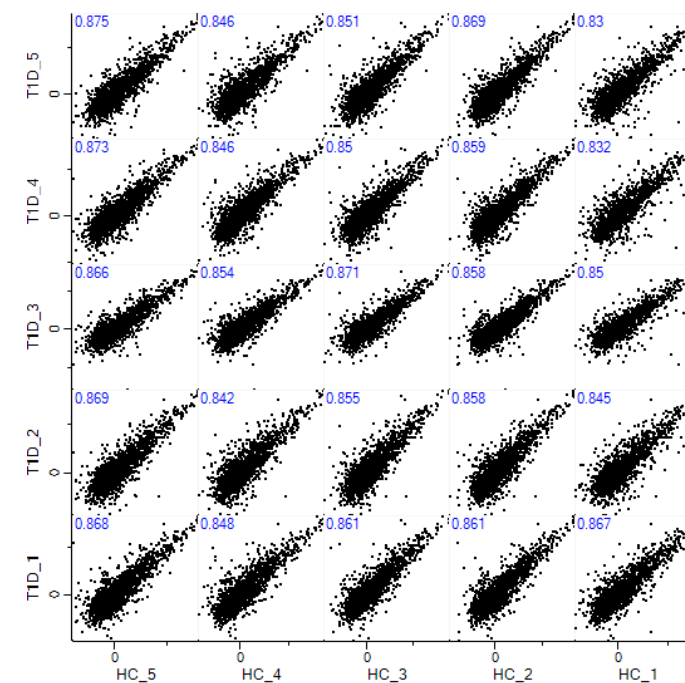

Correlation between five T1D and five HC replicates ( $r = 0.83 - 0.875$ )



**Fig. S5**

| No. | Uniprot ID | Protein symbol | Protein name                                                  | Sequence     | Length | Log2 Fold change | HLA class | HLA alleles | Criteria               |                           |                |
|-----|------------|----------------|---------------------------------------------------------------|--------------|--------|------------------|-----------|-------------|------------------------|---------------------------|----------------|
|     |            |                |                                                               |              |        |                  |           |             | Significant difference | Biological significance * | ID in T1D only |
| 1   | Q8IV61     | RASGRP3        | Ras guanyl-releasing protein 3                                | EVITKFINV    | 9      | 2.11             | I         | HLA-B08:01  | yes                    | &                         |                |
| 2   | Q9H1A4     | ANAPC1         | Anaphase-promoting complex subunit 1                          | NTDPSIVMTY   | 10     | 1.91             | I         | HLA-A01:01  | yes                    | & #                       |                |
| 3   | Q02223     | TNFRSF17       | Tumor necrosis factor receptor superfamily member 17          | DEIILPRGLEY  | 11     | 1.85             | I         | HLA-B18:01  | yes                    | &                         |                |
| 4   | Q96G74     | OTUD5          | OTU domain-containing protein 5                               | NEDEPIRVSY   | 10     | 1.66             | I         | HLA-B18:01  | yes                    | &                         |                |
| 5   | P01374     | LTA            | Lymphotoxin-alpha                                             | HEVQLFSSQY   | 10     | 1.65             | I         | HLA-B18:01  | yes                    | &                         |                |
| 6   | P68104     | EEF1A1         | Elongation factor 1-alpha 1                                   | ESFSDYPPLGRF | 12     | 1.59             | I         | HLA-A01:01  | yes                    | &                         |                |
| 7   | Q9UJX3     | ANAPC7         | Anaphase-promoting complex subunit 7                          | LLGSLADLY    | 9      | 1.59             | I         | HLA-A01:01  | yes                    | & #                       |                |
| 8   | Q03518     | TAP1           | Antigen peptide transporter 1                                 | TALPRIFSL    | 9      | 1.58             | I         | HLA-C12:03  | yes                    | & #                       |                |
| 9   | P42575     | CASP2          | Caspase-2                                                     | DMLVKVNAL    | 9      | 1.56             | I         | HLA-B08:01  | yes                    | &                         |                |
| 10  | P28062     | PSMB8          | Proteasome subunit beta type-8                                | VSDLLHQY     | 8      | 1.49             | I         | HLA-A01:01  | yes                    | & #                       |                |
| 11  | Q7L576     | CYFIP1         | Cytoplasmic FMR1-interacting protein 1                        | EVISGYEEL    | 9      | 1.45             | I         | HLA-A25:01  | yes                    | &                         |                |
| 12  | P42574     | CASP3          | Caspase-3                                                     | STAPGYYSW    | 9      | 1.28             | I         | HLA-C12:03  | yes                    | &                         |                |
| 13  | Q9NZ08     | ERAP1          | Endoplasmic reticulum aminopeptidase 1                        | ETIEENIGW    | 9      | 1.27             | I         | HLA-A25:01  | yes                    | & #                       |                |
| 14  | P40305     | IFI27          | Interferon alpha-inducible protein 27, mitochondrial          | AAVPMVLSA    | 9      | 1.27             | I         | HLA-C12:03  | yes                    | &                         |                |
| 15  | Q01518     | CAP1           | Adenylyl cyclase-associated protein 1                         | NEFPVPEQF    | 9      | 1.27             | I         | HLA-B18:01  | yes                    | &                         |                |
| 16  | P42224     | STAT1          | Signal transducer and activator of transcription 1-alpha/beta | DSFPMERQY    | 10     | 1.21             | I         | HLA-A01:01  | yes                    | &                         |                |
| 17  | P41218     | MNDA           | Myeloid cell nuclear differentiation antigen                  | EVPNRIIEI    | 9      | 1.13             | I         | HLA-A25:01  | yes                    | &                         |                |
| 18  | P14625     | HSP90B1        | Endoplasmic                                                   | MMKLIINSL    | 9      | 1.12             | I         | HLA-B08:01  | yes                    | &                         |                |
| 19  | Q9UH77     | KLHL3          | Kelch-like protein 3                                          | EVYDPGNTW    | 10     | 1.10             | I         | HLA-A25:01  | yes                    | & #                       |                |
| 20  | Q5SRE5     | NUP188         | Nucleoporin NUP188 homolog                                    | EVAPSGTTL    | 9      | 1.06             | I         | HLA-A25:01  | yes                    | &                         |                |
| 21  | Q53GT1     | KLHL22         | Kelch-like protein 22                                         | EEVLIHGVSY   | 10     | 1.05             | I         | HLA-B18:01  | yes                    | & #                       |                |
| 22  | Q96PU5     | NEDD4L         | E3 ubiquitin-protein ligase NEDD4-like                        | ASDPYVKLSLY  | 11     | 1.01             | I         | HLA-A01:01  | yes                    | & #                       |                |
| 23  | P12270     | TPR            | Nucleoprotein TPR                                             | HLNTEKELL    | 8      |                  | I         | HLA-B08:01  |                        | &                         | yes            |
| 24  | O00463     | TRAF5          | TNF receptor-associated factor 5                              | EVIKSQEVF    | 9      |                  | I         | HLA-A25:01  |                        |                           | yes            |
| 25  | O15439     | ABCC4          | Multidrug resistance-associated protein 4                     | EVITGIRII    | 9      |                  | I         | HLA-A25:01  |                        |                           | yes            |
| 26  | Q9NX02     | NLRP2          | NACHT, LRR and PYD domains-containing protein 2               | LLDEGAKLLY   | 10     |                  | I         | HLA-A01:01  |                        |                           | yes            |
| 27  | P01850     | TRBC1          | T-cell receptor beta-1 chain C region                         | YEILLGKATLY  | 11     |                  | I         | HLA-B18:01  |                        |                           | yes            |

\* STRING database shown proteins associated with reactome pathways, immune system (&) and/or MHC-I antigen presenting and processing (#)

HLA-I alleles with relatively higher binding affinity for immunopeptides were listed.



**Fig. S6**

| No. | Uniprot ID | Protein symbol | Protein name                                                   | Sequence            | Length | Log2 Fold change | HLA class | HLA alleles               | Criteria               |                          |                | MixMHC2pred<br>%Rank_best score | PRM |
|-----|------------|----------------|----------------------------------------------------------------|---------------------|--------|------------------|-----------|---------------------------|------------------------|--------------------------|----------------|---------------------------------|-----|
|     |            |                |                                                                |                     |        |                  |           |                           | Significant difference | Biological significance* | ID in T1D only |                                 |     |
| 1   | P09668     | CTSH           | Pro-cathepsin H                                                | LPSQAFEYILYNGKIM    | 16     | 3.23             | II        | HLA-DPA1*01:03-DPB1*04:01 | yes                    | & #                      |                | 0.039                           | yes |
| 2   | P61769     | B2M            | Beta-2-microglobulin                                           | YLLYYTEFTPTKDEY     | 16     | 2.52             | II        | HLA-DPA1*01:03-DPB1*04:01 | yes                    | &                        |                | 0.482                           | yes |
| 3   | O75787     | ATP6AP2        | Renin receptor                                                 | DASKILVDALQKFADD    | 16     | 2.42             | II        | HLA-DRB1*03:01            | yes                    | &                        |                | 0.129                           | yes |
| 4   | P26951     | IL3RA          | Interleukin-3 receptor subunit alpha                           | GPGAPADVQYDLYLNVANR | 19     | 2.31             | II        | HLA-DPA1*01:03-DPB1*04:01 | yes                    | &                        |                | 0.286                           | yes |
| 5   | P01374     | LTA            | Lymphotoxin-alpha                                              | HSMYHGAAFLTQGGDQ    | 16     | 2.24             | II        | HLA-DQA1*05:01-DQB1*03:02 | yes                    | &                        |                | NA                              |     |
| 6   | O14672     | ADAM10         | Disintegrin and metalloproteinase domain-containing protein 10 | FPNIGVEKFLELNSE     | 15     | 2.11             | II        | HLA-DPA1*01:03-DPB1*04:01 | yes                    | &                        |                | 0.00988                         | yes |
| 7   | P07437     | TUBB           | Tubulin beta chain                                             | GSDLQLDRISVYYNEA    | 17     | 1.93             | II        | HLA-DRB1*03:01            | yes                    | &                        |                | 0.737                           | yes |
| 8   | P11142     | HSPA8          | Heat shock cognate 71 kDa protein                              | VLRIINEPTAAAIAYG    | 16     | 1.78             | II        | HLA-DQA1*05:01-DQB1*03:02 | yes                    | &                        |                | NA                              | yes |
| 9   | P09668     | CTSH           | Pro-cathepsin H                                                | LPSQAFEYILYNGKI     | 15     | 1.77             | II        | HLA-DPA1*01:03-DPB1*04:01 | yes                    | & #                      |                | 0.47                            | yes |
| 10  | P13164     | IFITM1         | Interferon-induced transmembrane protein 1                     | VPDHVVWSLFNTL       | 13     | 1.51             | II        | HLA-DPA1*01:03-DPB1*02:01 | yes                    | &                        |                | 0.0548                          | yes |
| 11  | P09668     | CTSH           | Pro-cathepsin H                                                | LPSQAFEYILYNGK      | 14     | 1.38             | II        | HLA-DPA1*01:03-DPB1*04:01 | yes                    | & #                      |                | 0.288                           | yes |
| 12  | Q12913     | PTPRJ          | Receptor-type tyrosine-protein phosphatase eta                 | DVYGIYDLRMHRP       | 14     | 1.37             | II        | HLA-DRB1*03:01            | yes                    | &                        |                | 0.00412                         |     |
| 13  | O15143     | ARPC1B         | Actin-related protein 2/3 complex subunit 1B                   | ALTFITDNSLVAAGHD    | 16     | 1.28             | II        | HLA-DRB1*04:01            | yes                    | &                        |                | 0.0195                          | yes |
| 14  | Q13114     | TRAF3          | TNF receptor-associated factor 3                               | GDAFKPDPNSSSFKKPT   | 17     | 1.21             | II        | HLA-DRB1*04:01            | yes                    | &                        |                | 0.316                           | yes |
| 15  | P11142     | HSPA8          | Heat shock cognate 71 kDa protein                              | ERAMTKDNLLGKFEL     | 16     | 1.15             | II        | HLA-DRB1*03:01            | yes                    | &                        |                | 0.382                           | yes |
| 16  | Q9H3Z4     | DNAJC5         | DnaJ homolog subfamily C member 5                              | TTQLTADSHPSYHTDG    | 16     | 1.11             | II        | HLA-DRB1*03:01            | yes                    | &                        |                | 0.757                           | yes |
| 17  | P25774     | CTSS           | Cathepsin S                                                    | NGGFMTTAFQYIIDNK    | 16     | 1.10             | II        | HLA-DPA1*01:03-DPB1*04:01 | yes                    | & #                      |                | 0.0119                          | yes |
| 18  | P11142     | HSPA8          | Heat shock cognate 71 kDa protein                              | VLRIINEPTAAAIAY     | 15     | 1.04             | II        | HLA-DQA1*05:01-DQB1*03:02 | yes                    | &                        |                | NA                              | yes |
| 19  | P14618     | PKM            | Pyruvate kinase PKM                                            | DENILWLDYKNICKVVE   | 17     |                  | II        | HLA-DRB1*03:01            |                        | &                        | yes            | 0.497                           |     |
| 20  | P21580     | TNFAIP3        | Tumor necrosis factor alpha-induced protein 3                  | EINLVDDYFELVQHE     | 15     |                  | II        | HLA-DQA1*03:01-DQB1*02:01 |                        | &                        | yes            | NA                              | yes |
| 21  | P52907     | CAPZA1         | F-actin-capping protein subunit alpha-1                        | FNEVFNDVRLNNDN      | 16     |                  | II        | HLA-DRB1*03:01            |                        | & #                      | yes            | 0.00543                         |     |
| 22  | P10147     | CCL3           | C-C motif chemokine 3                                          | IPQNFADYFETSSQ      | 15     |                  | II        | HLA-DPA1*01:03-DPB1*04:01 |                        | &                        | yes            | 0.0053                          | yes |
| 23  | O00754     | MAN2B1         | Lysosomal alpha-mannosidase                                    | IRATFDPDTGLLMEIM    | 16     |                  | II        | HLA-DRB1*03:01            |                        | &                        | yes            | 0.117                           |     |
| 24  | P26951     | IL3RA          | Interleukin-3 receptor subunit alpha                           | GPGAPADVQYDLYLNVA   | 17     |                  | II        | HLA-DPA1*01:03-DPB1*04:01 |                        | &                        | yes            | 0.434                           |     |
| 25  | P09668     | CTSH           | Pro-cathepsin H                                                | LPSQAFEYILYNGKIMGED | 19     |                  | II        | HLA-DPA1*01:03-DPB1*04:01 |                        | & #                      | yes            | 0.754                           | yes |

\* STRING database shown proteins associated with reactome pathways, immune system (&) and/or MHC-II antigen presentation (#); NA, allele not included in MixMHC2pred.

HLA-II alleles with relatively higher binding affinity for immunopeptides were listed.

**Fig. S7**

**Pages: 10 - 37**

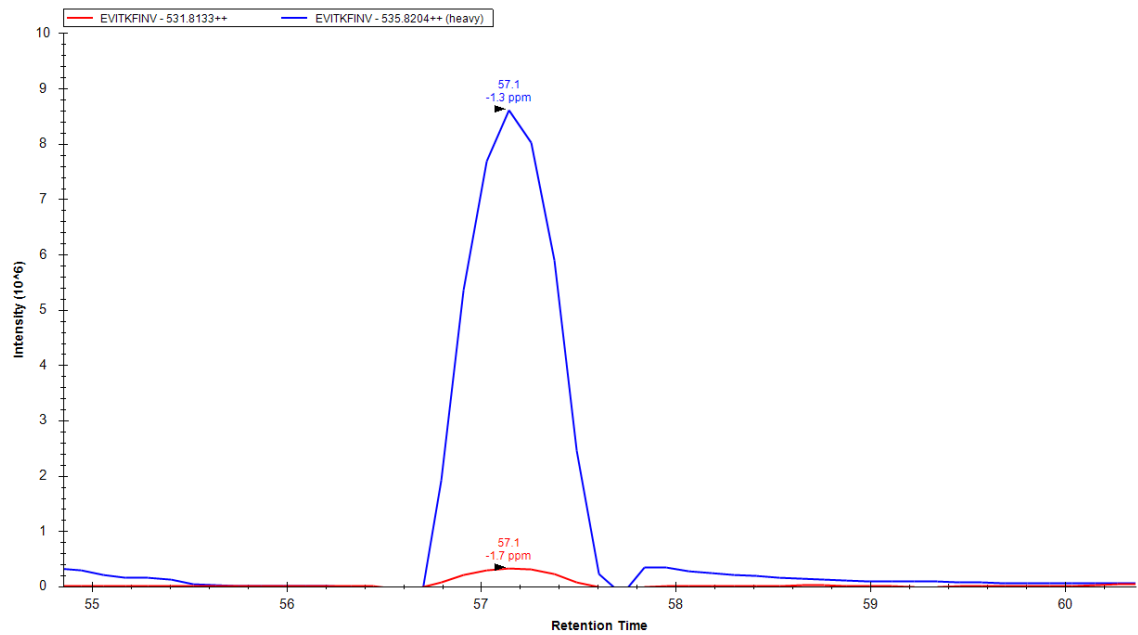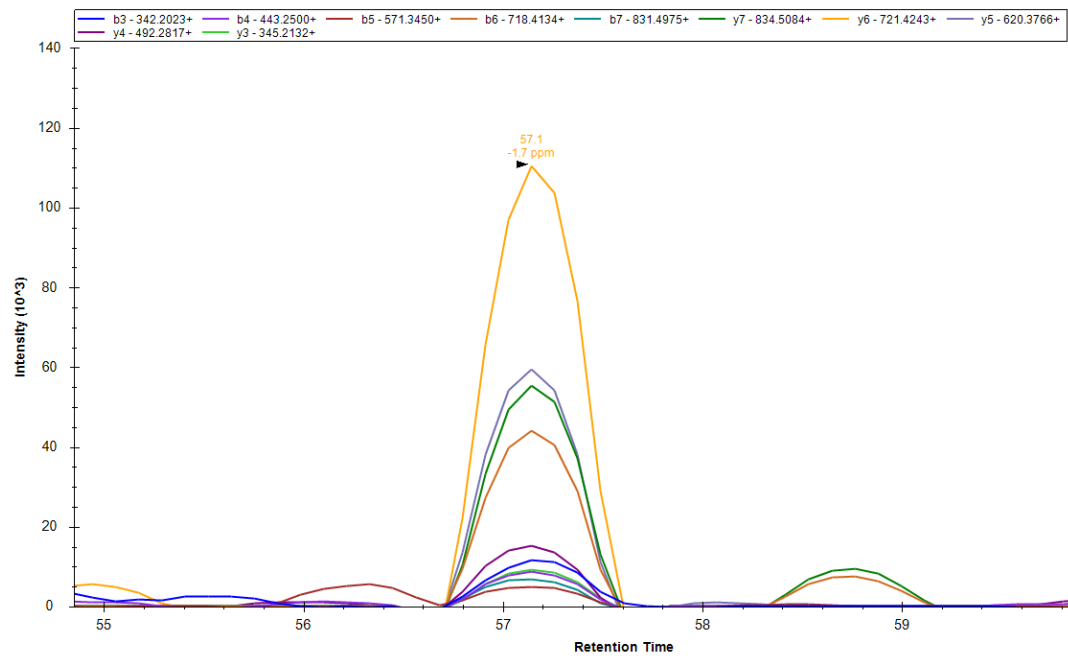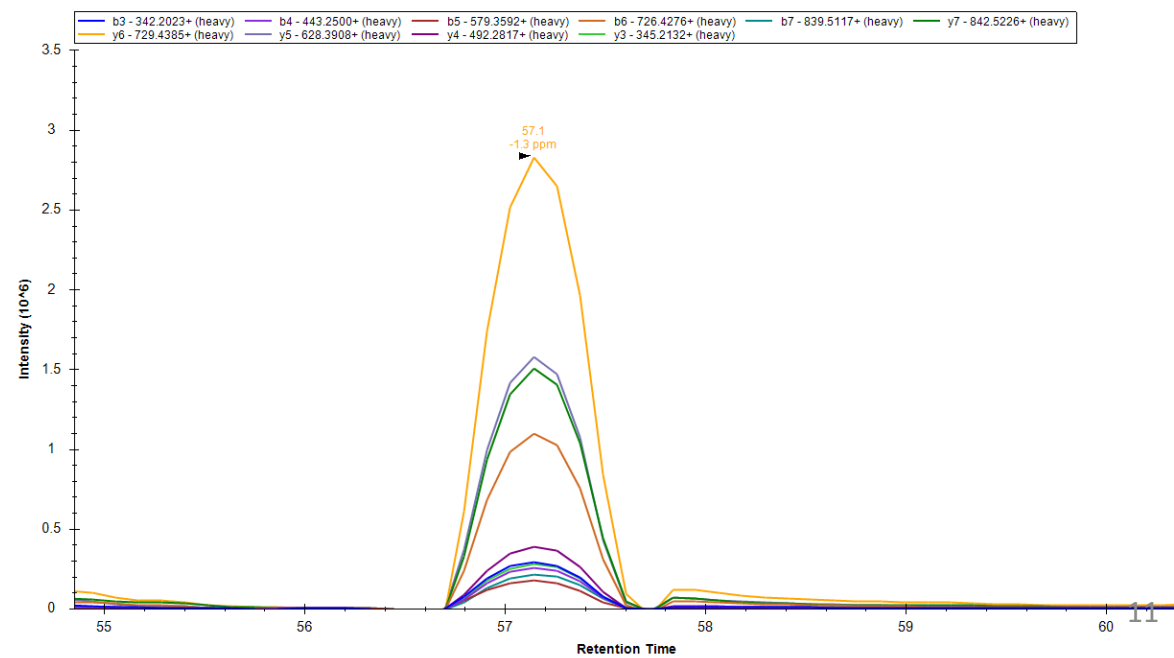

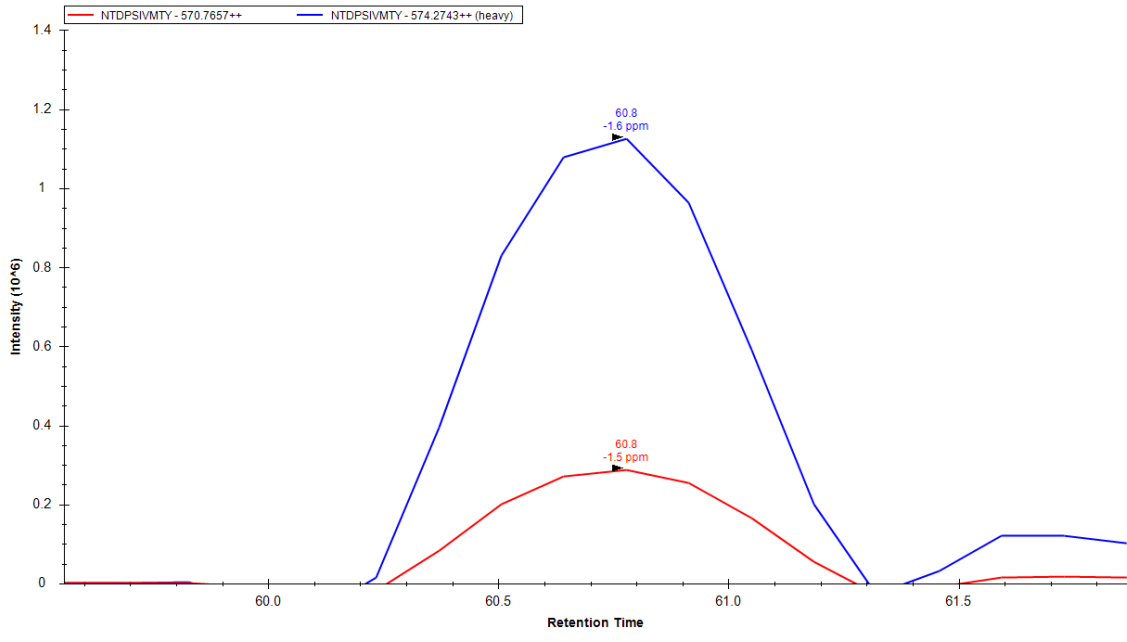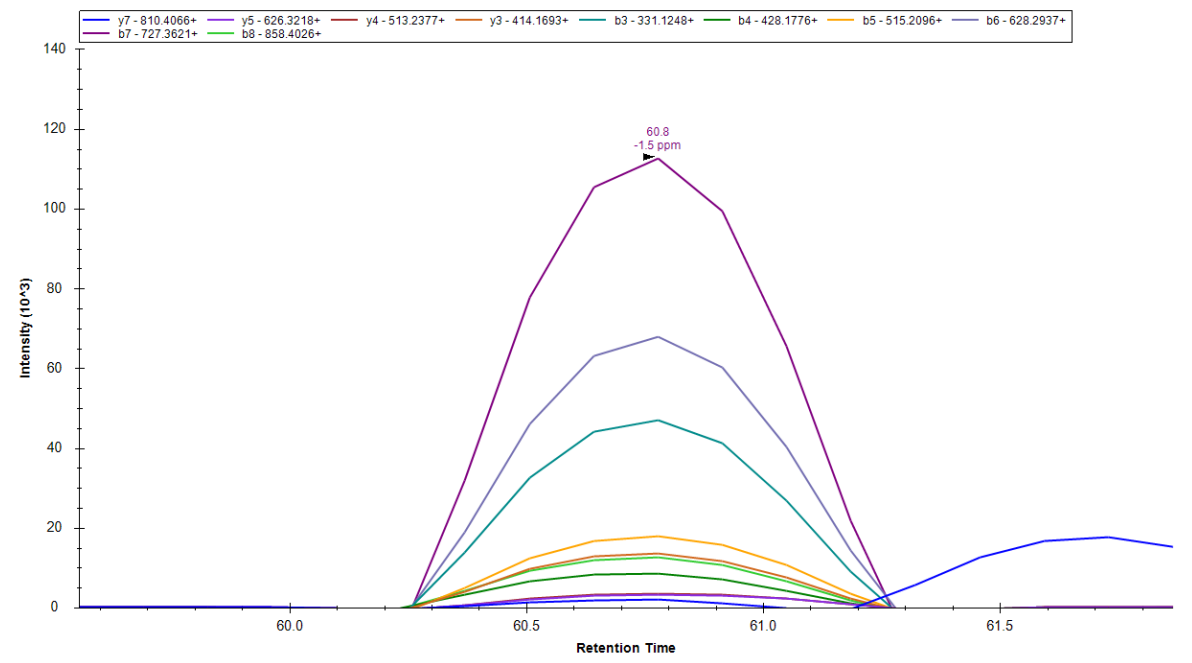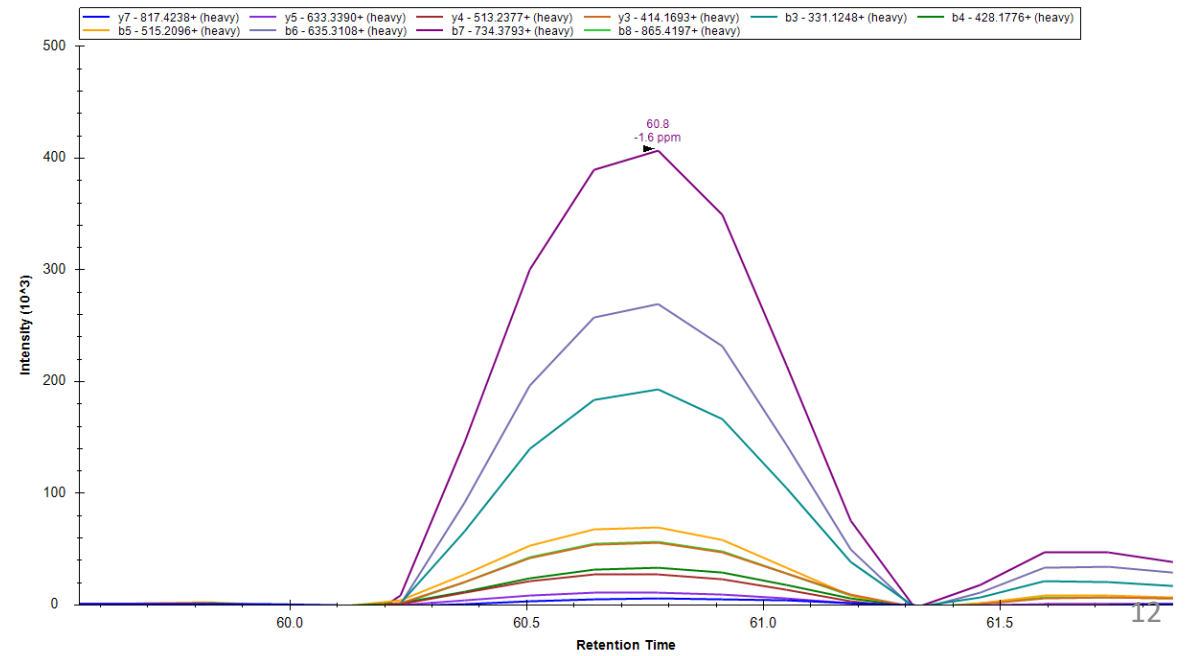

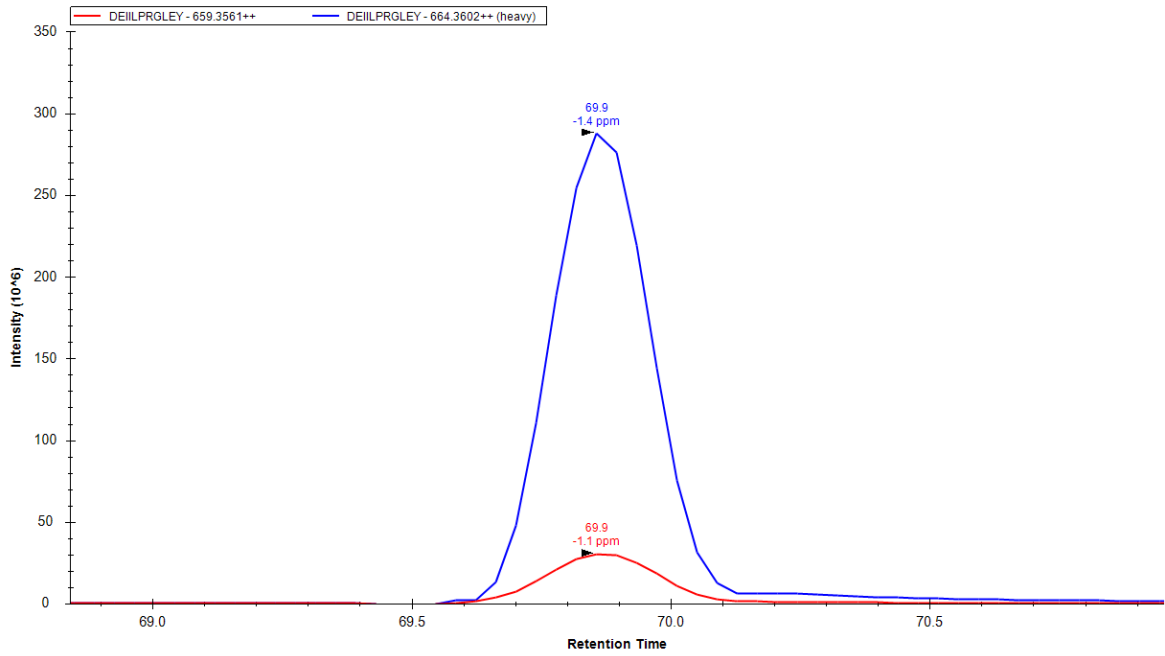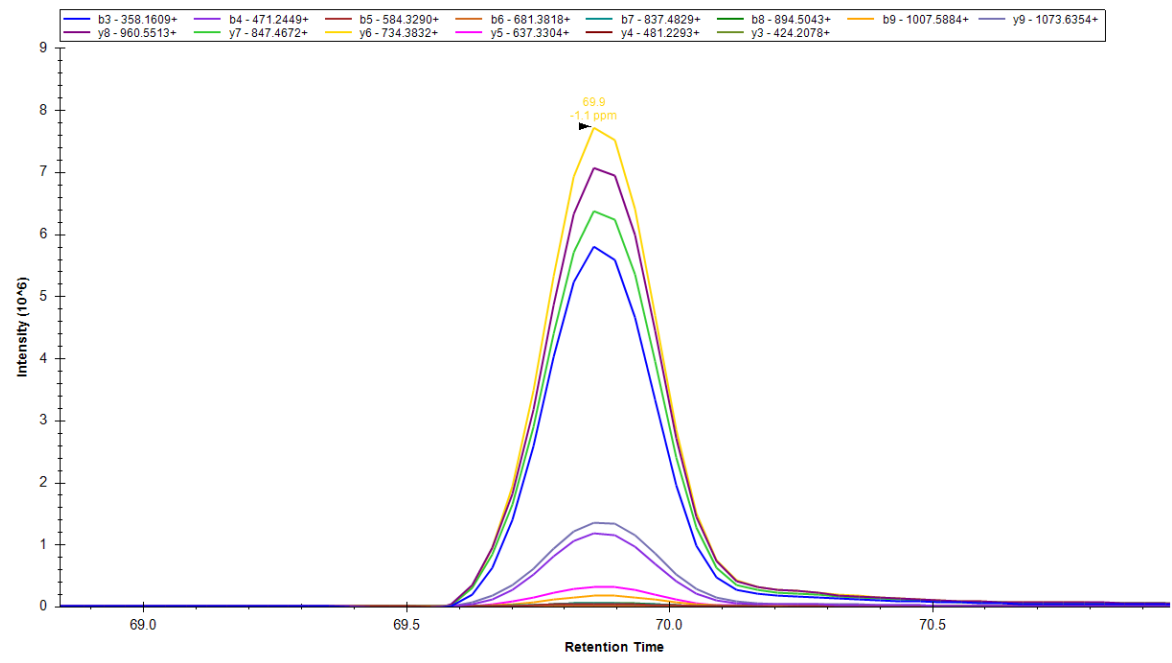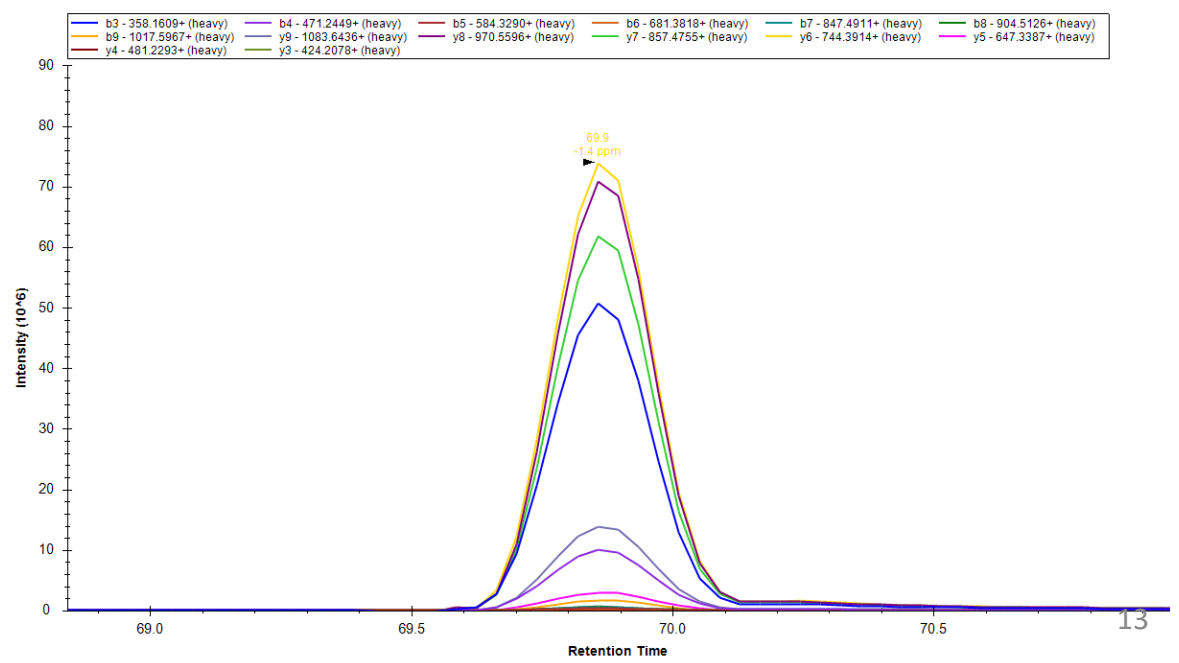

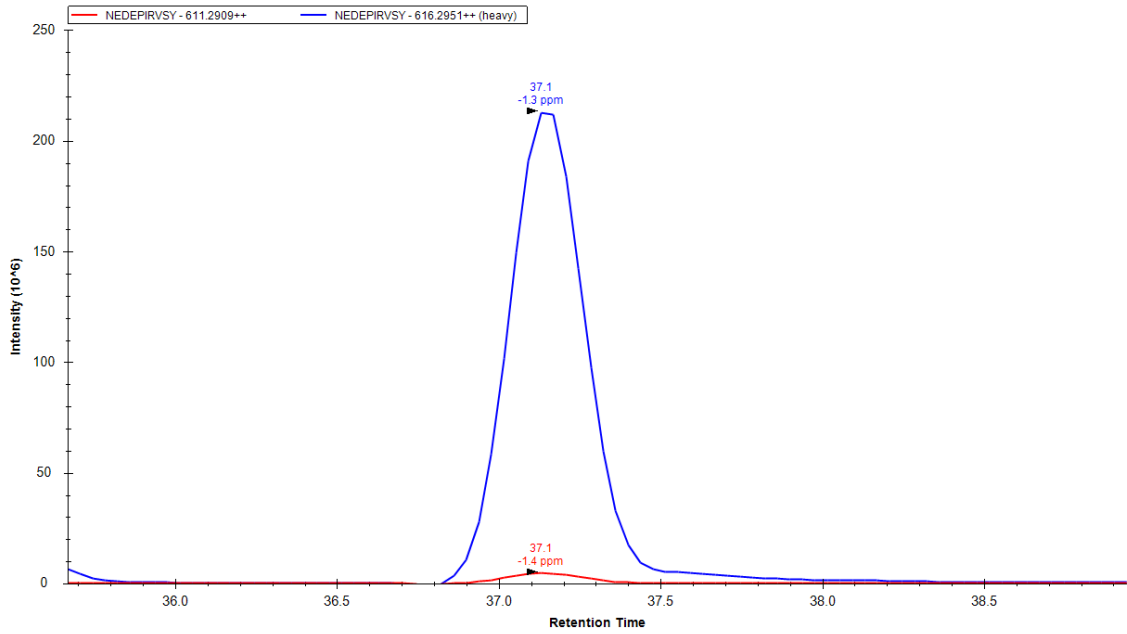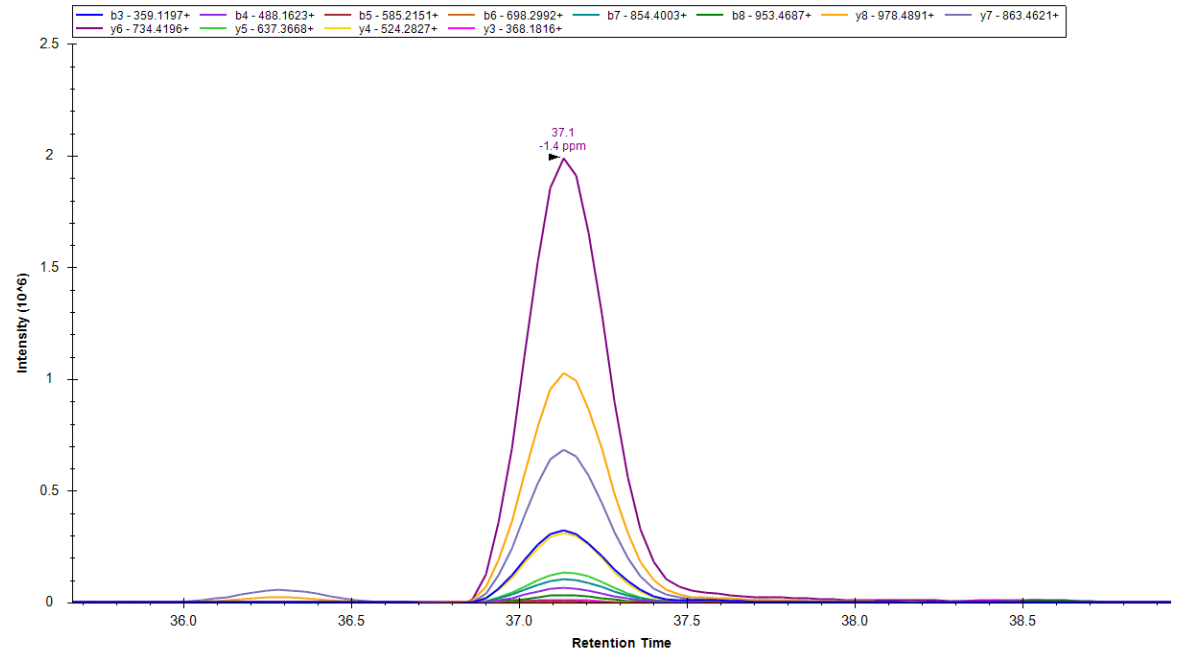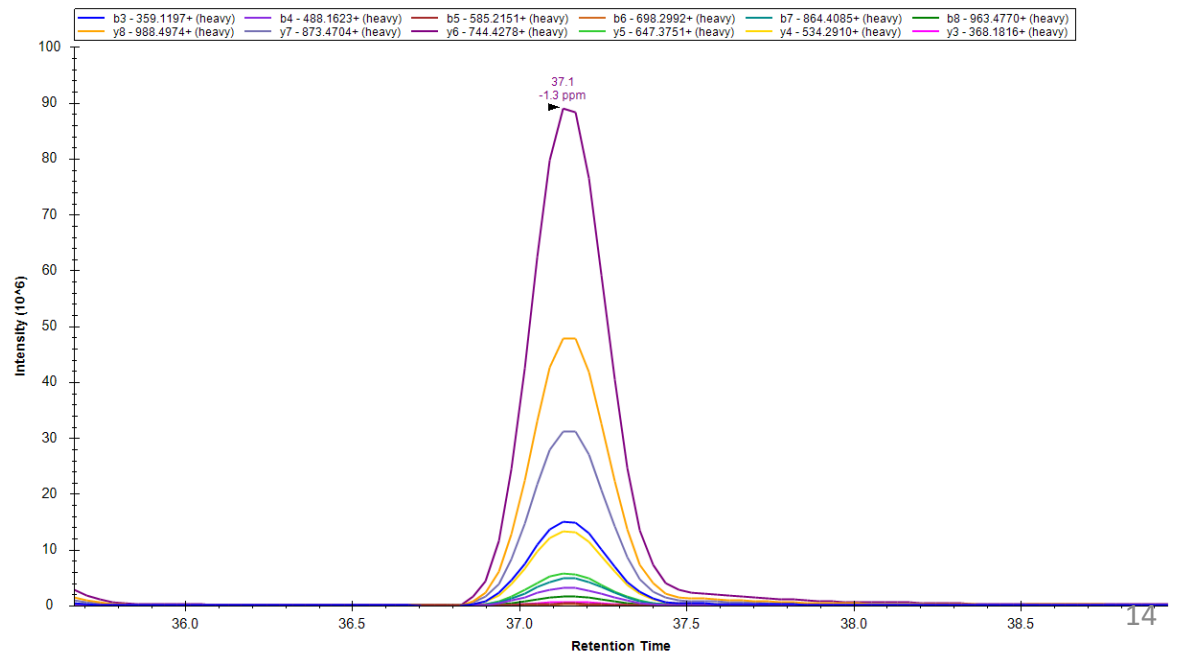

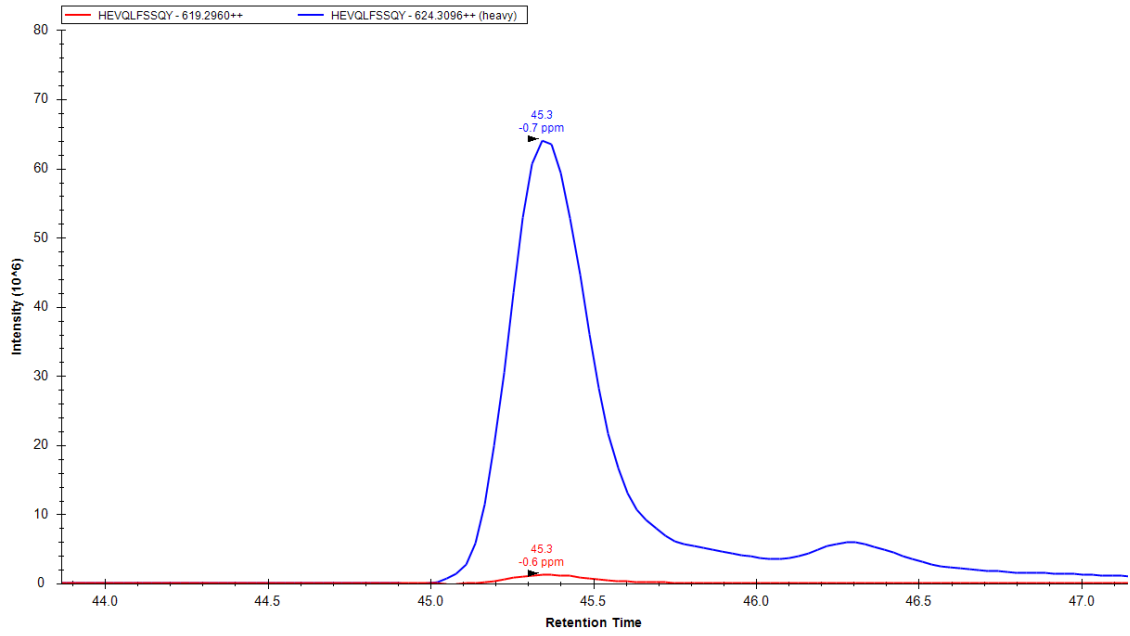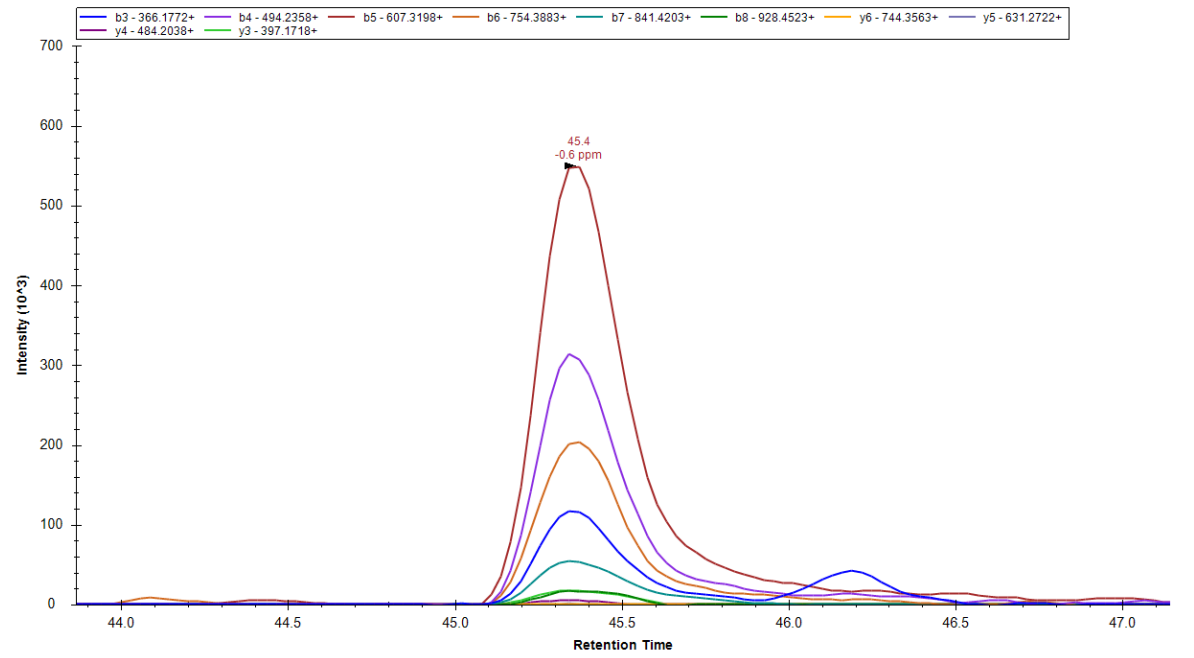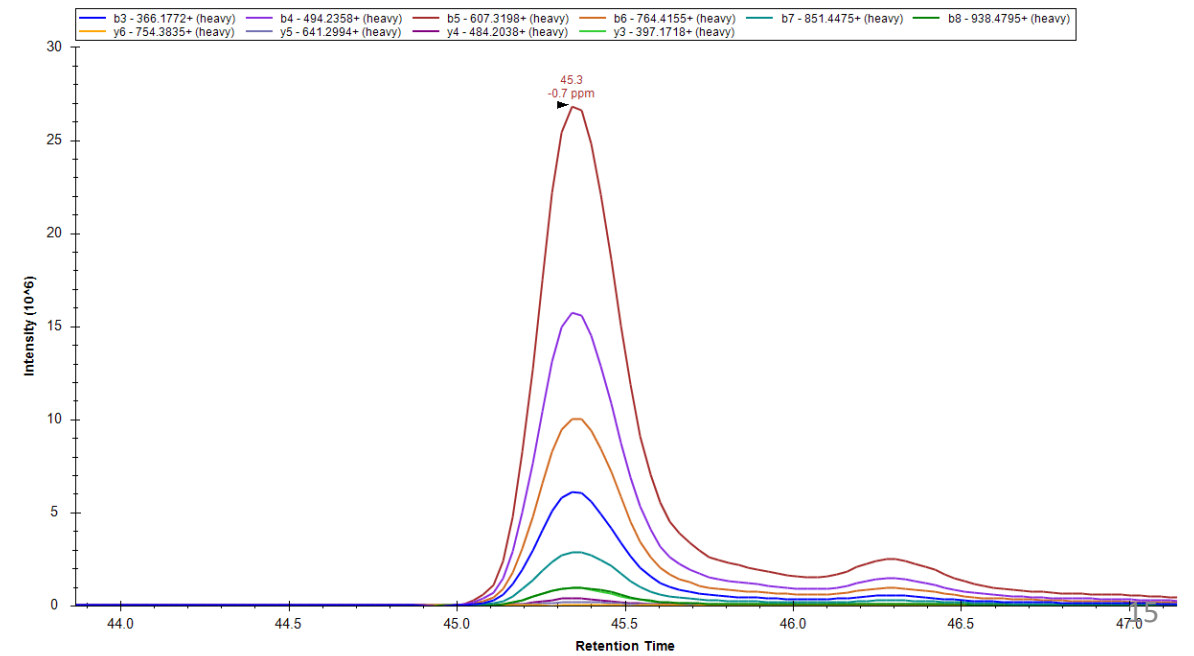

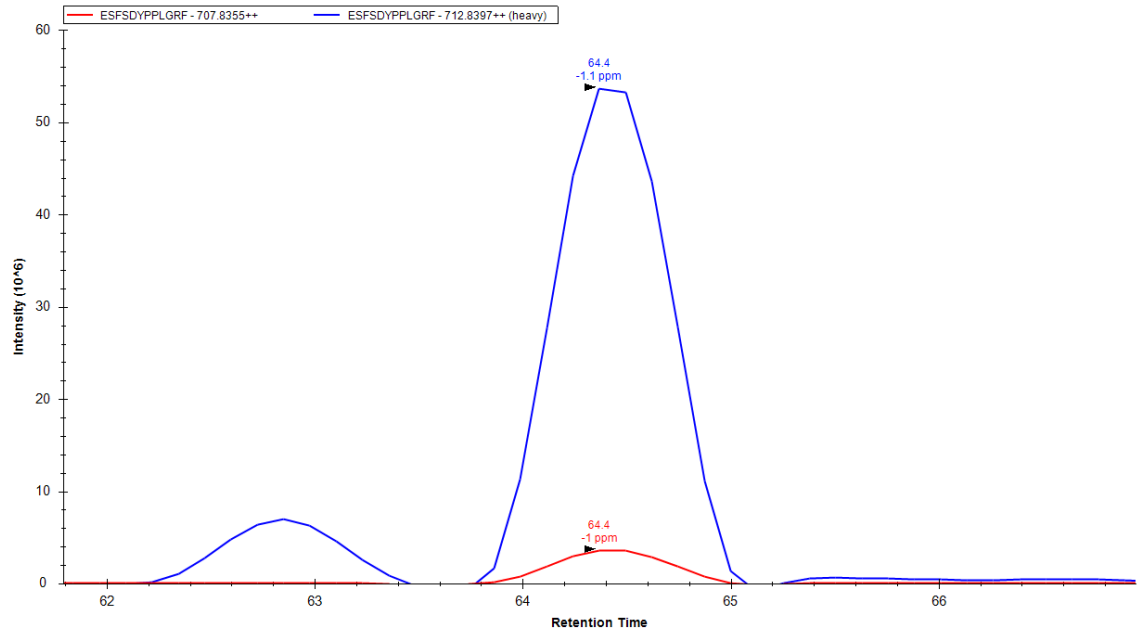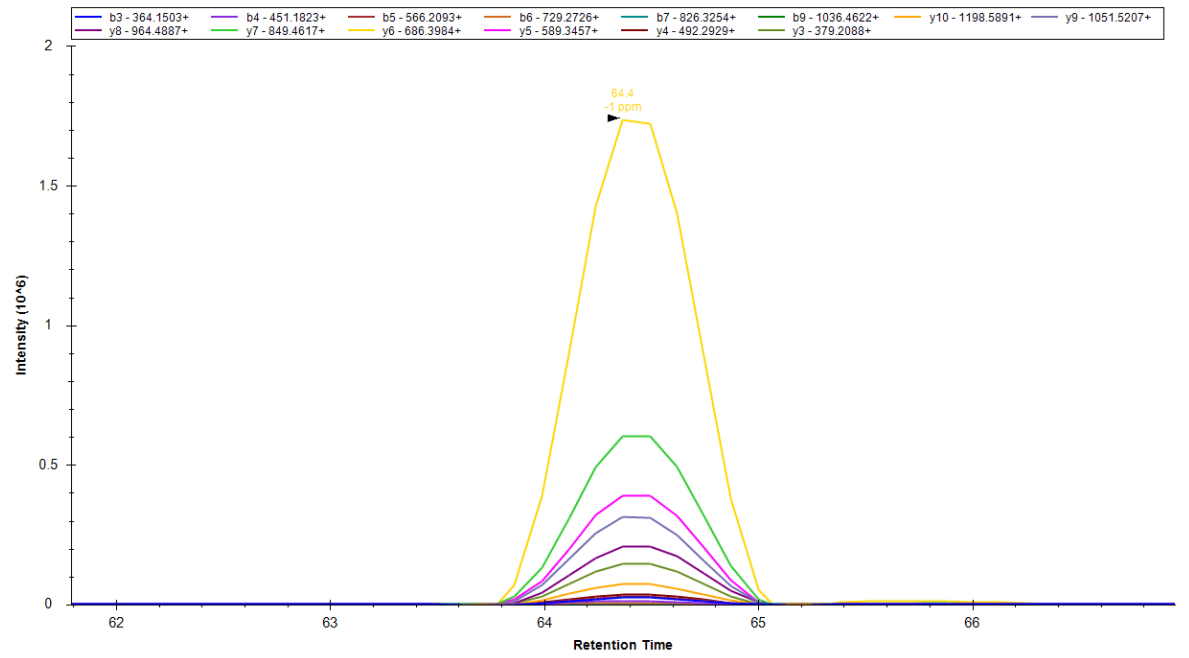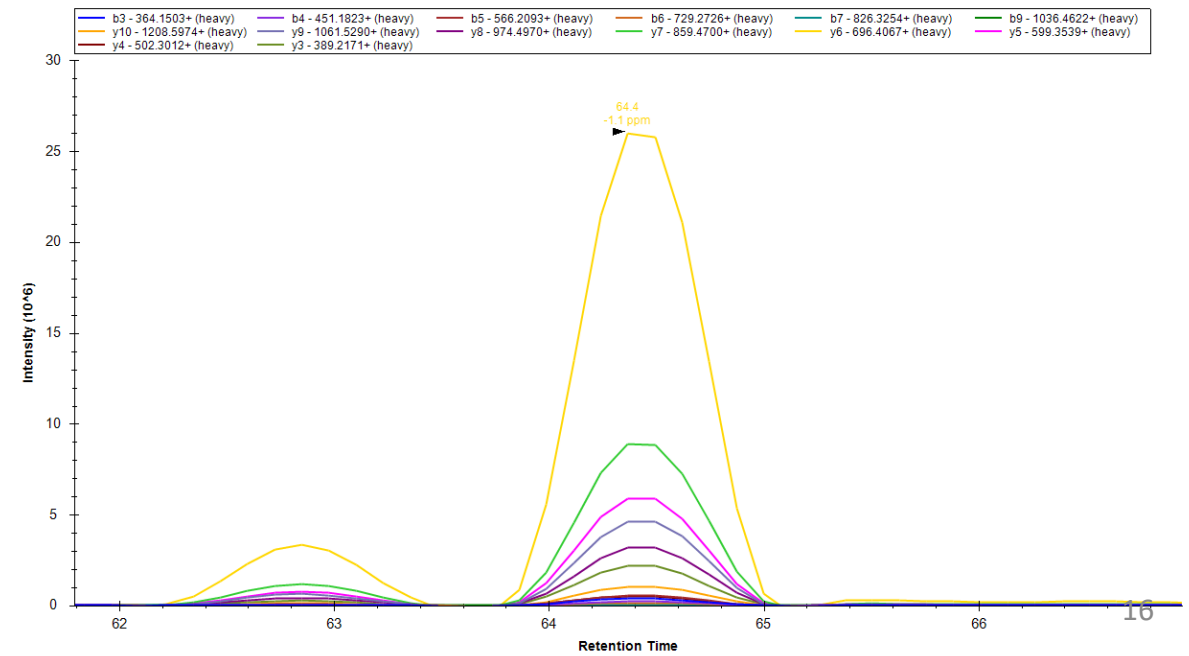



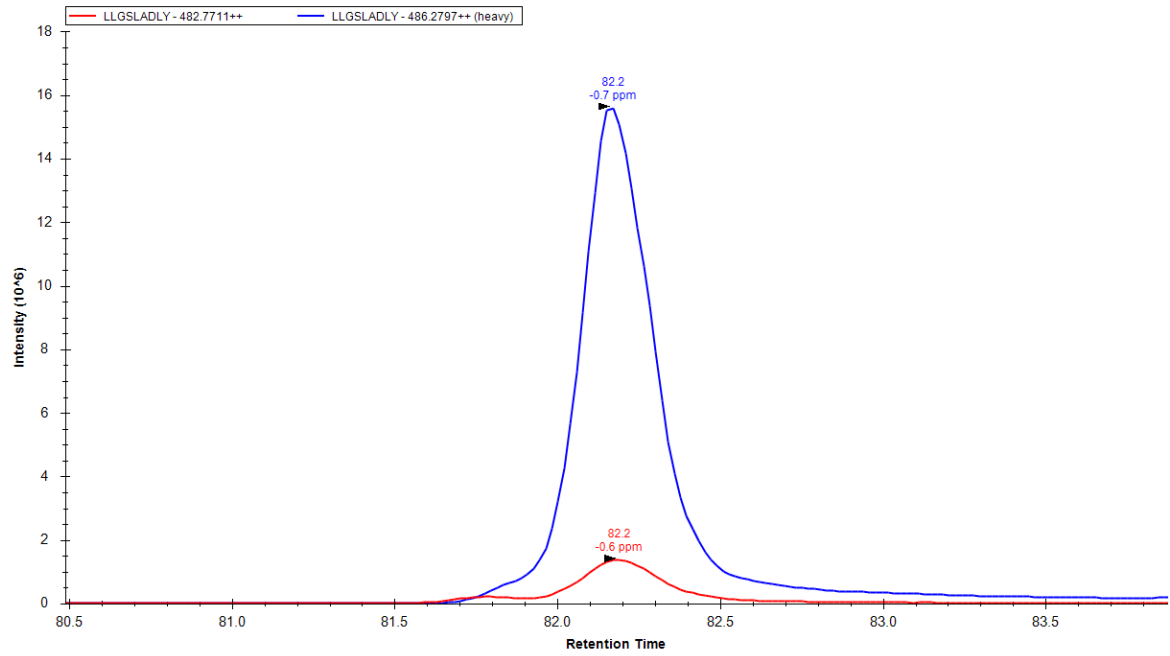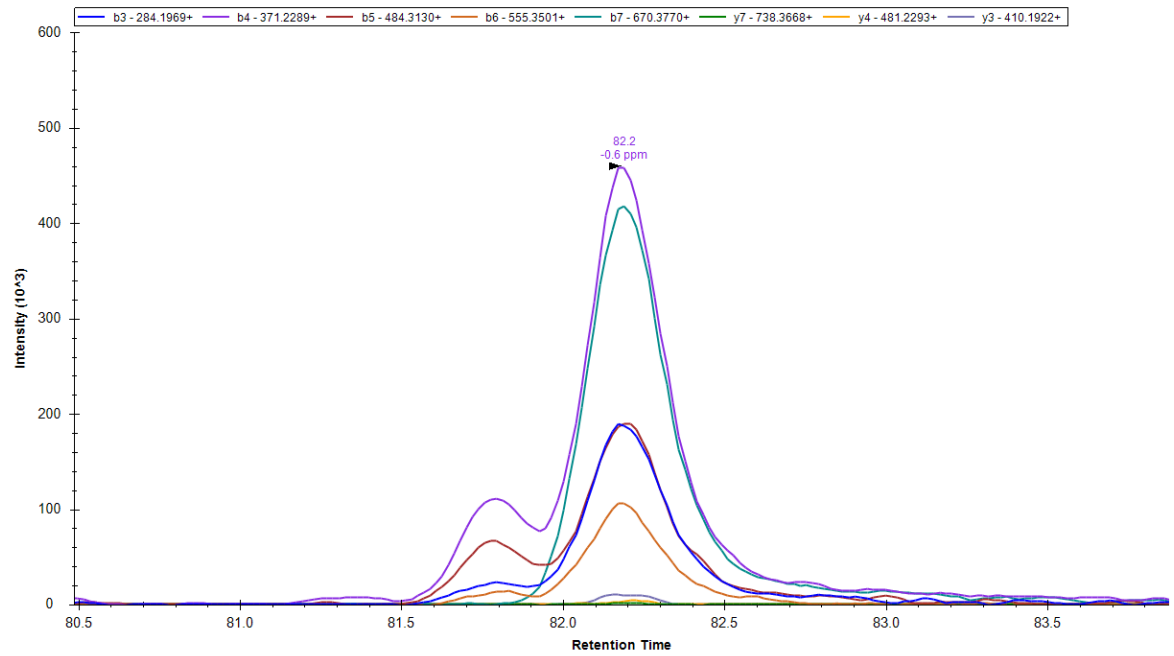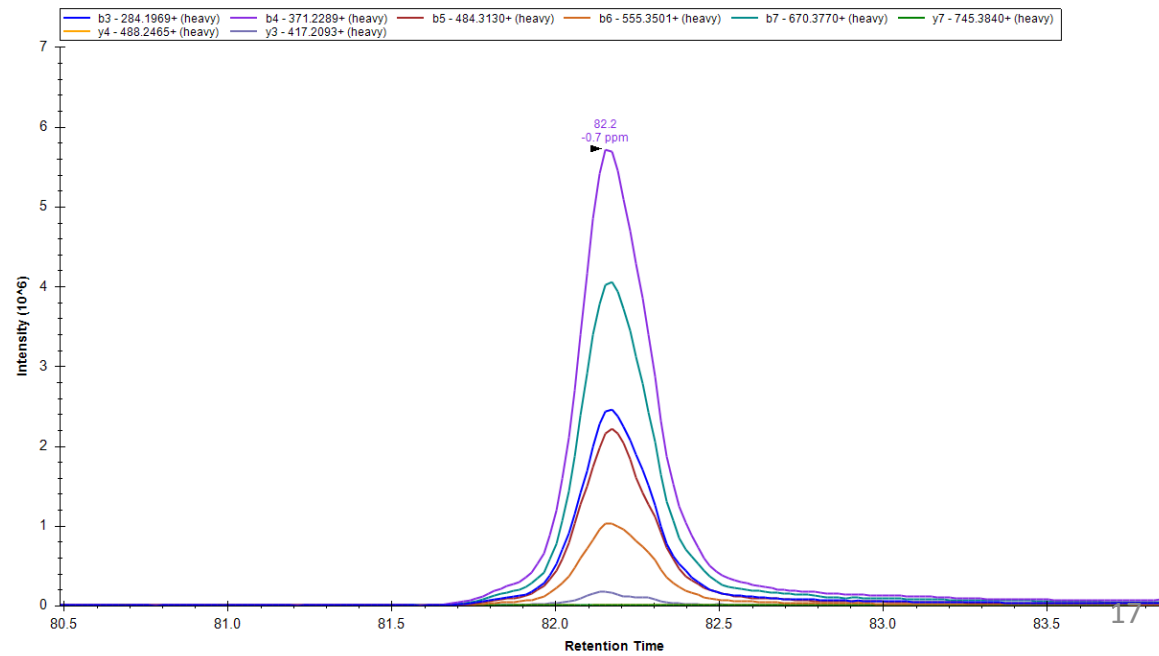

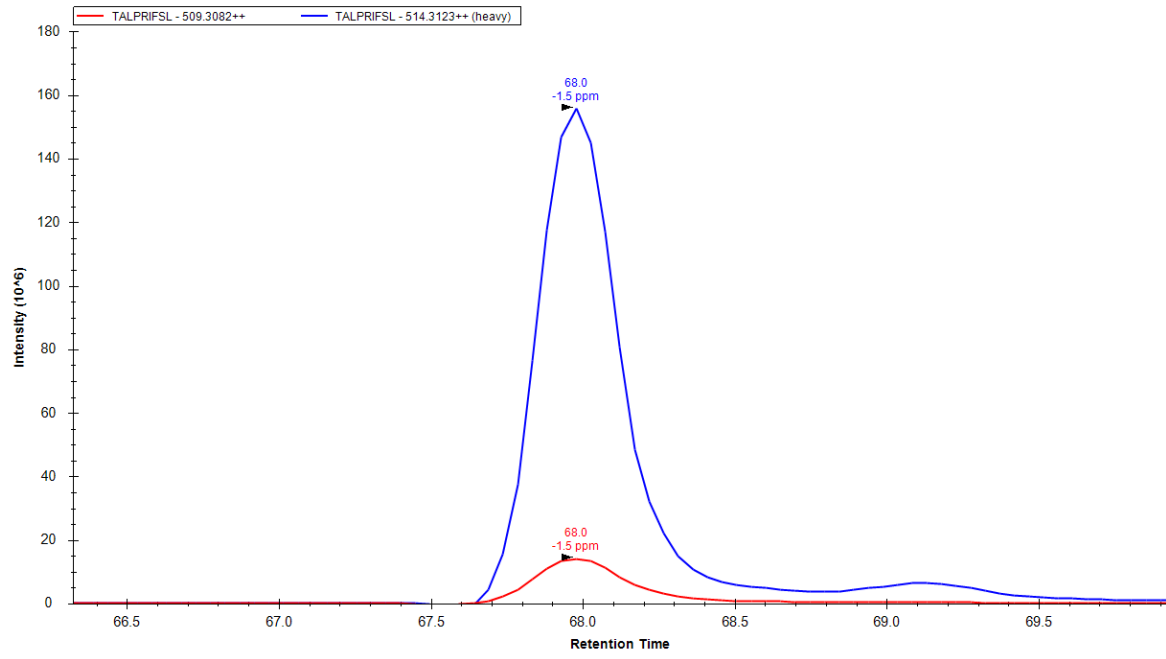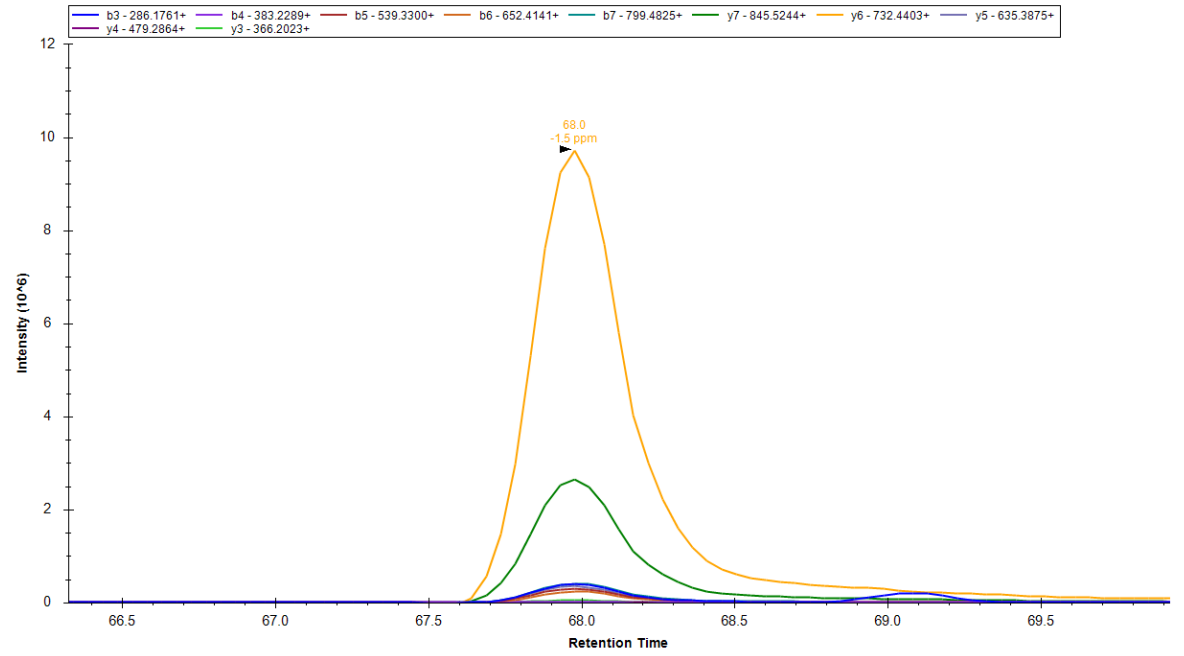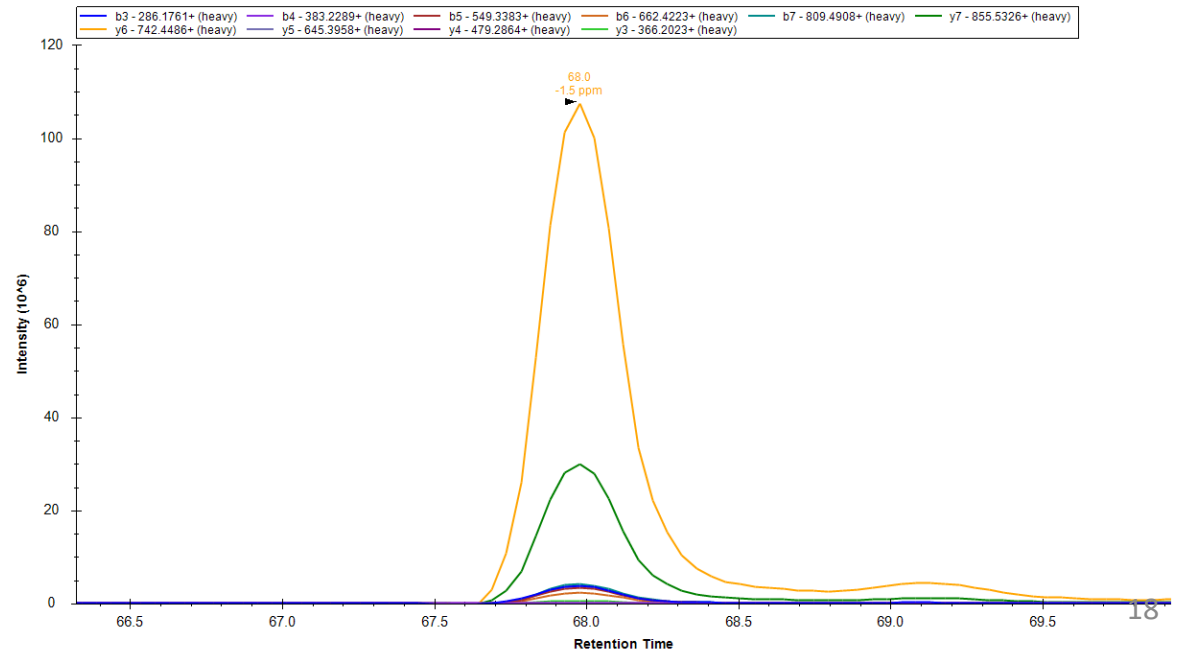

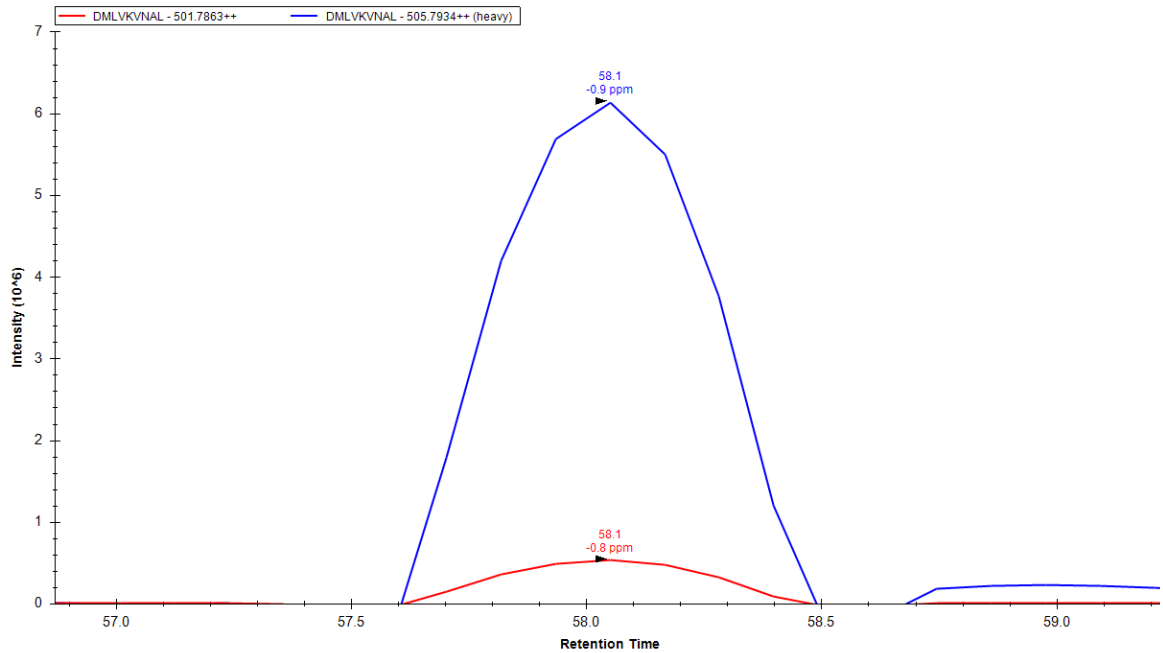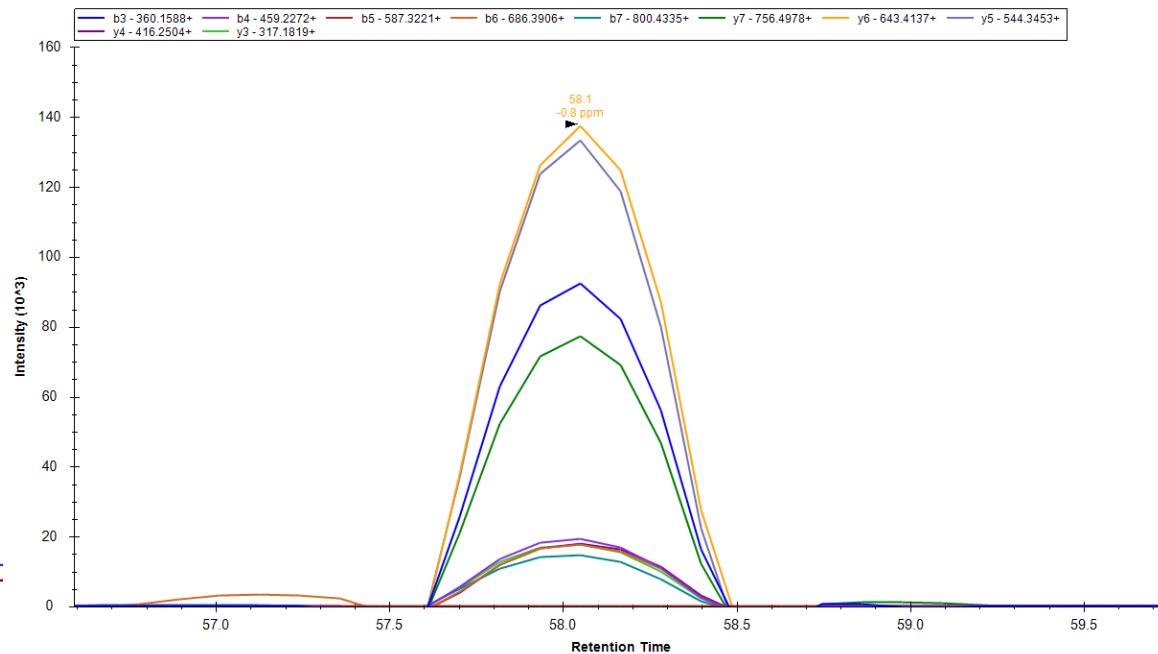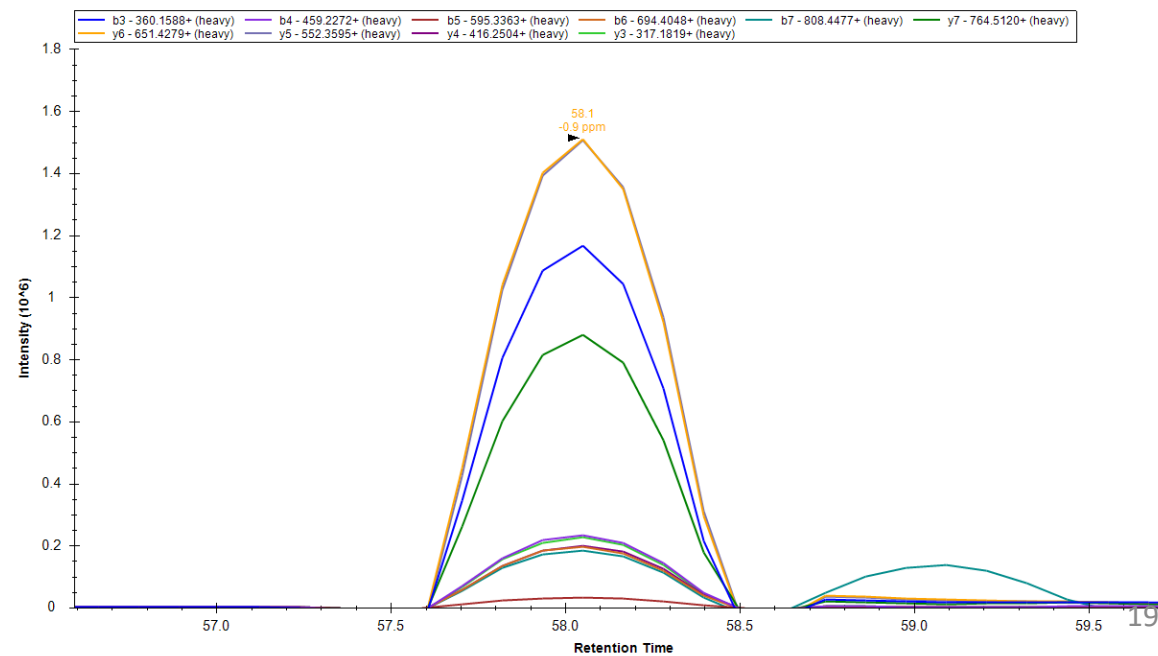

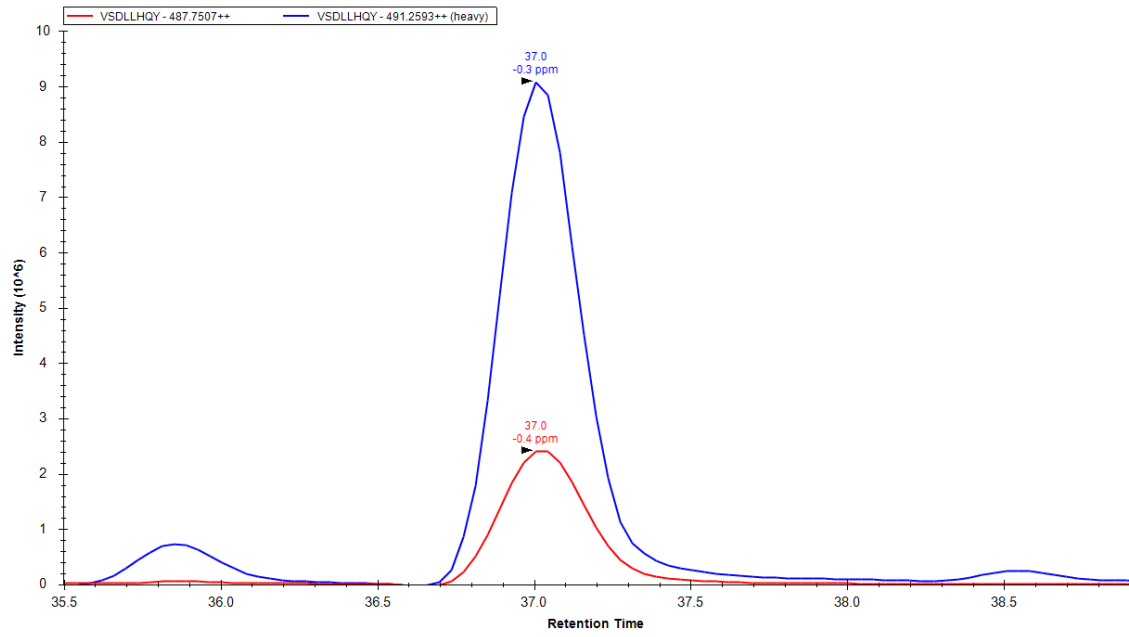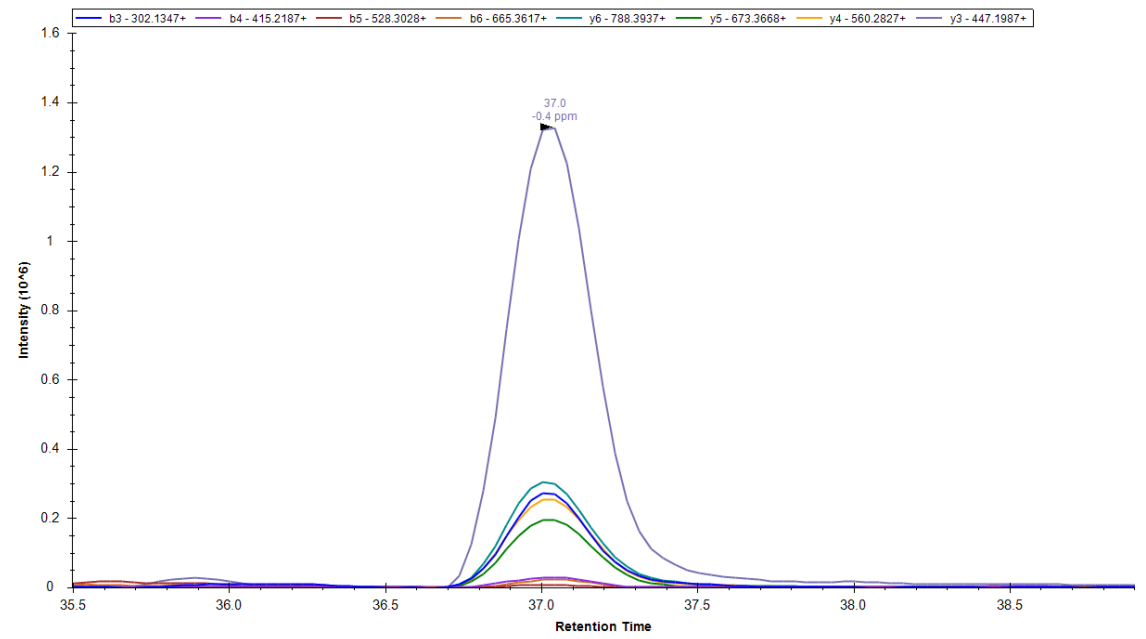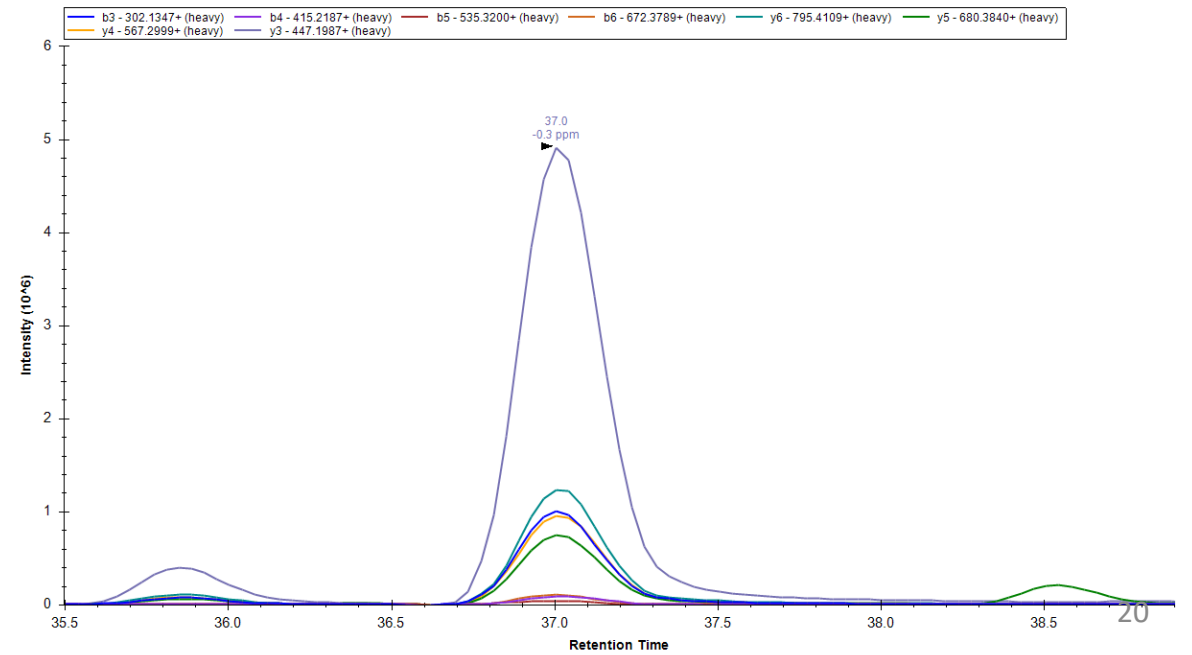

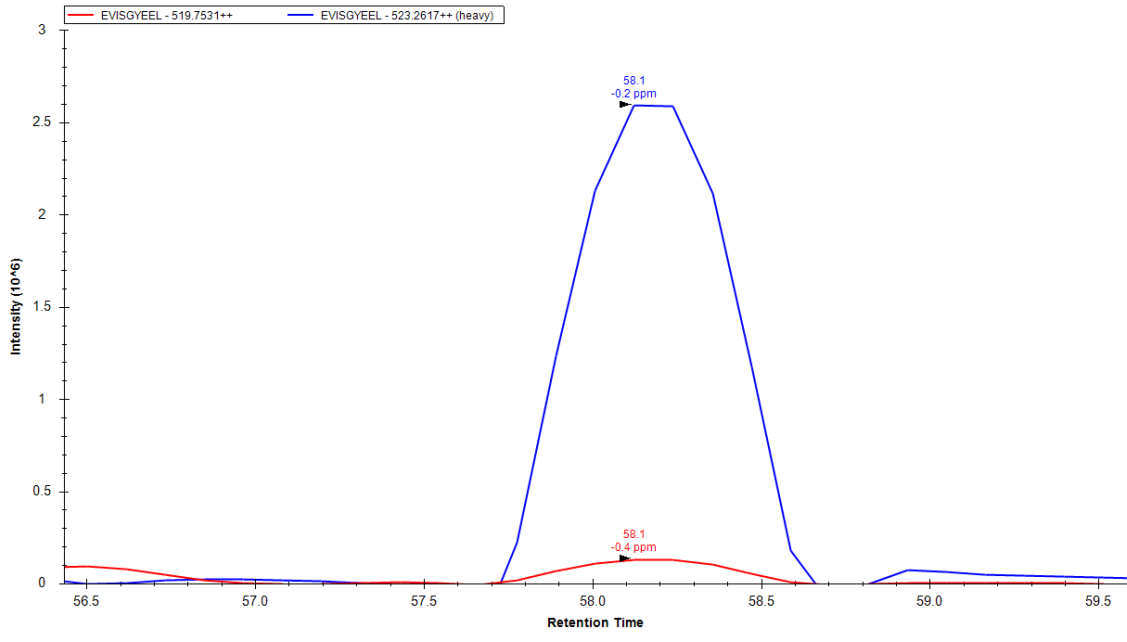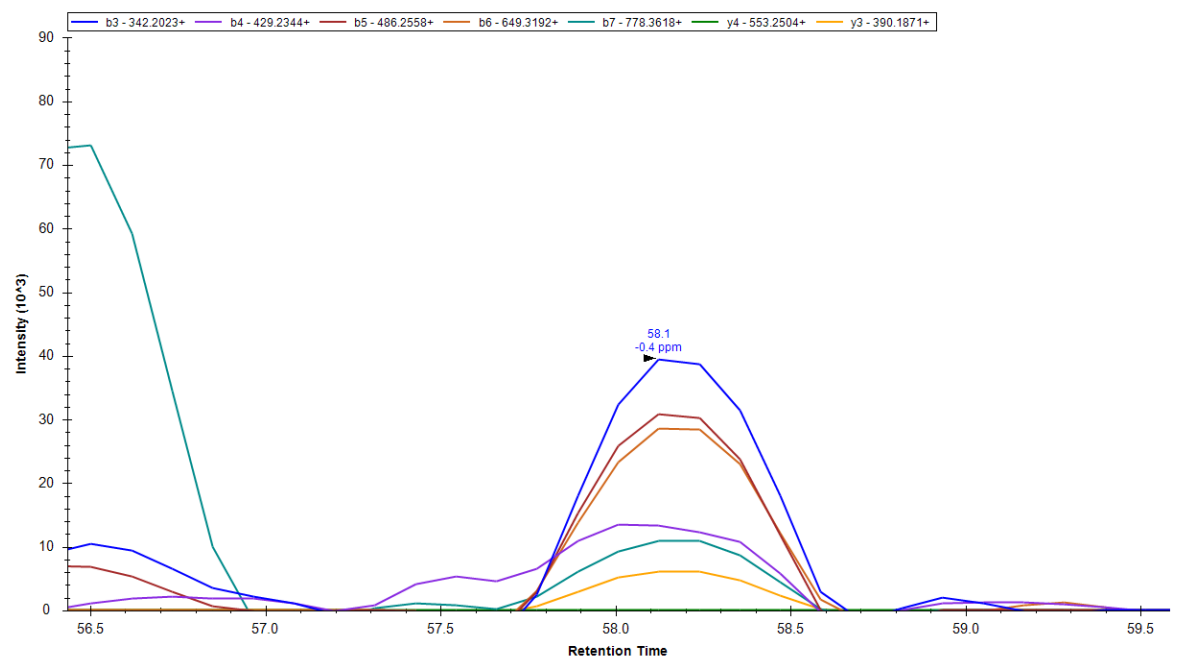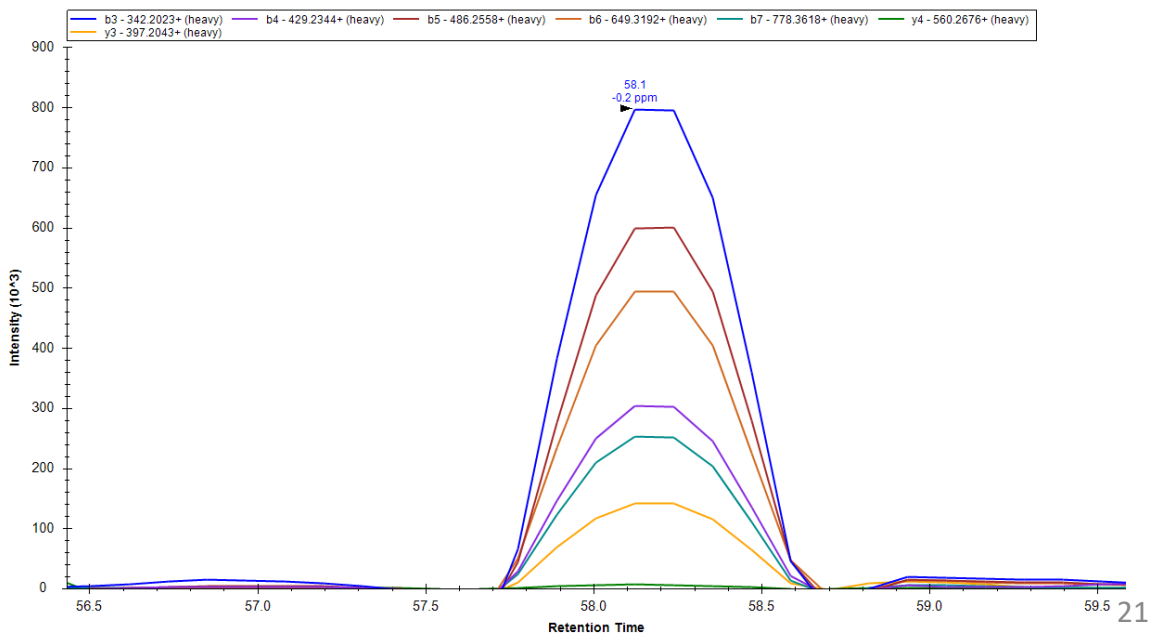

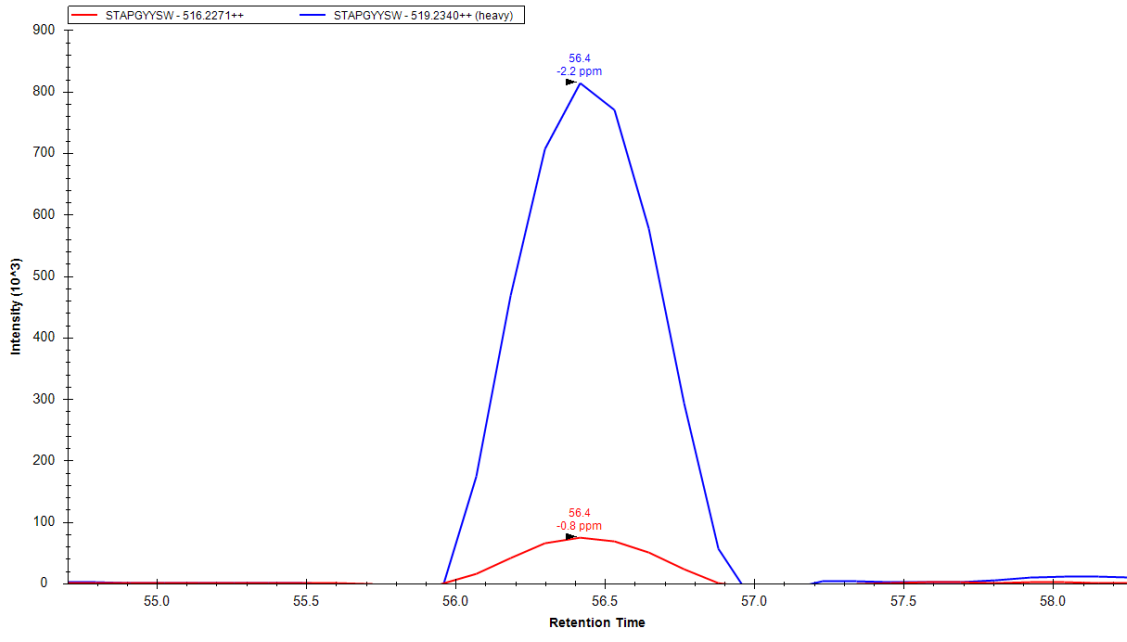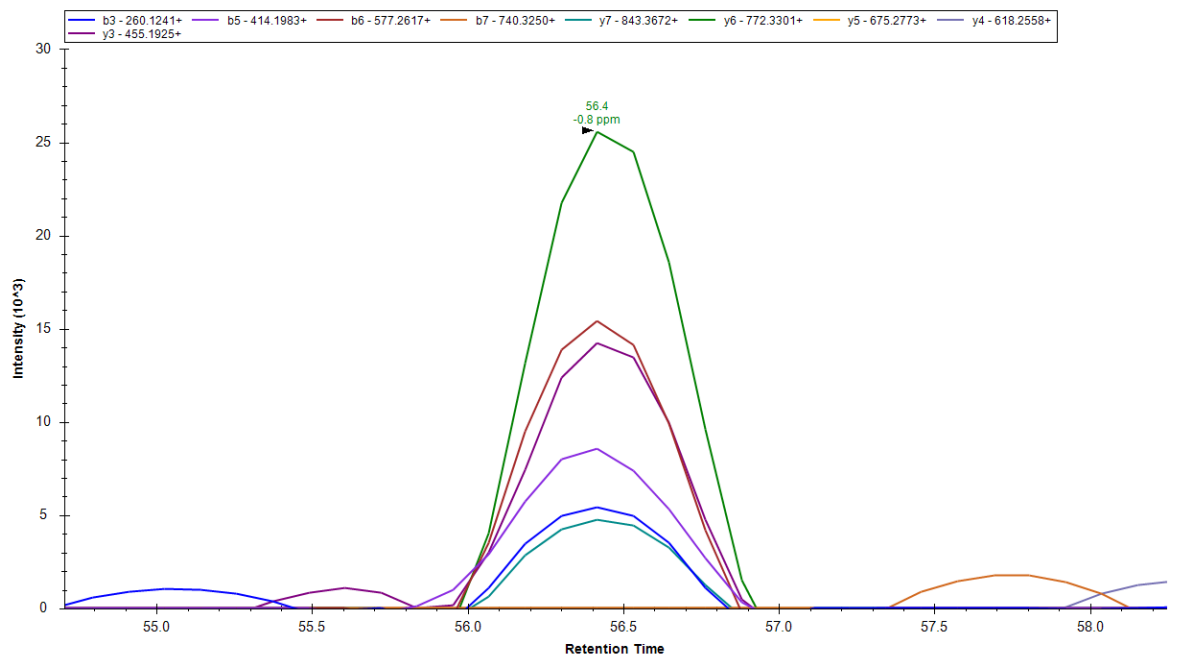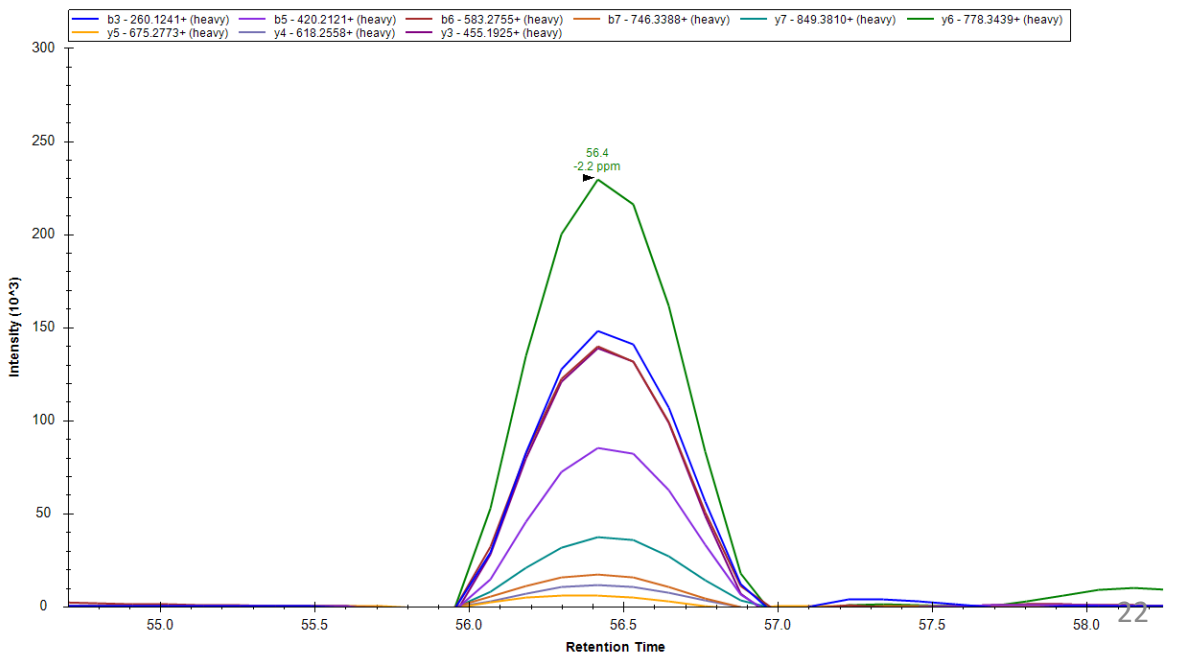

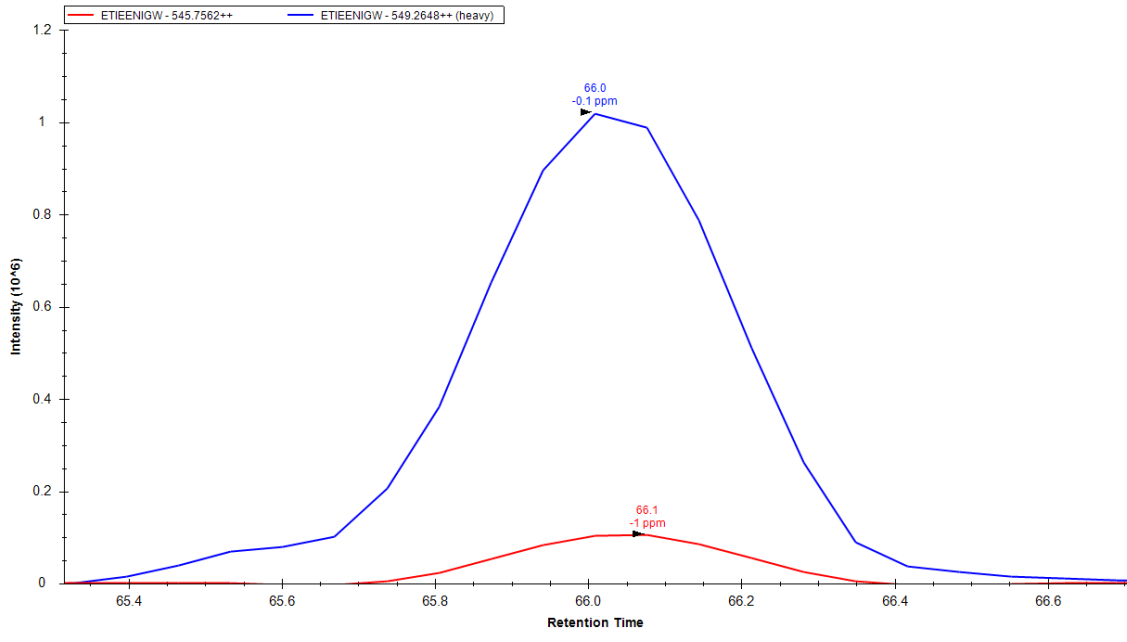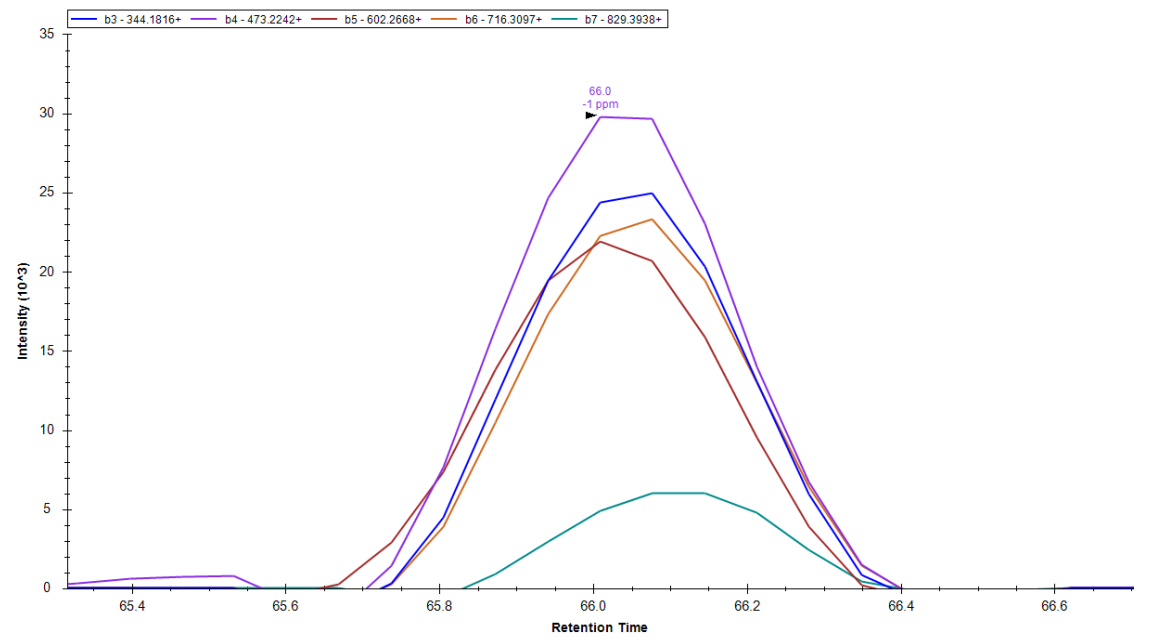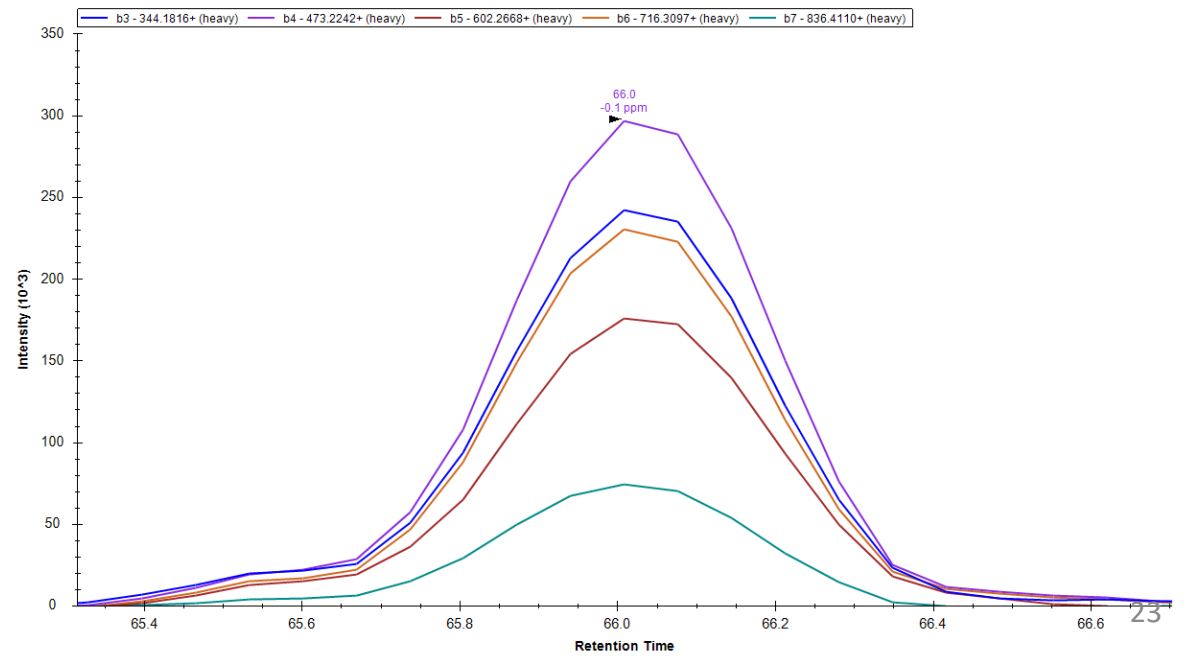

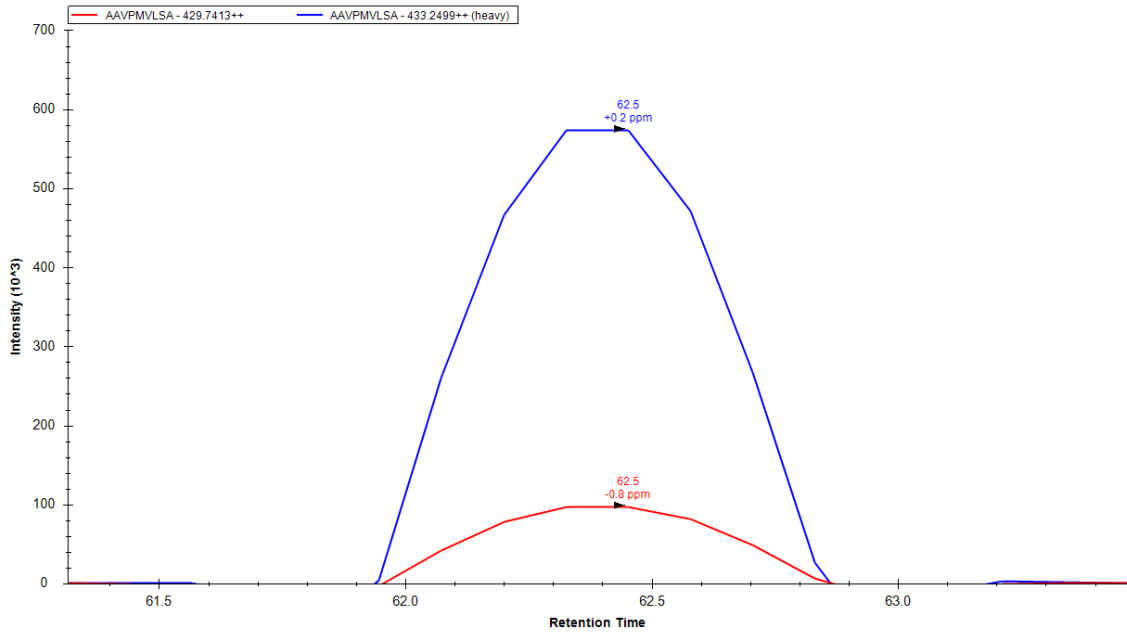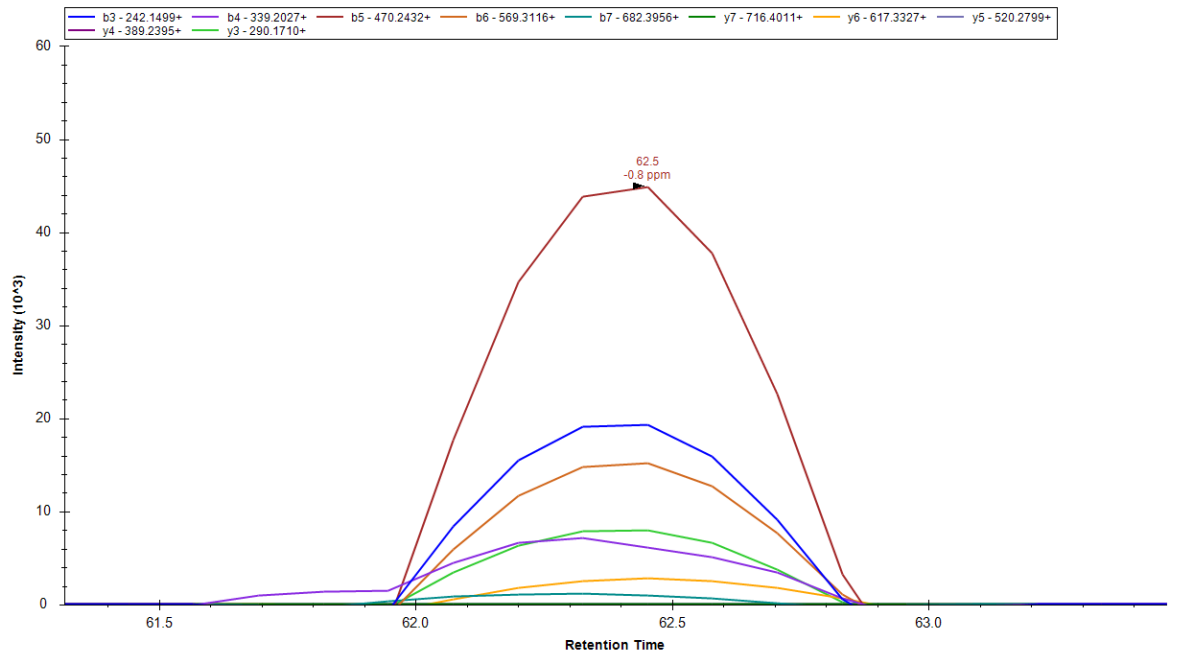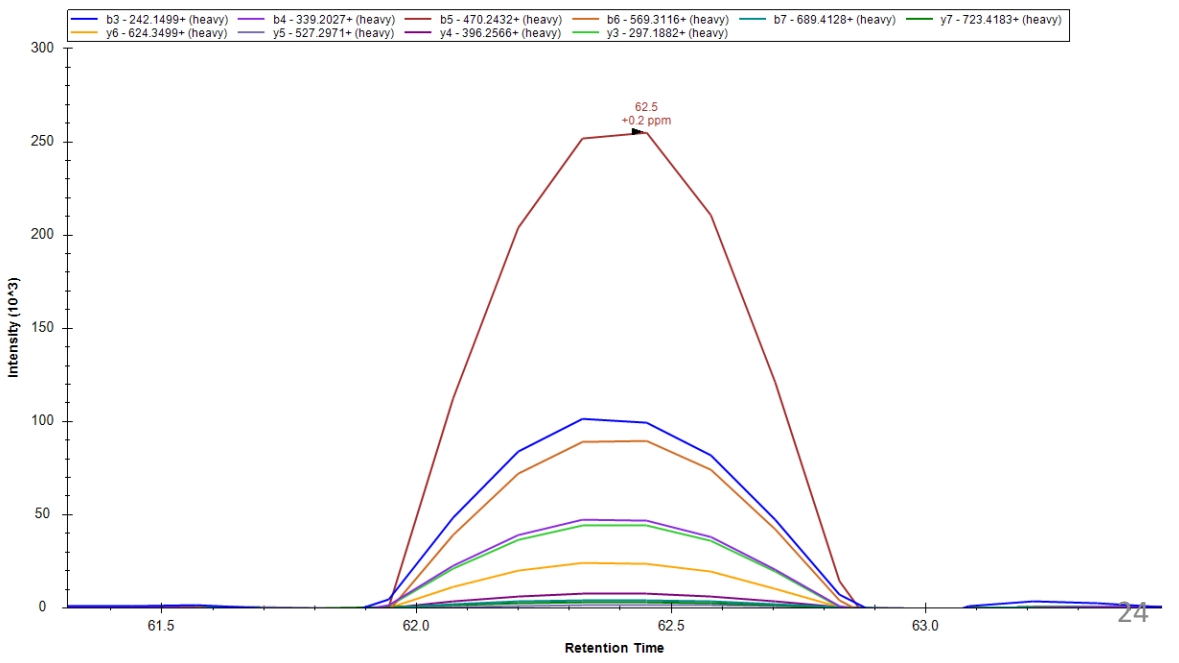



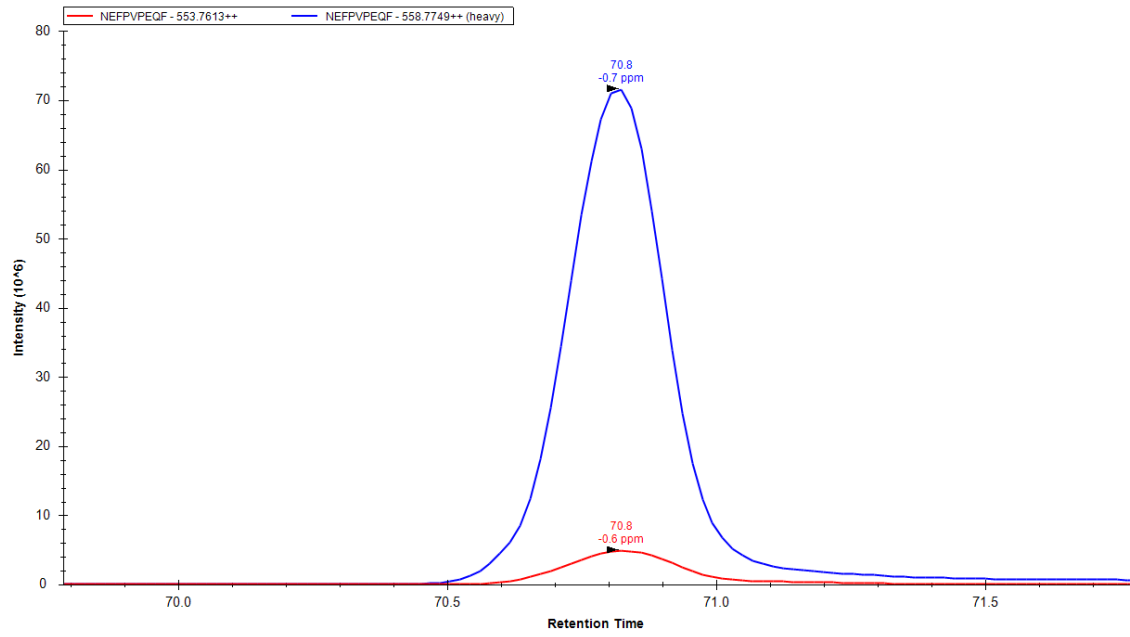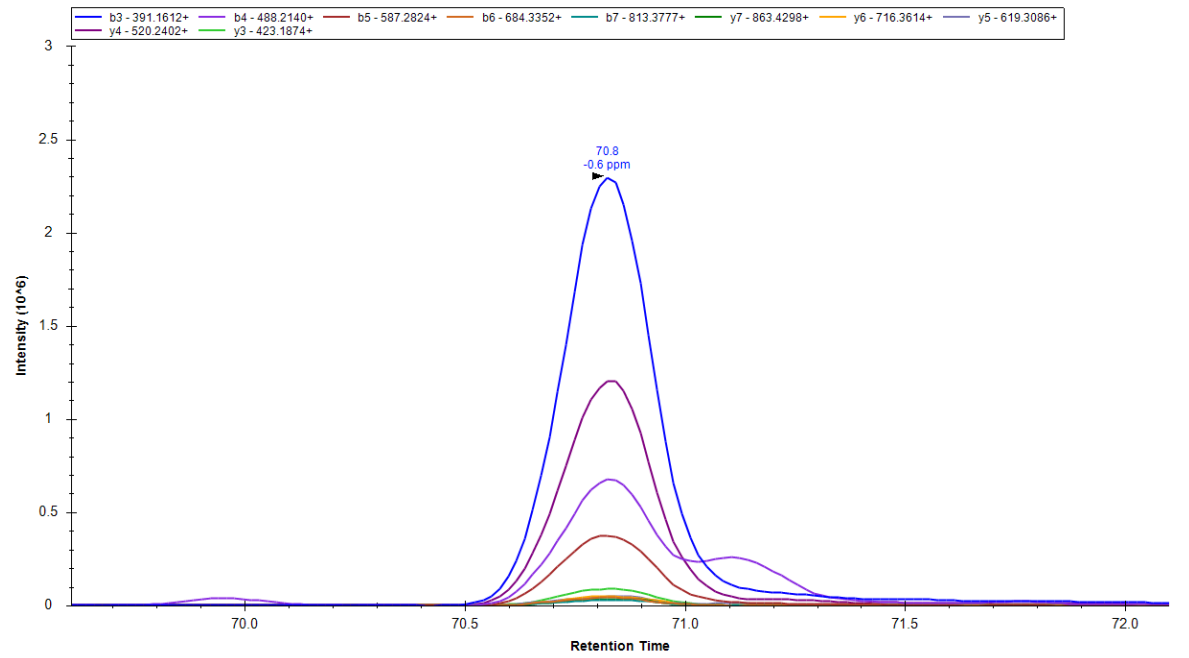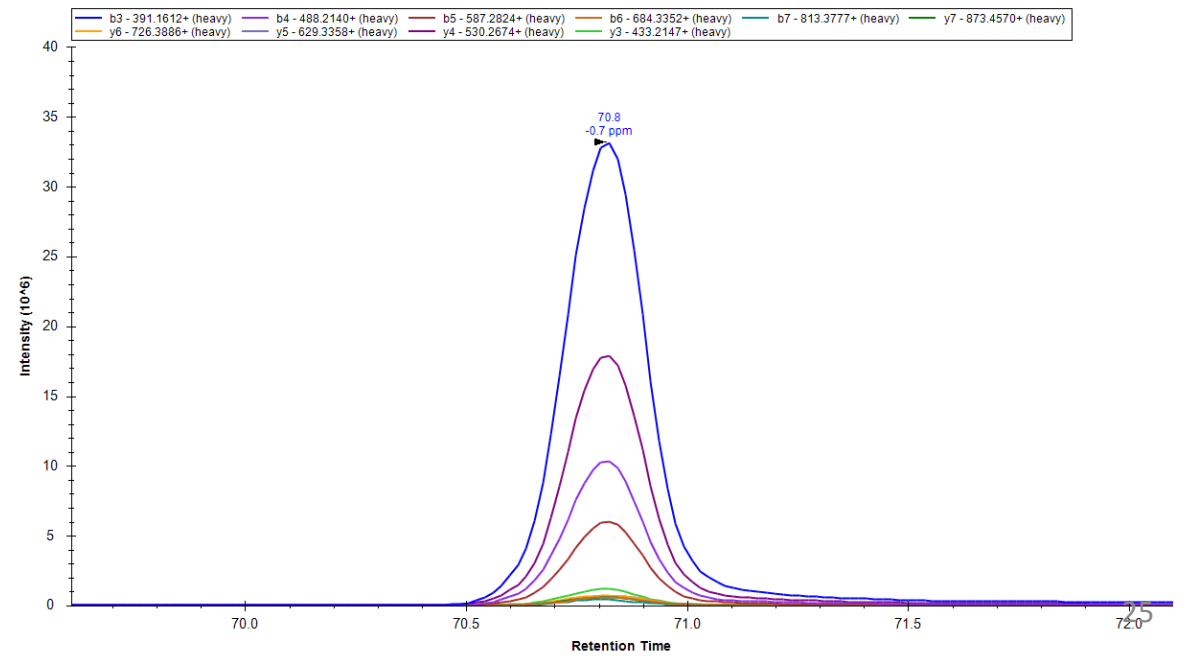

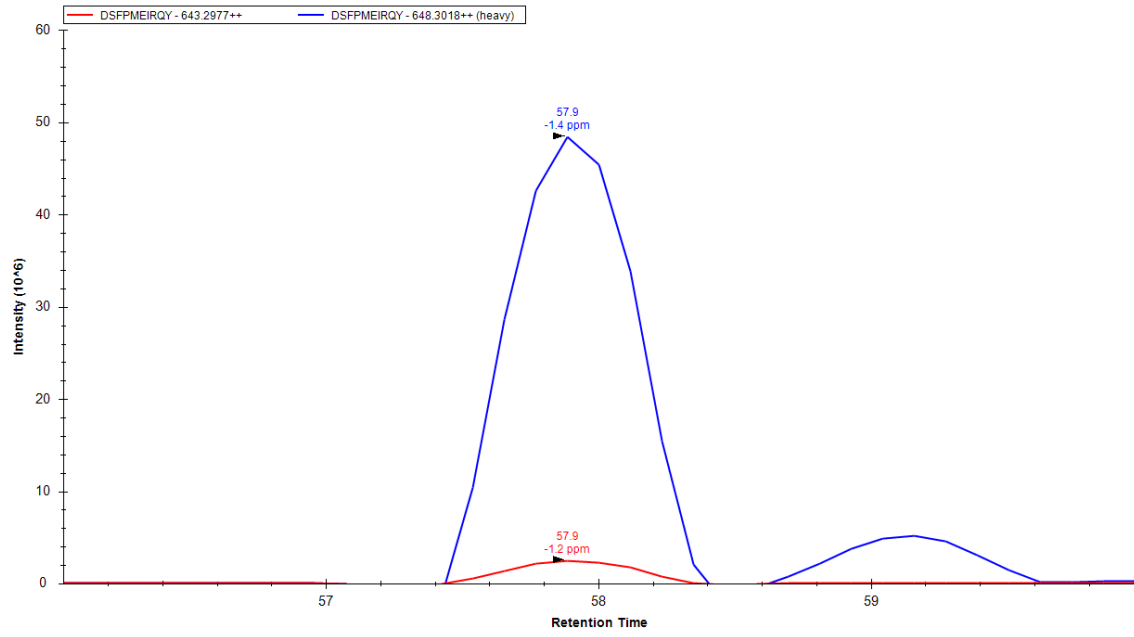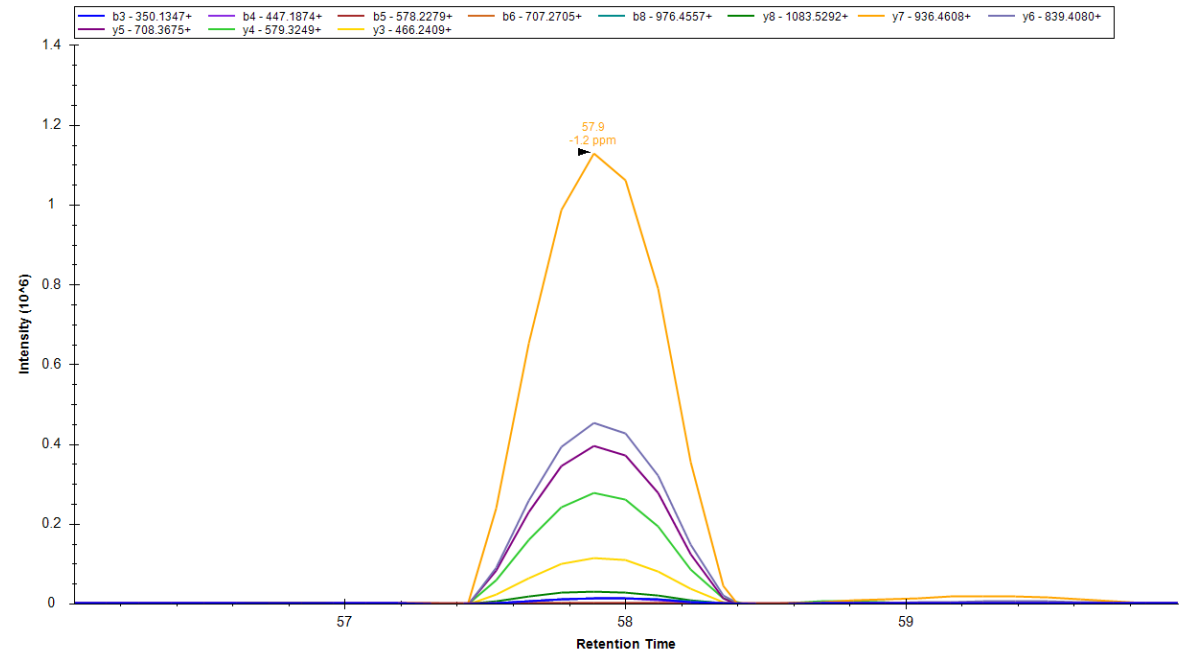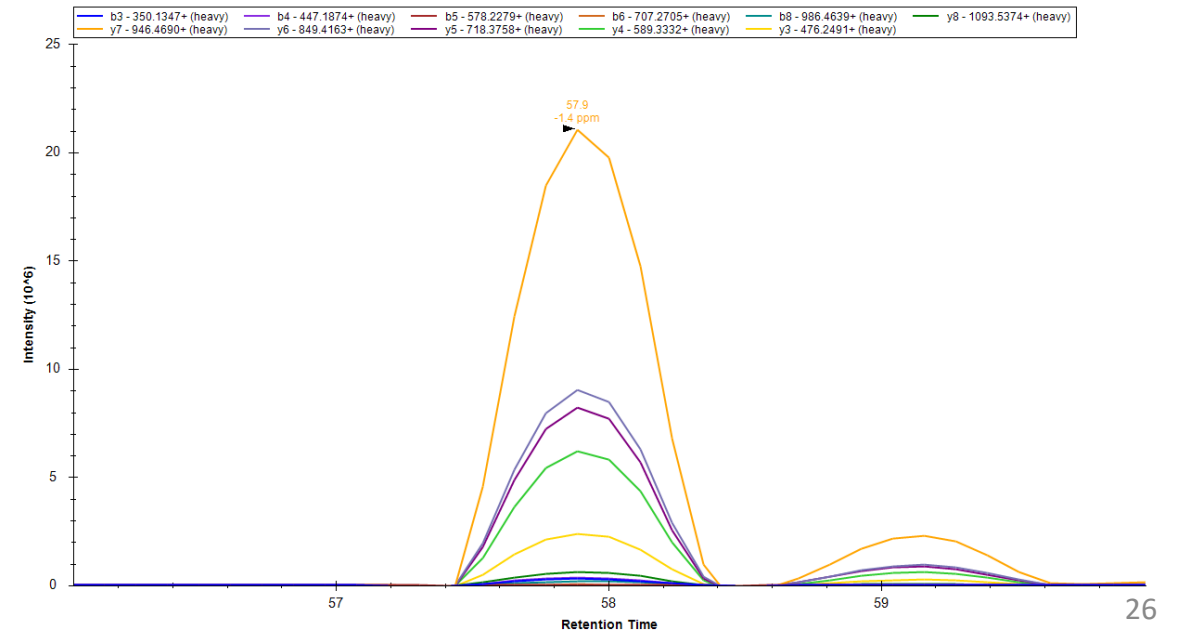

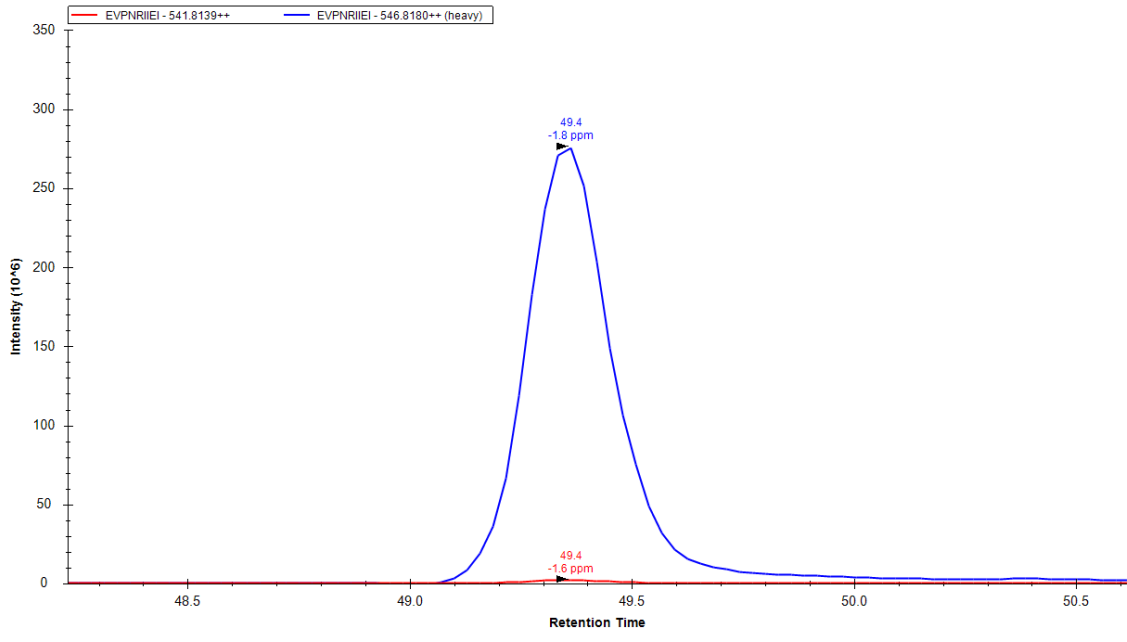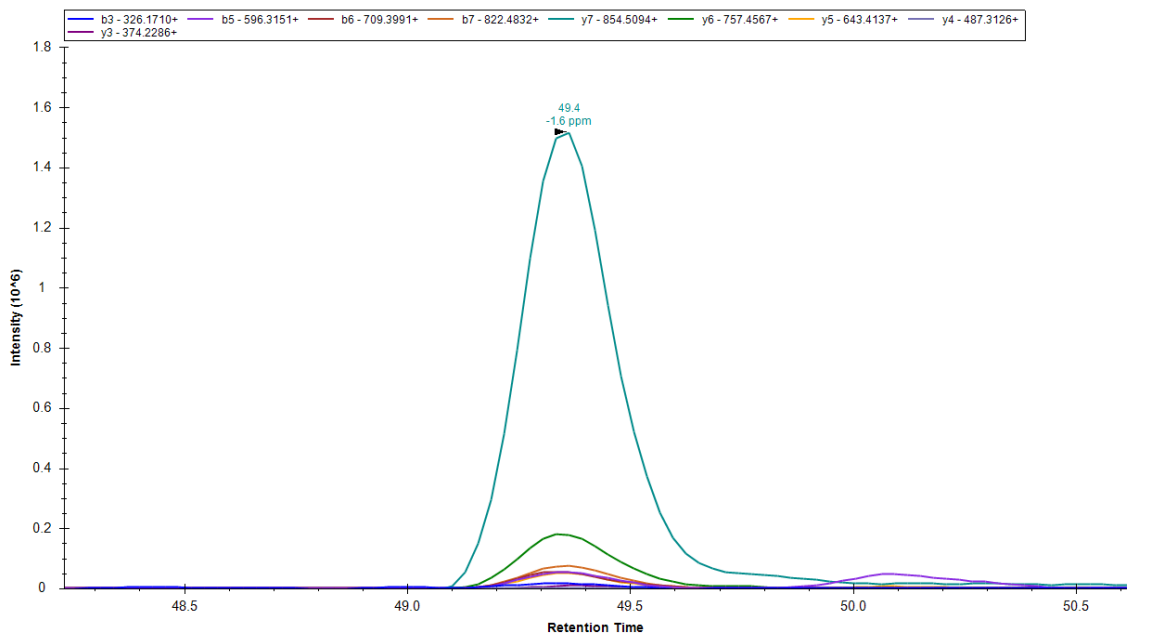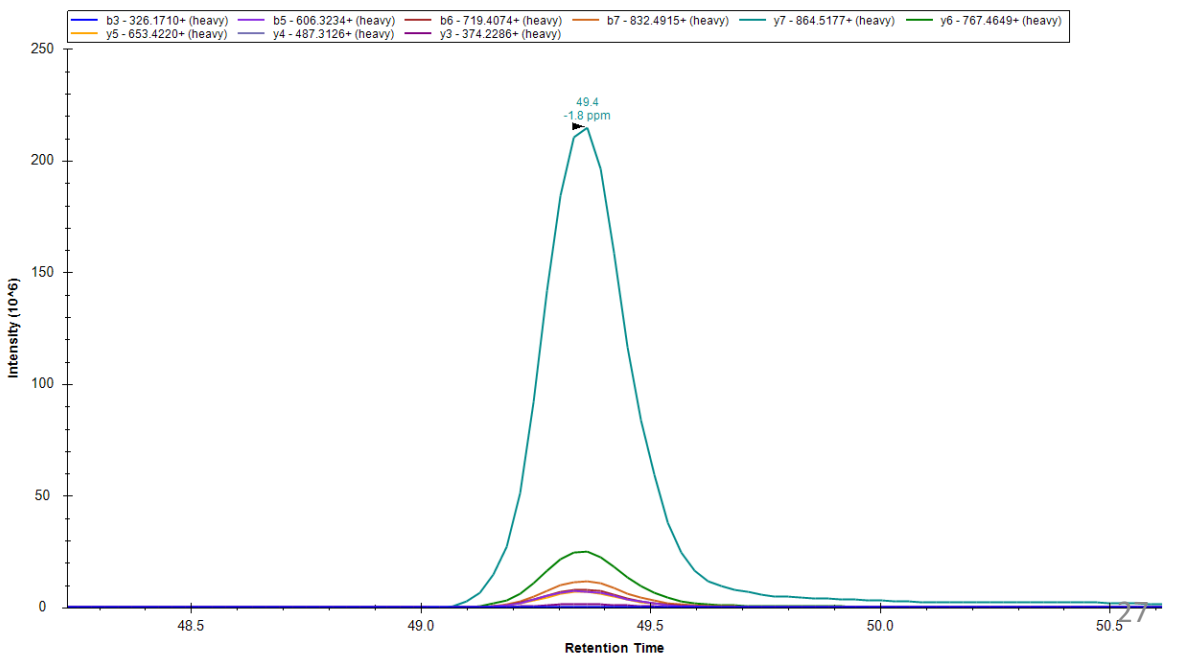

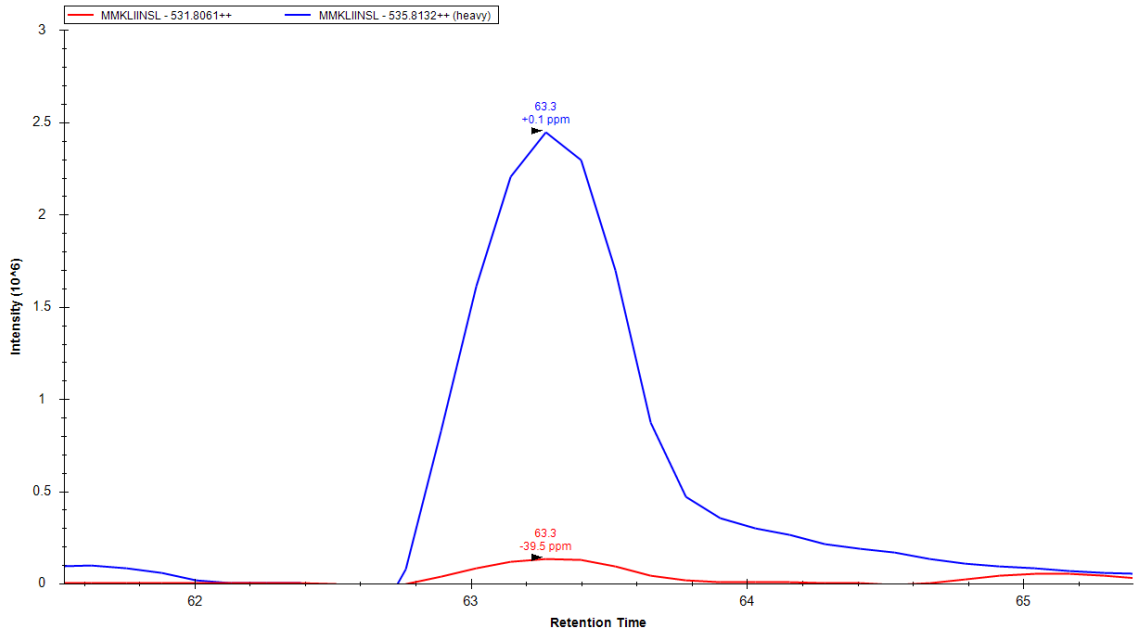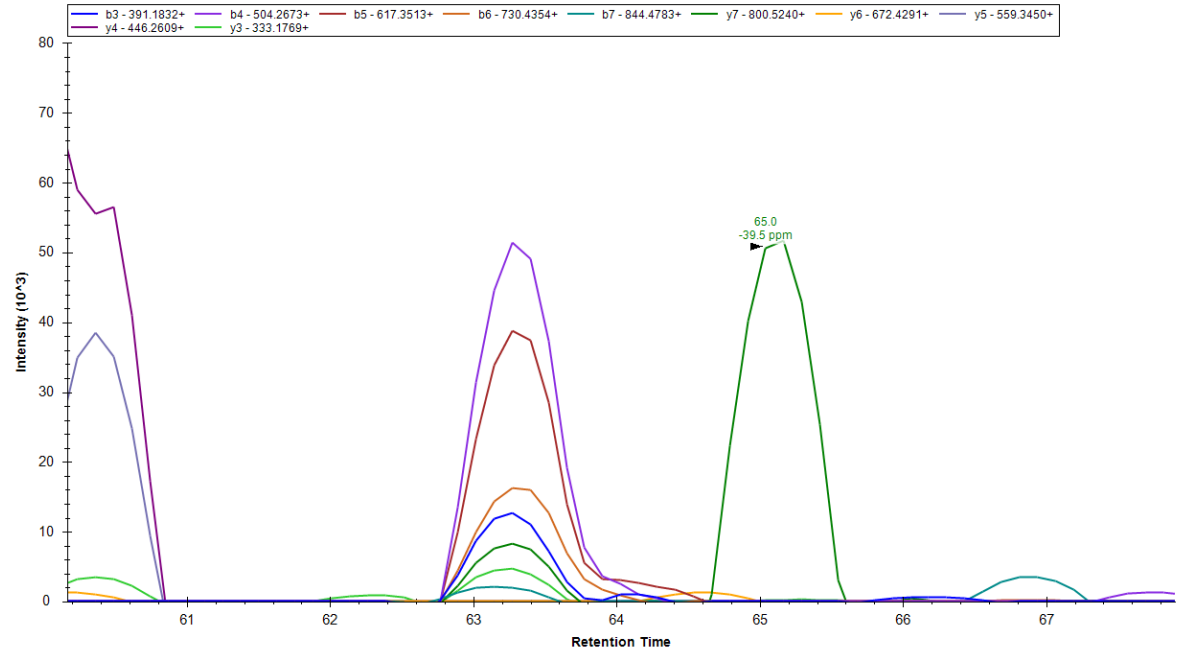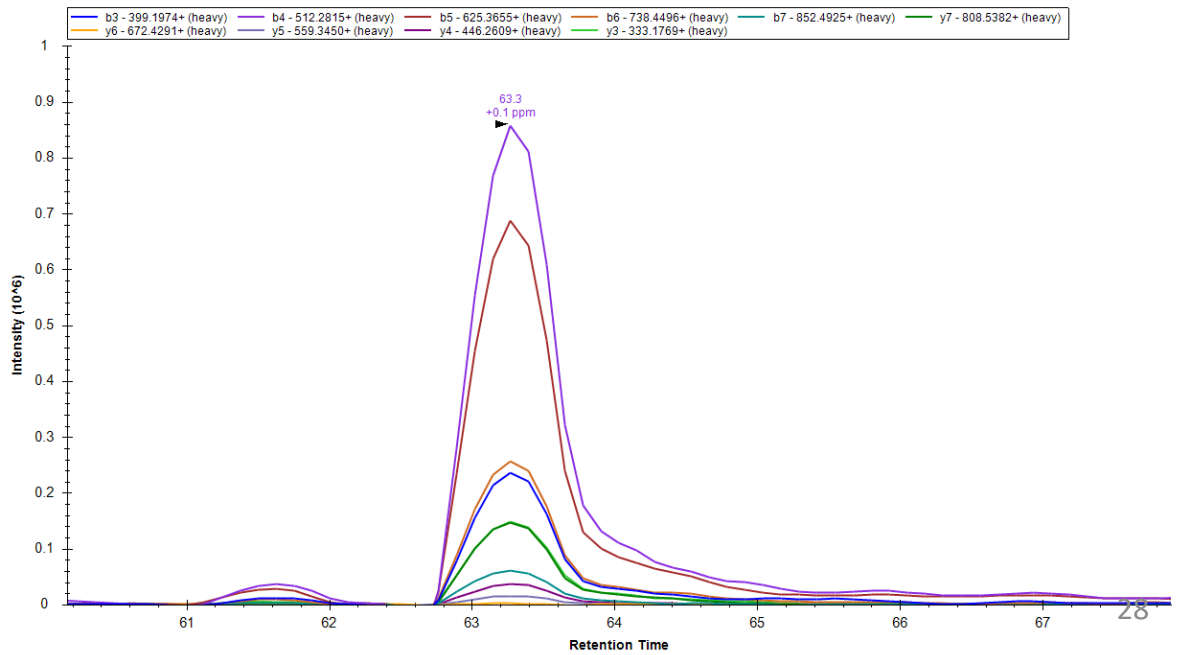

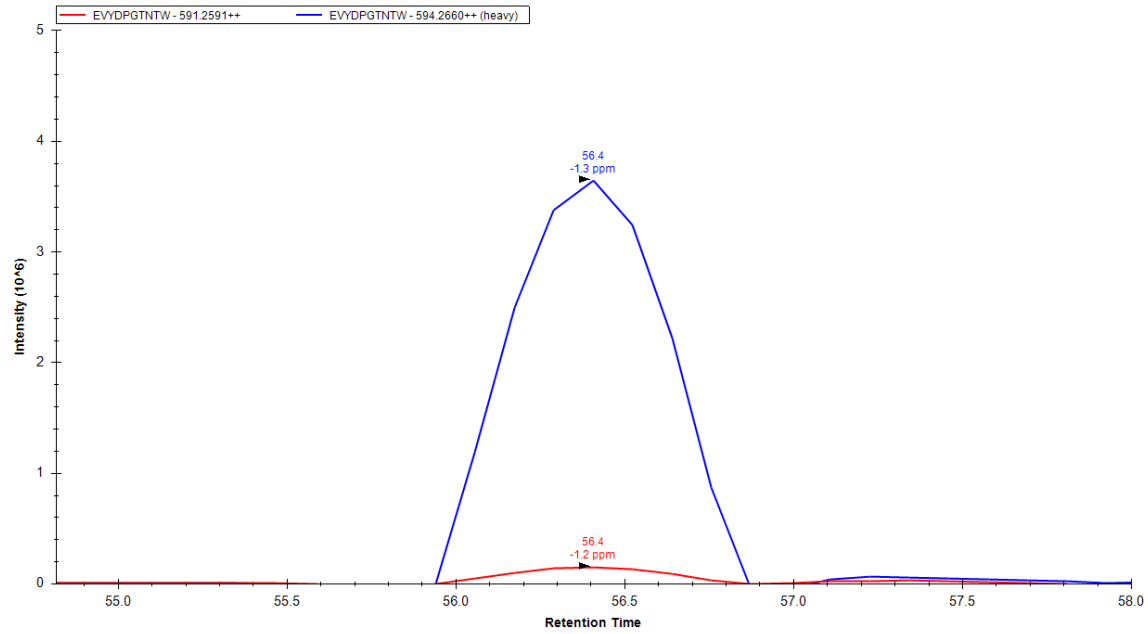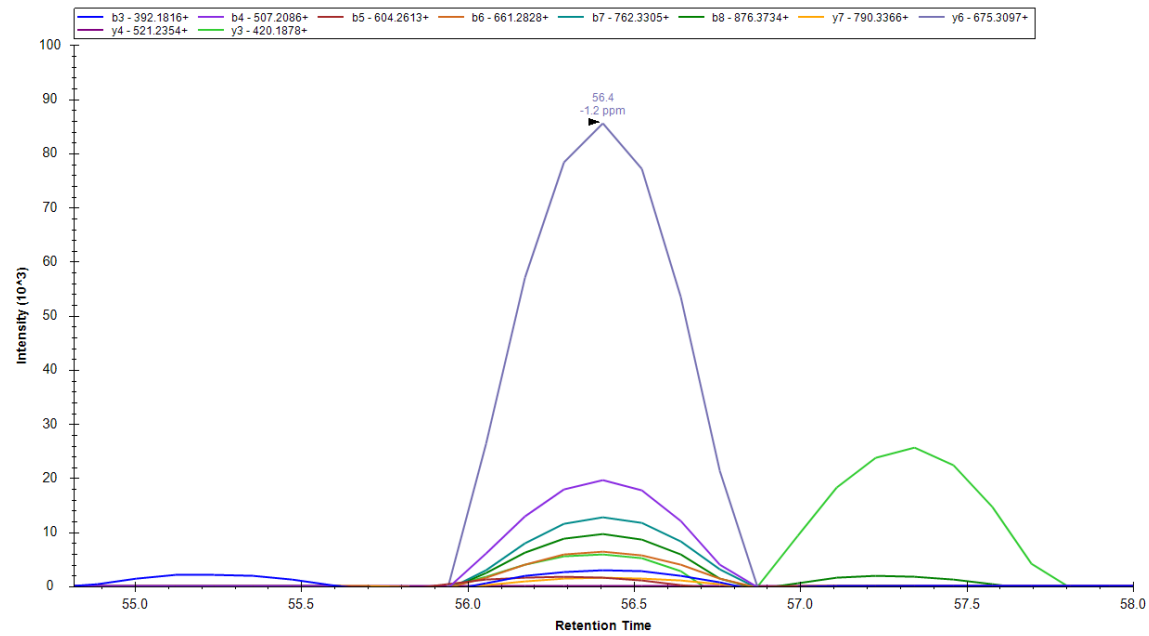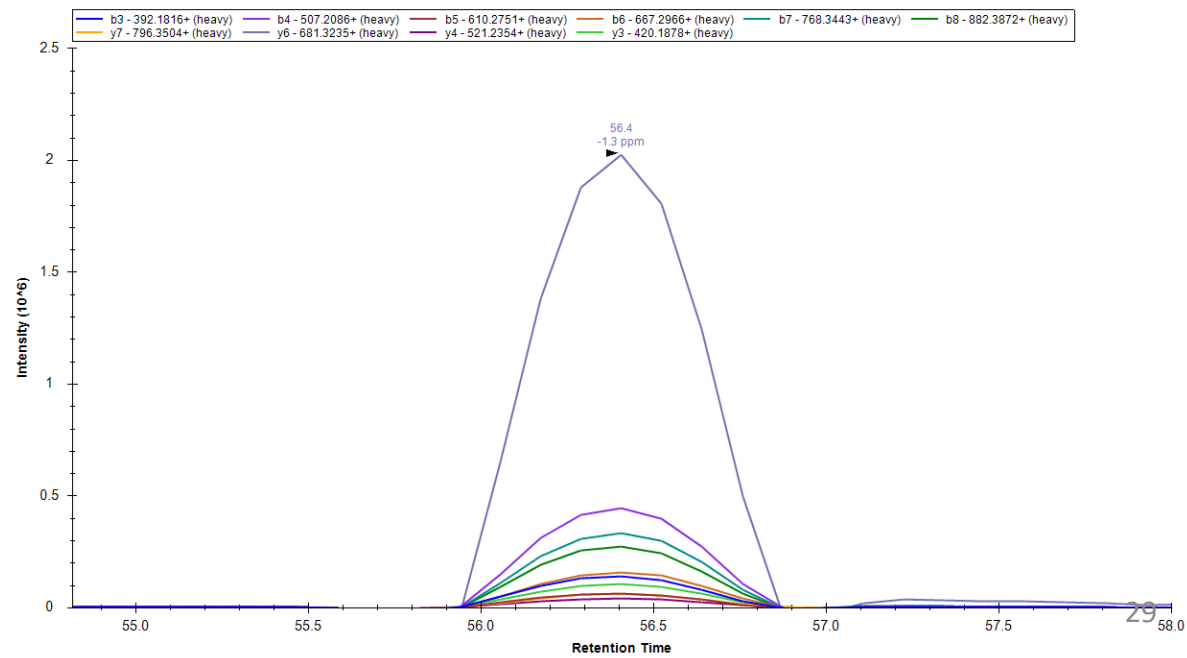

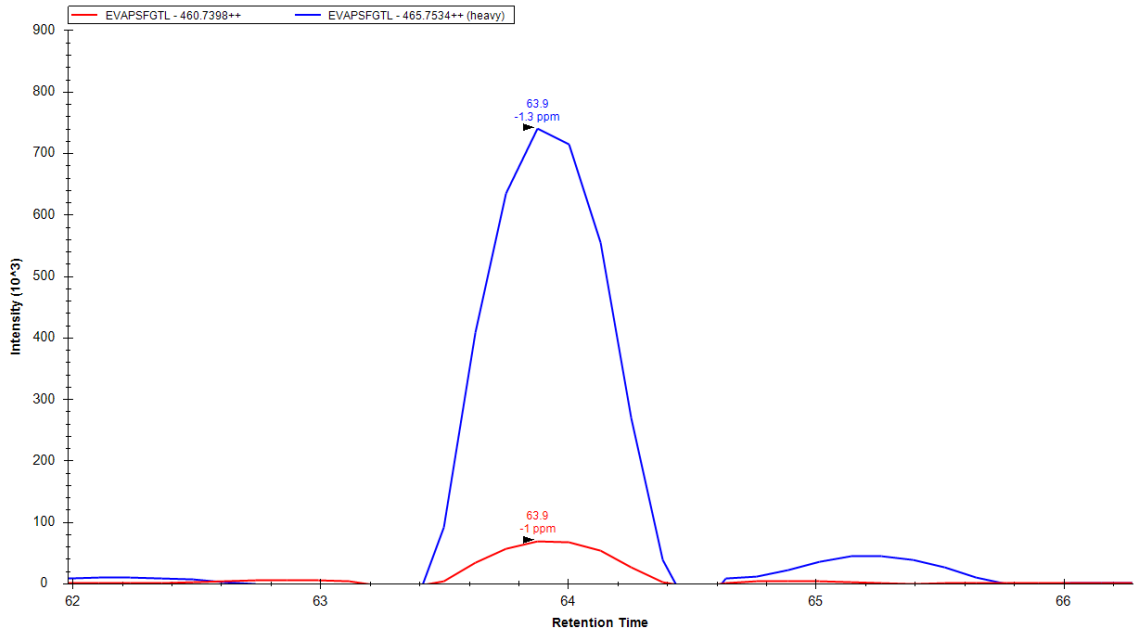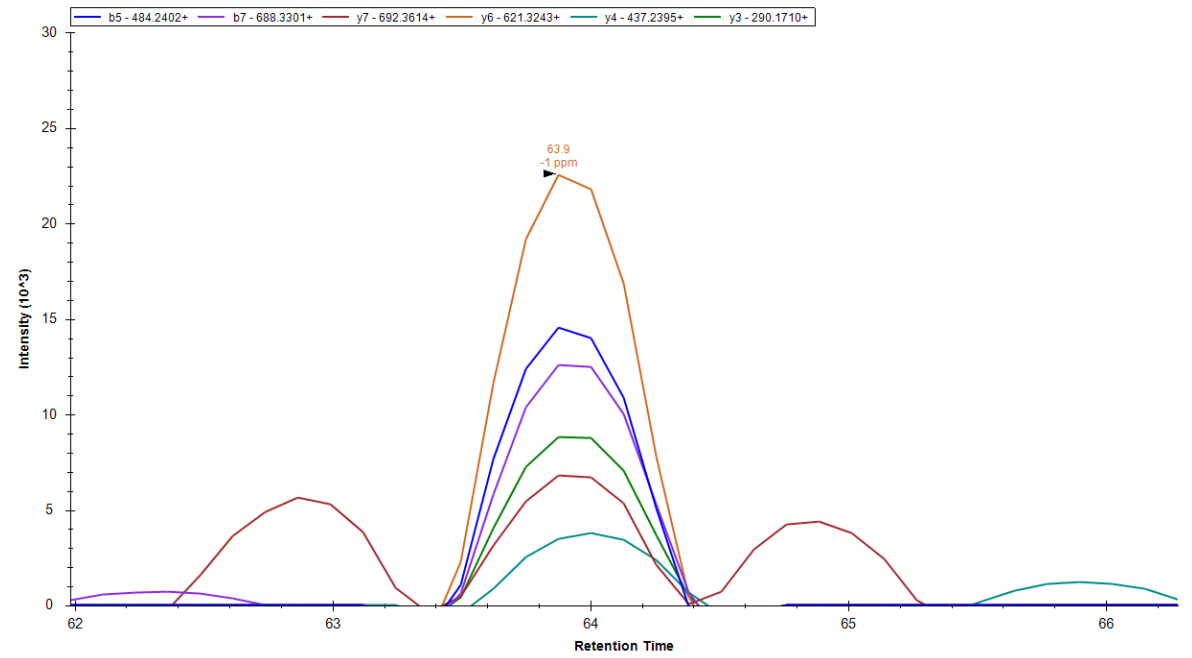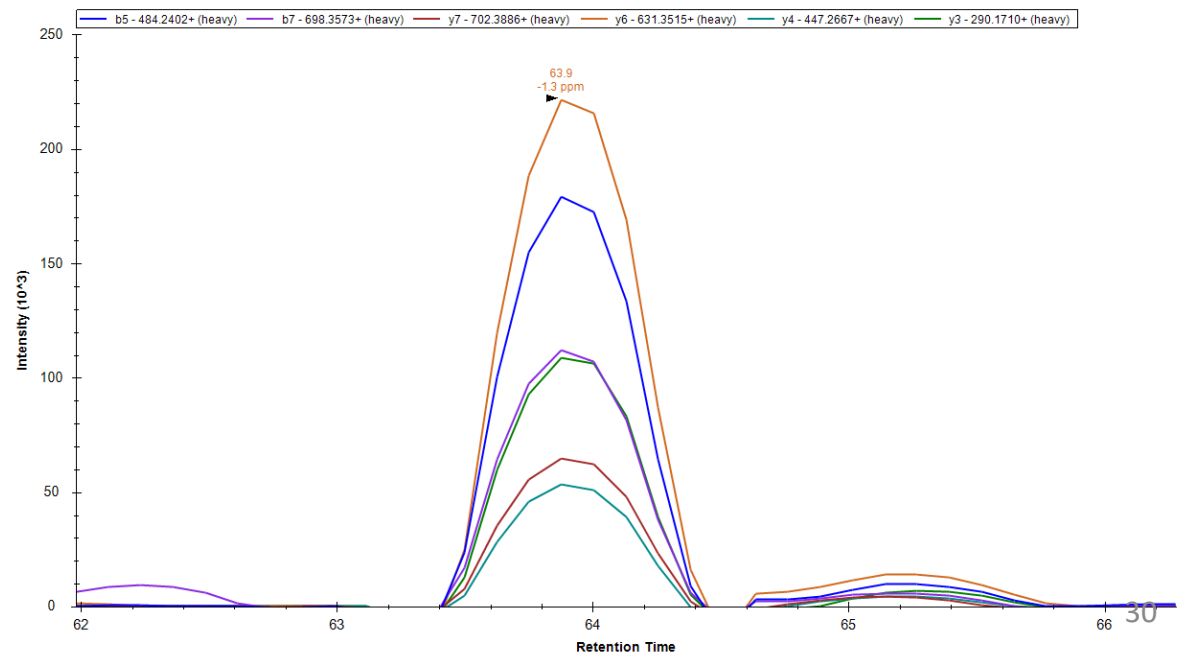

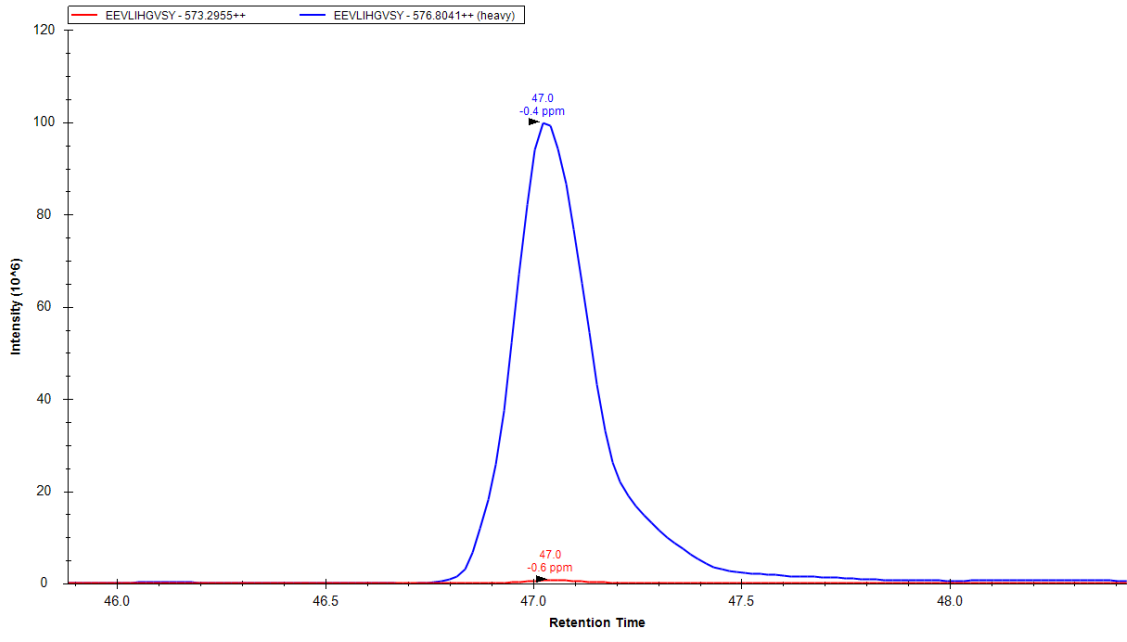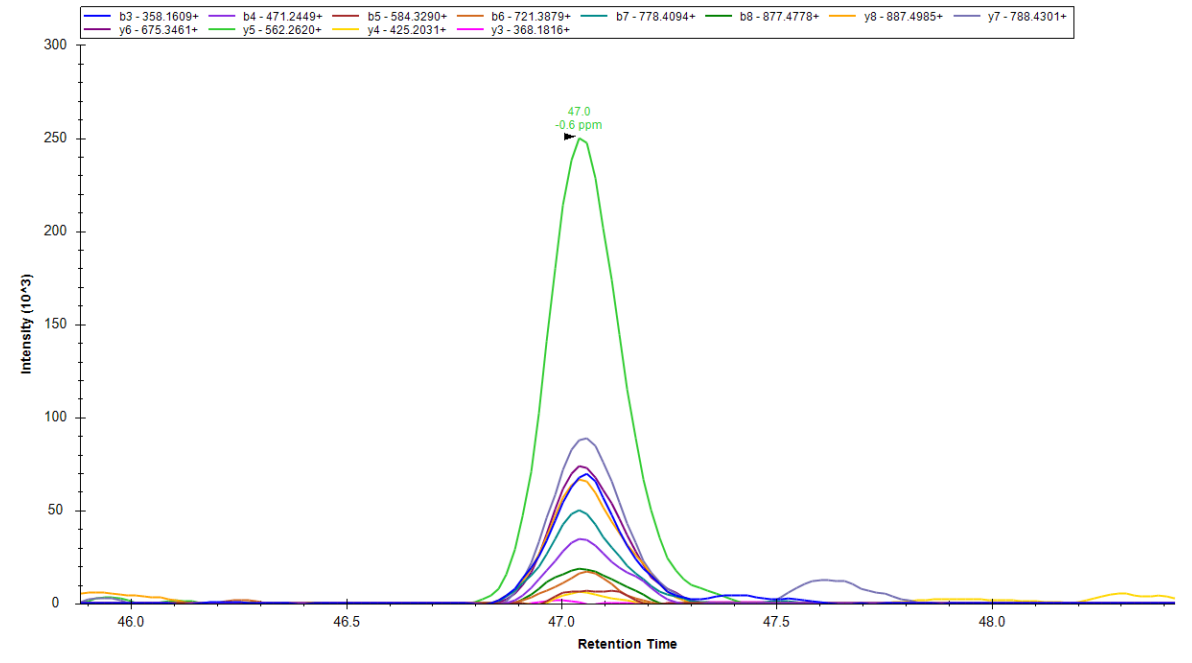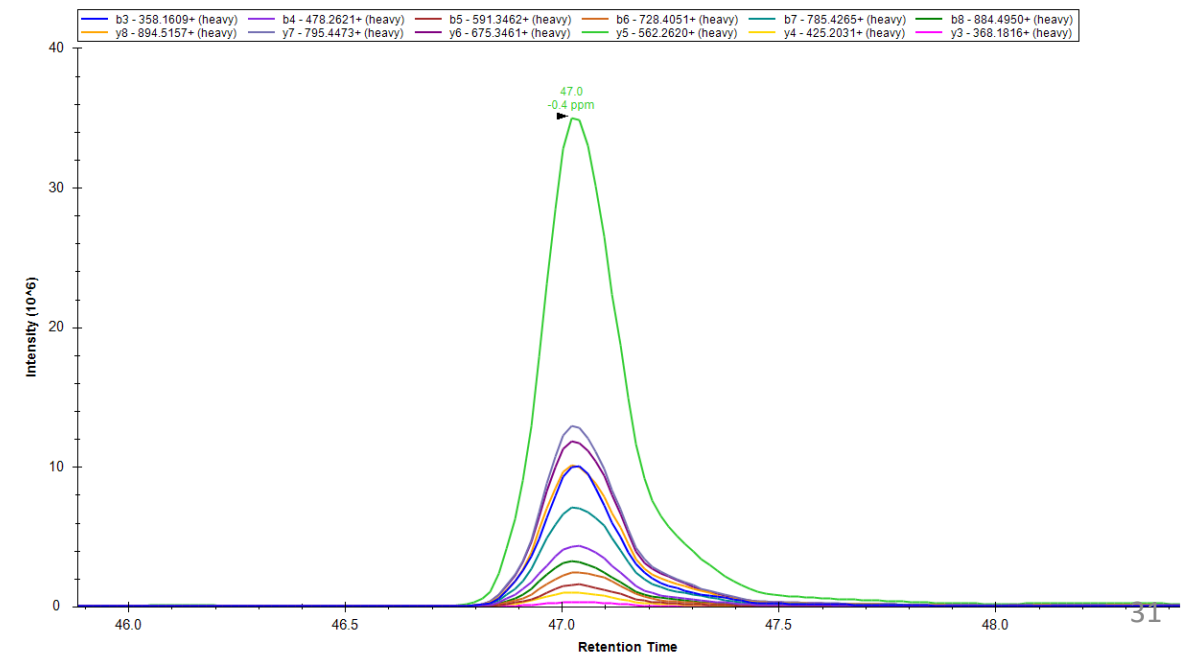

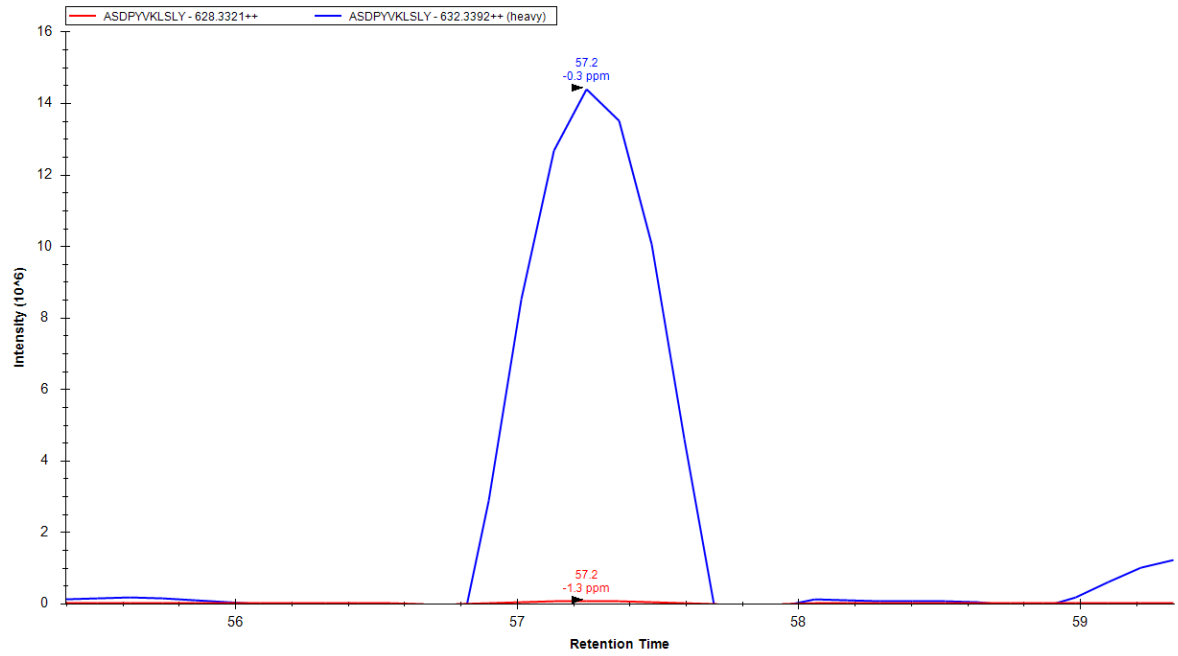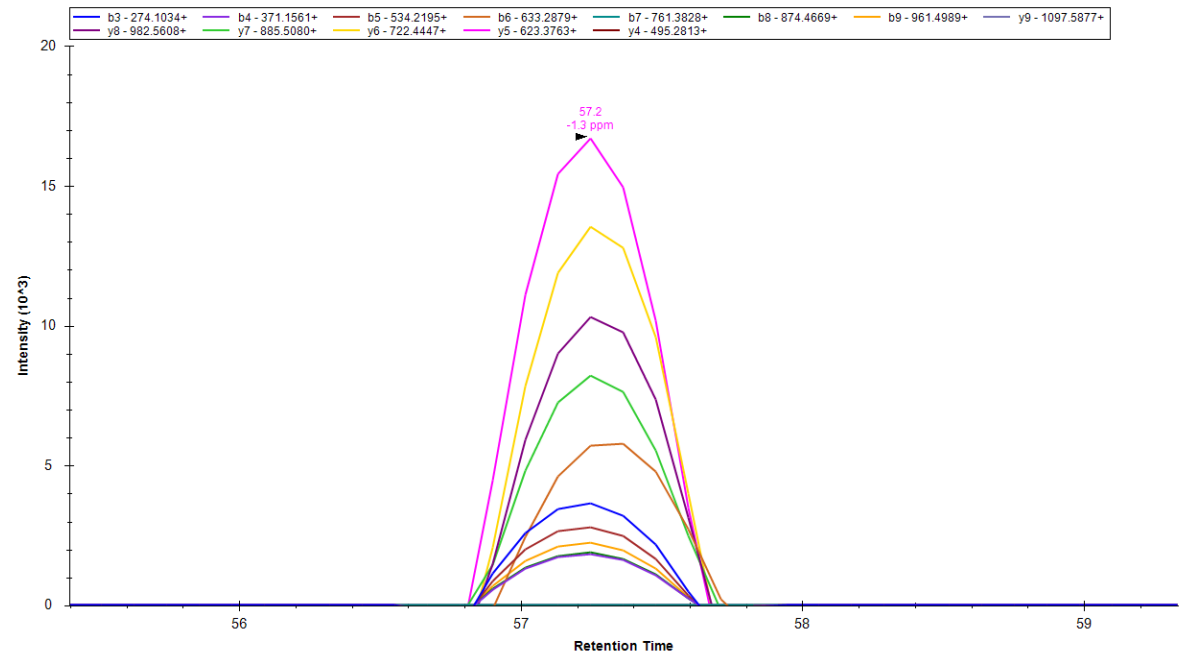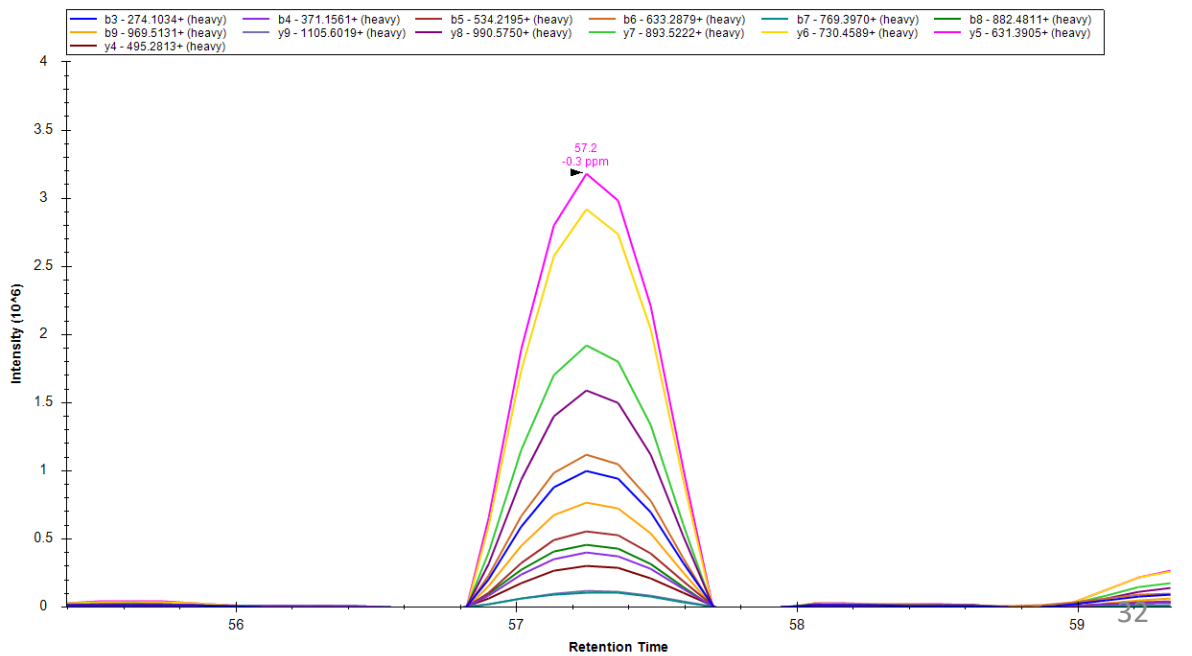



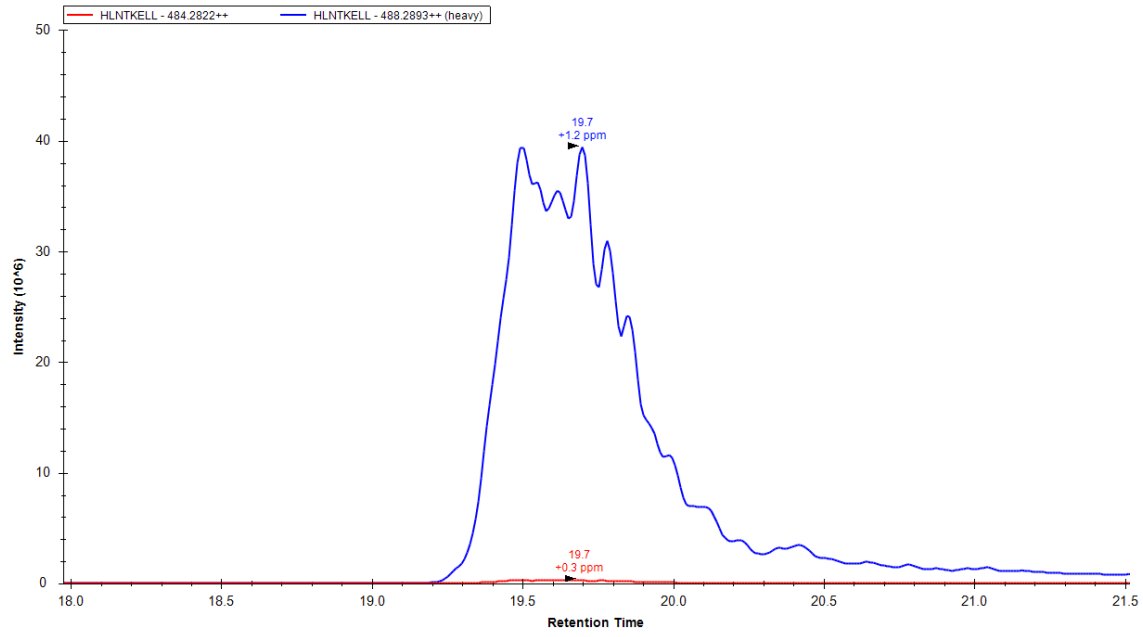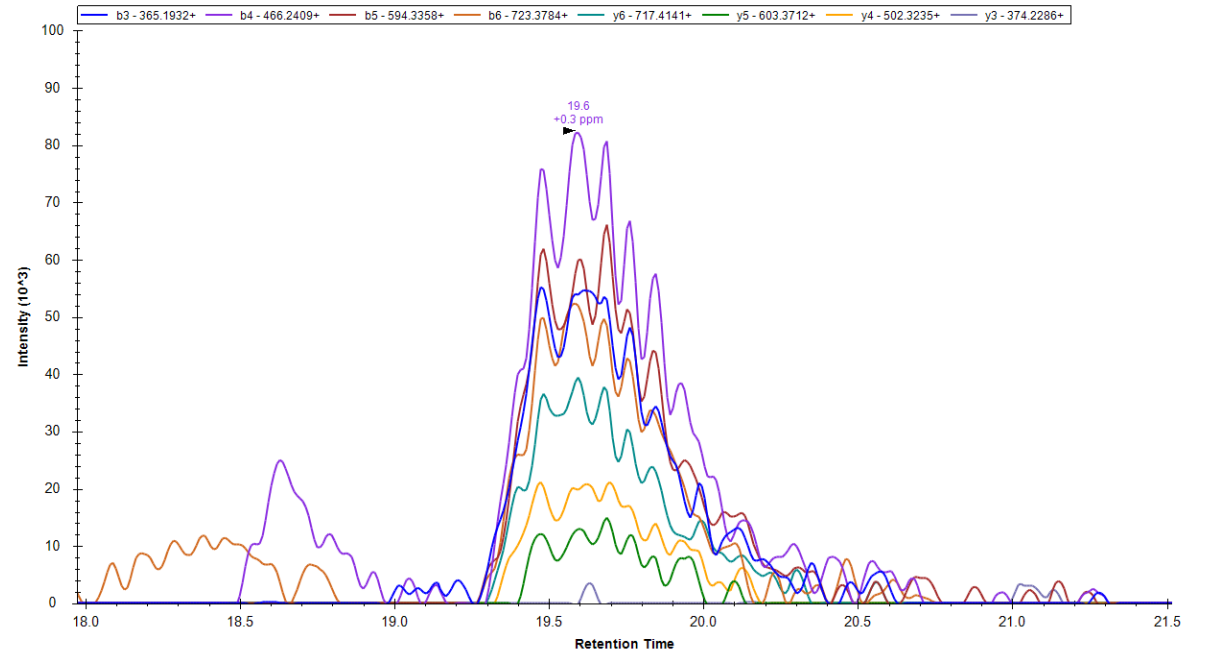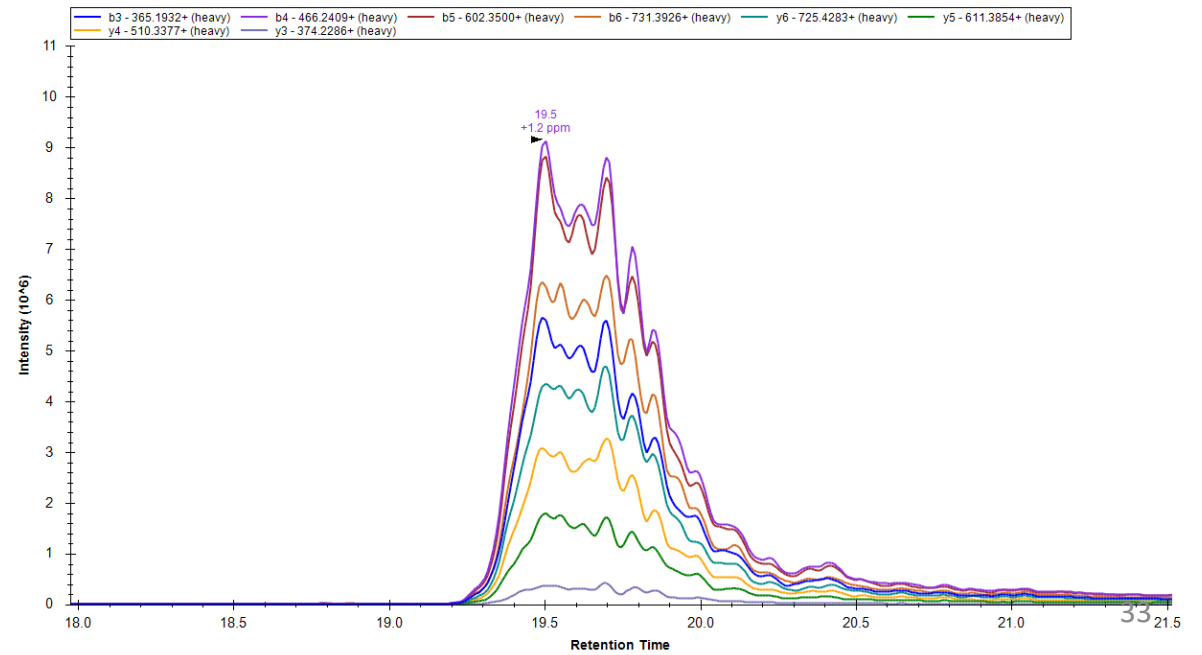

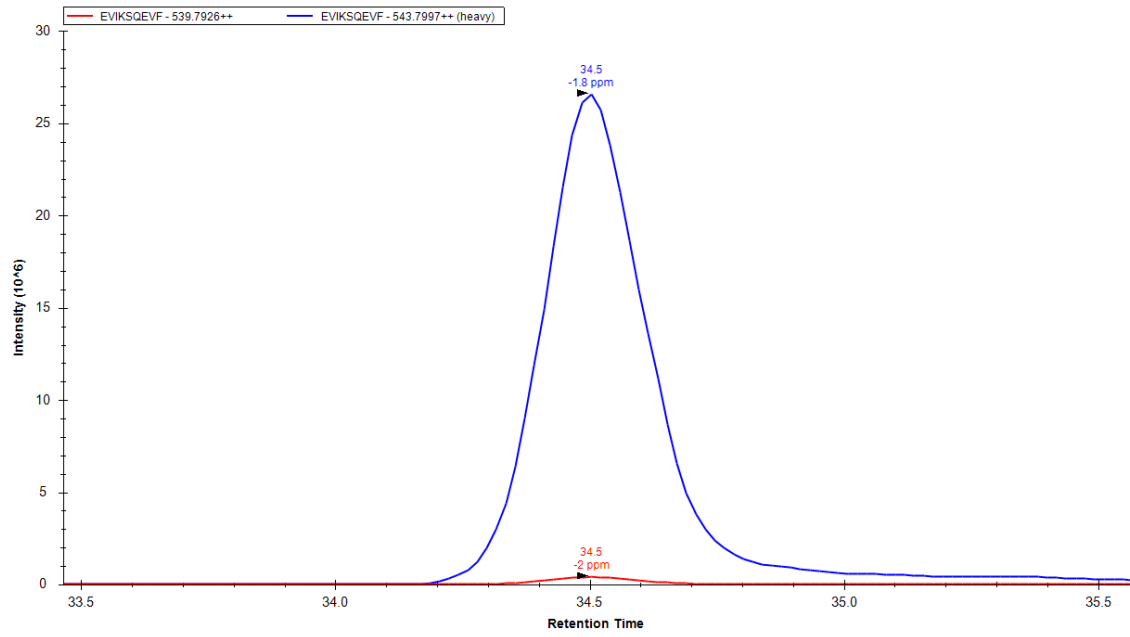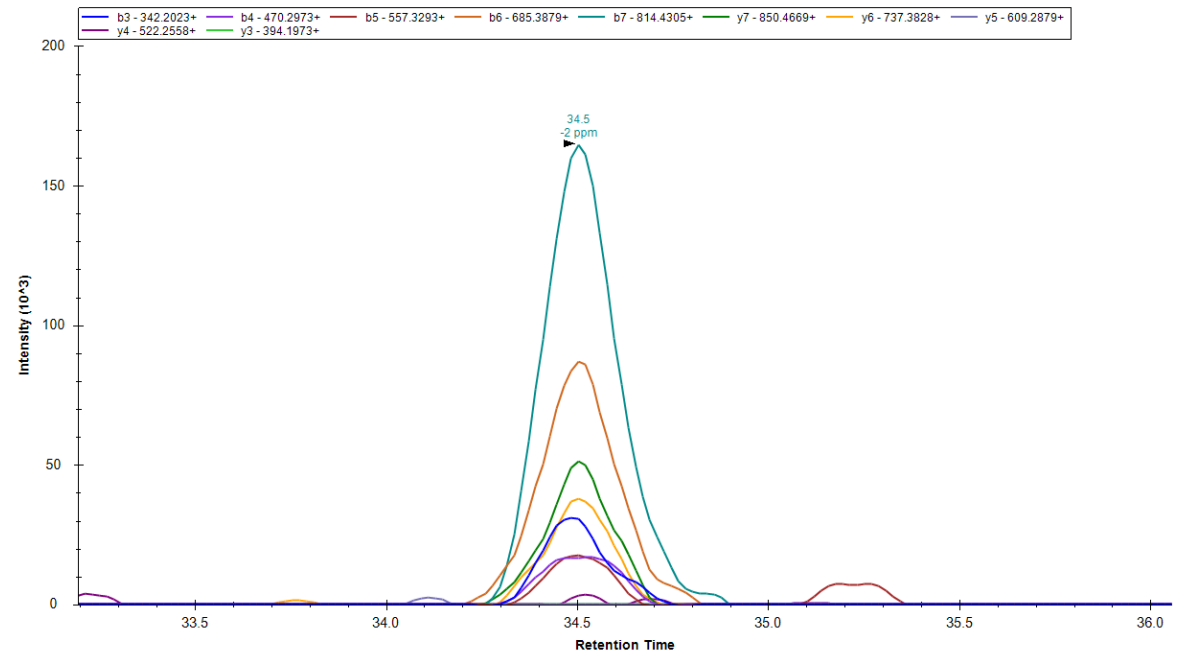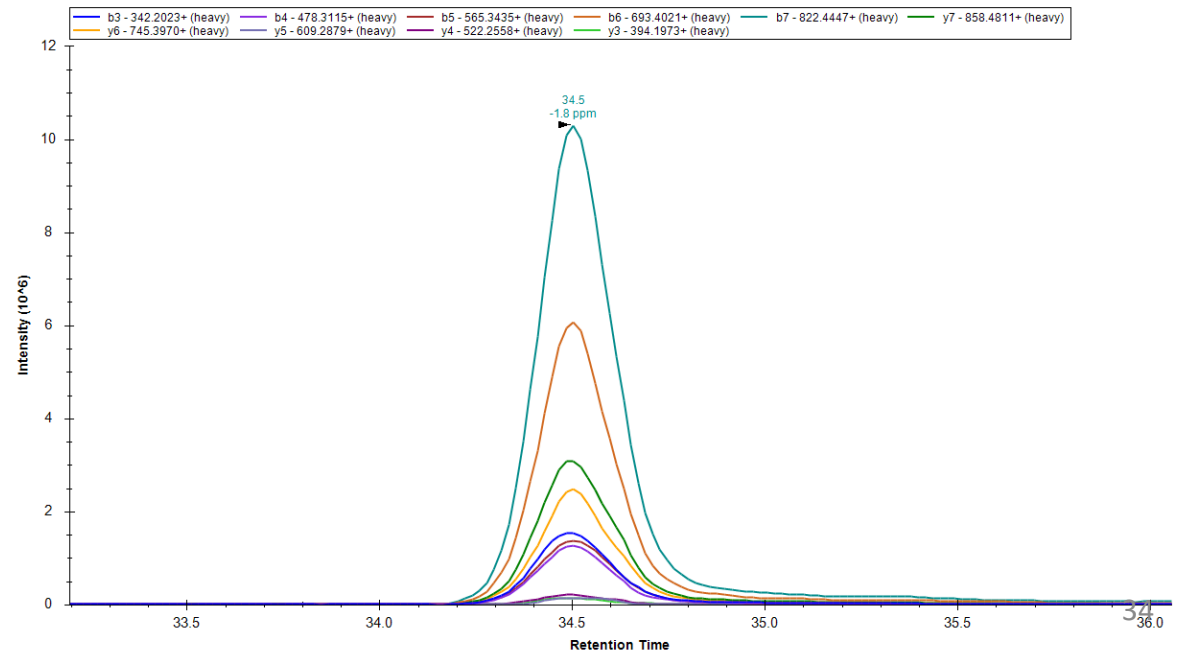

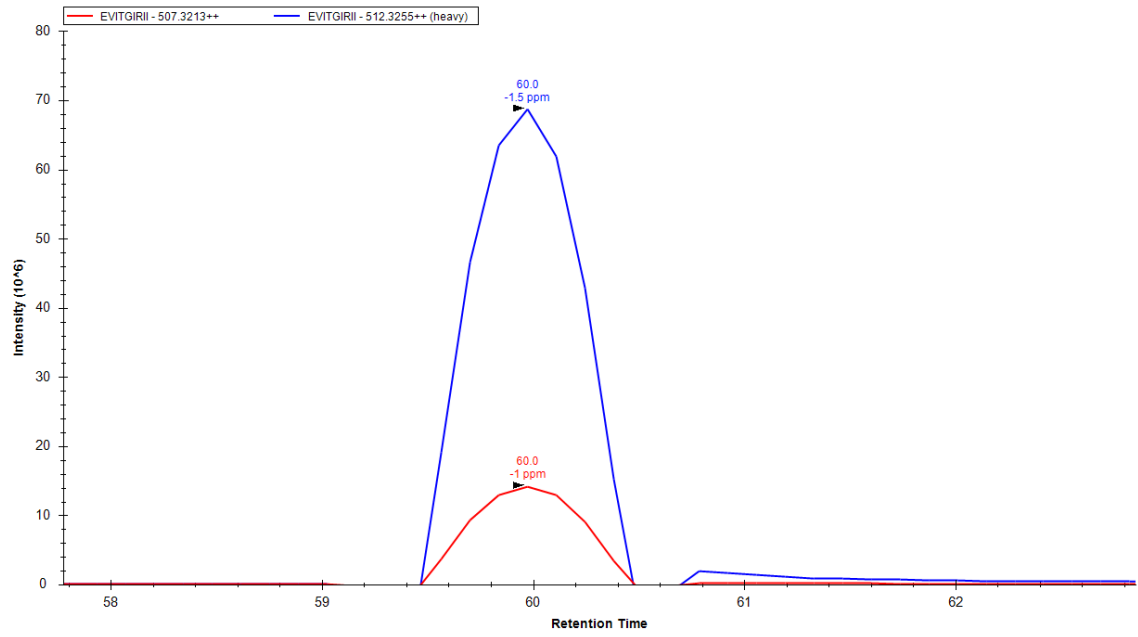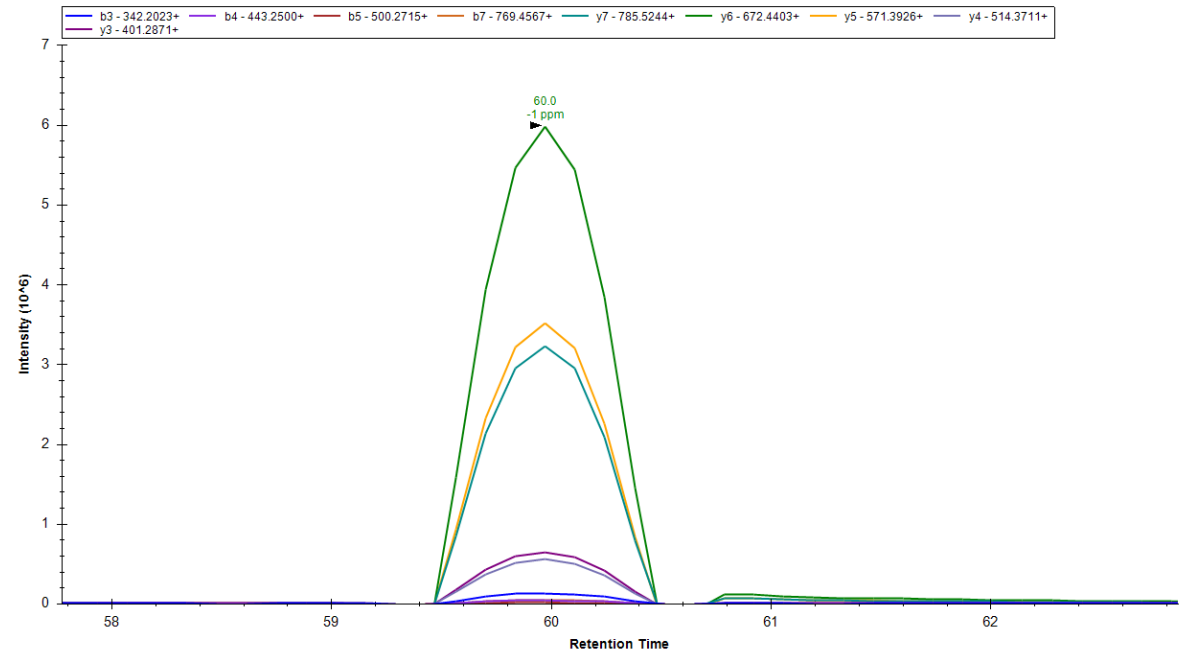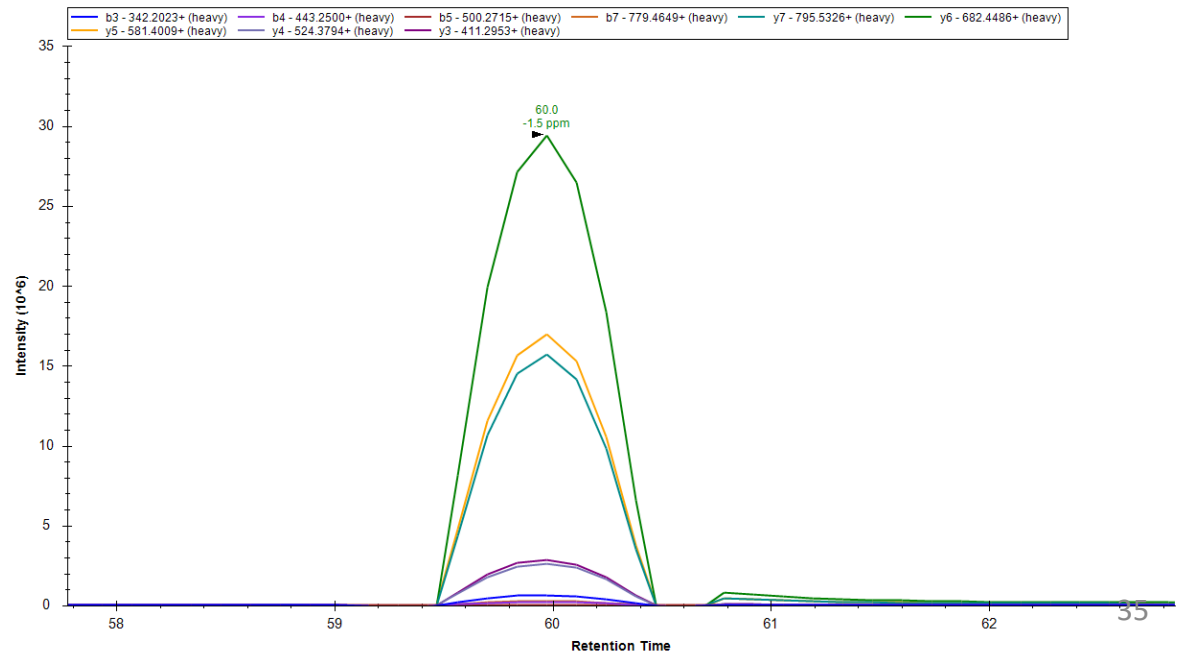

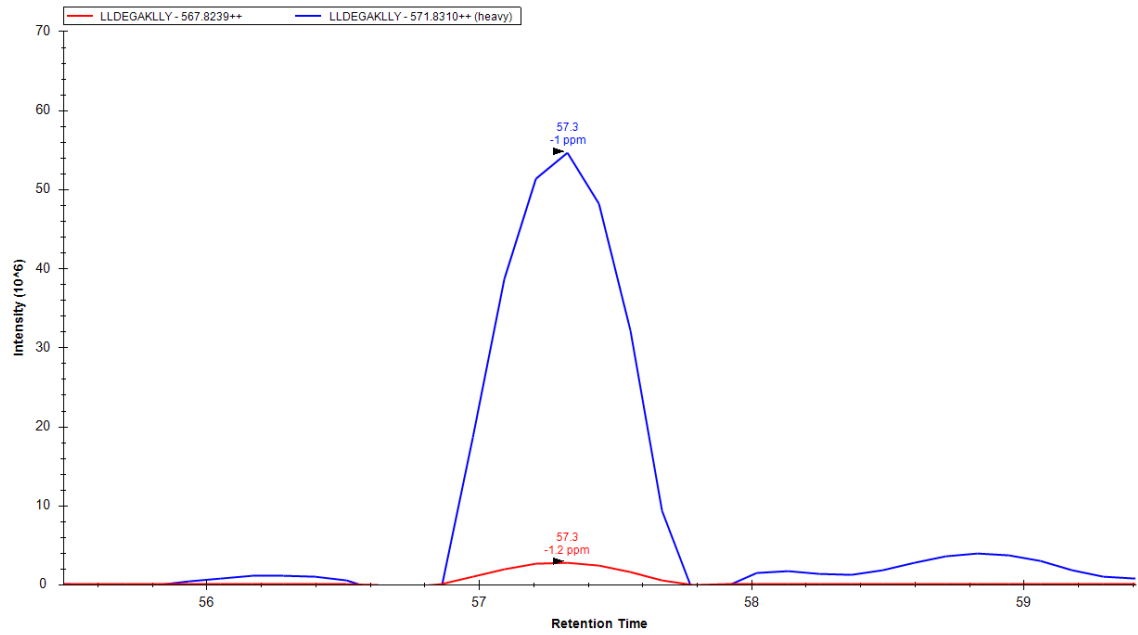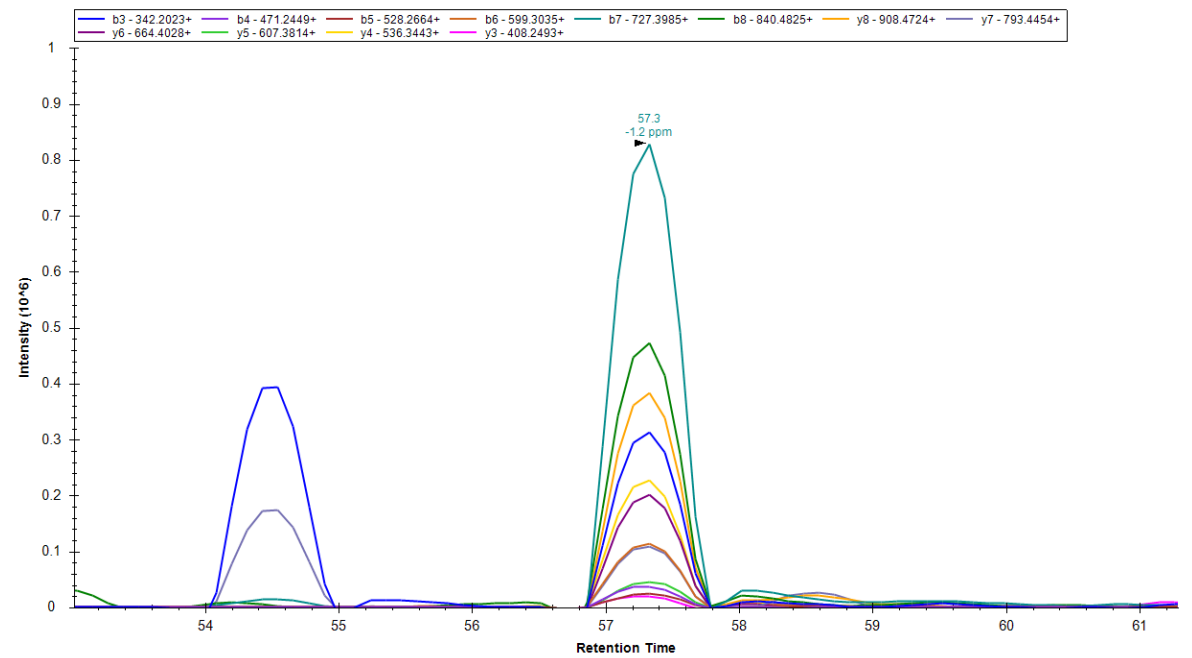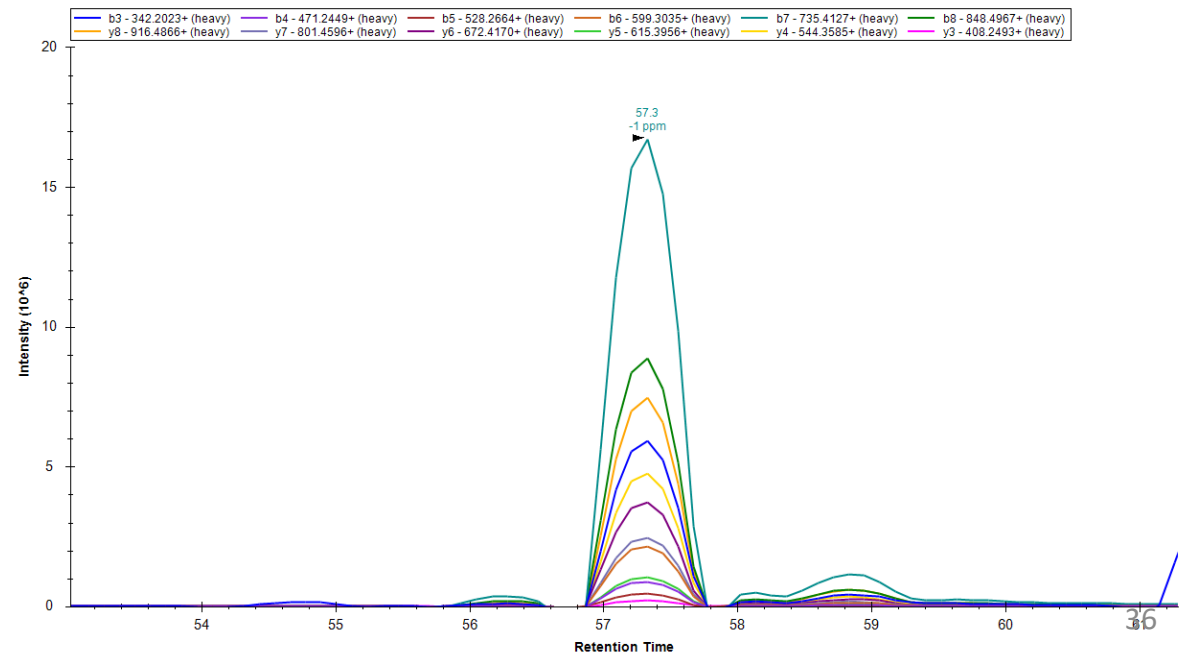

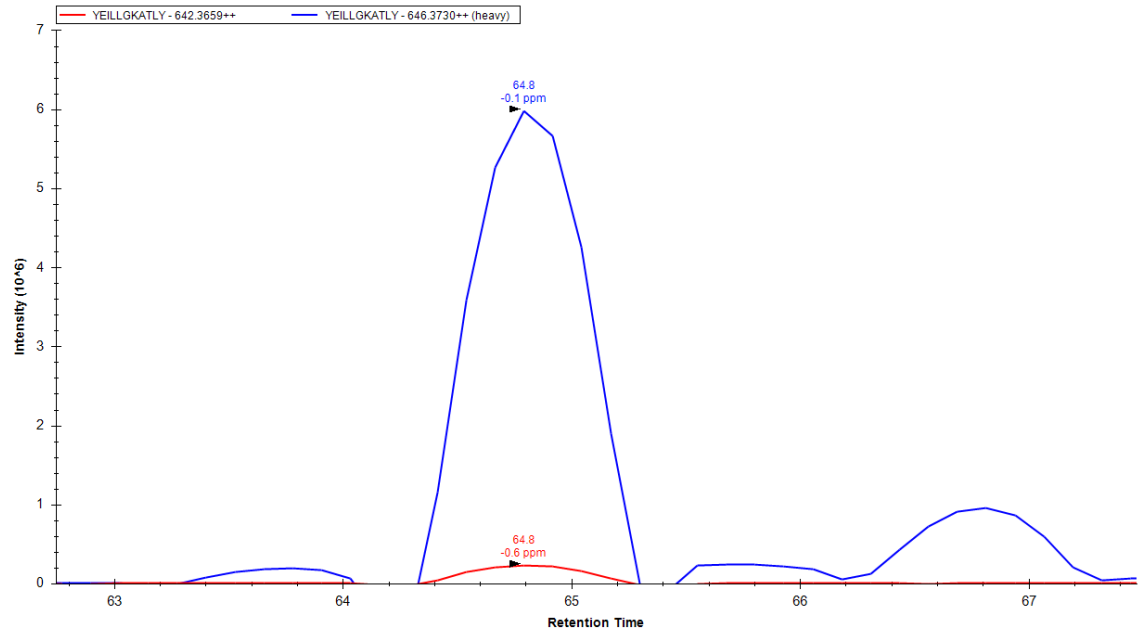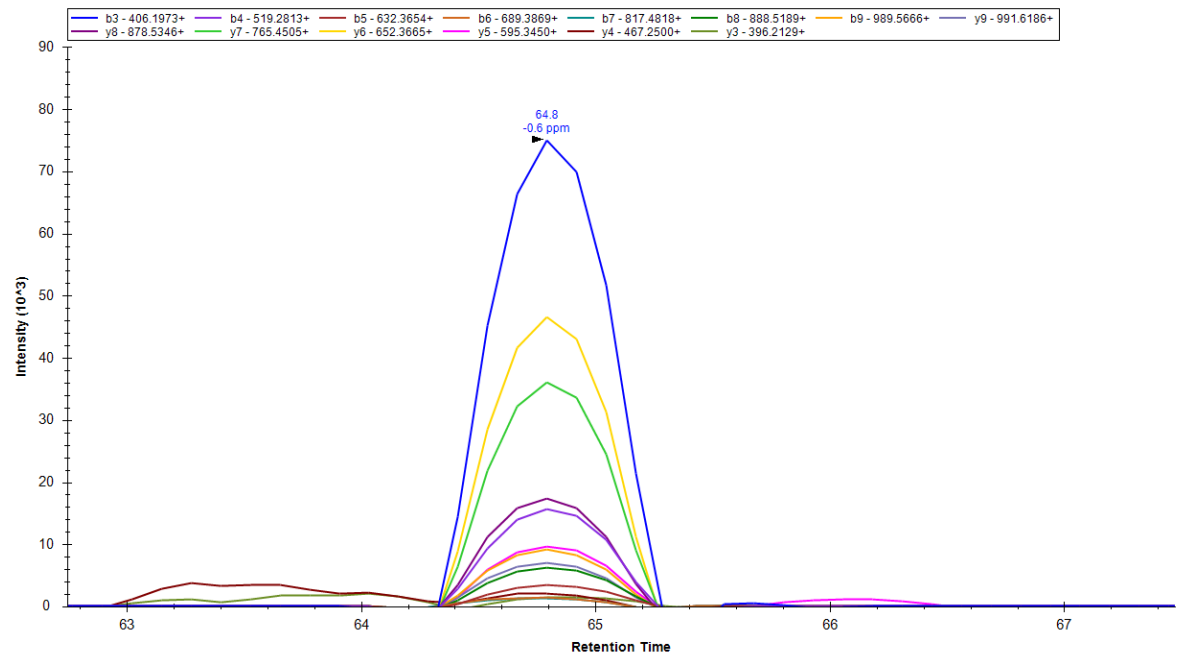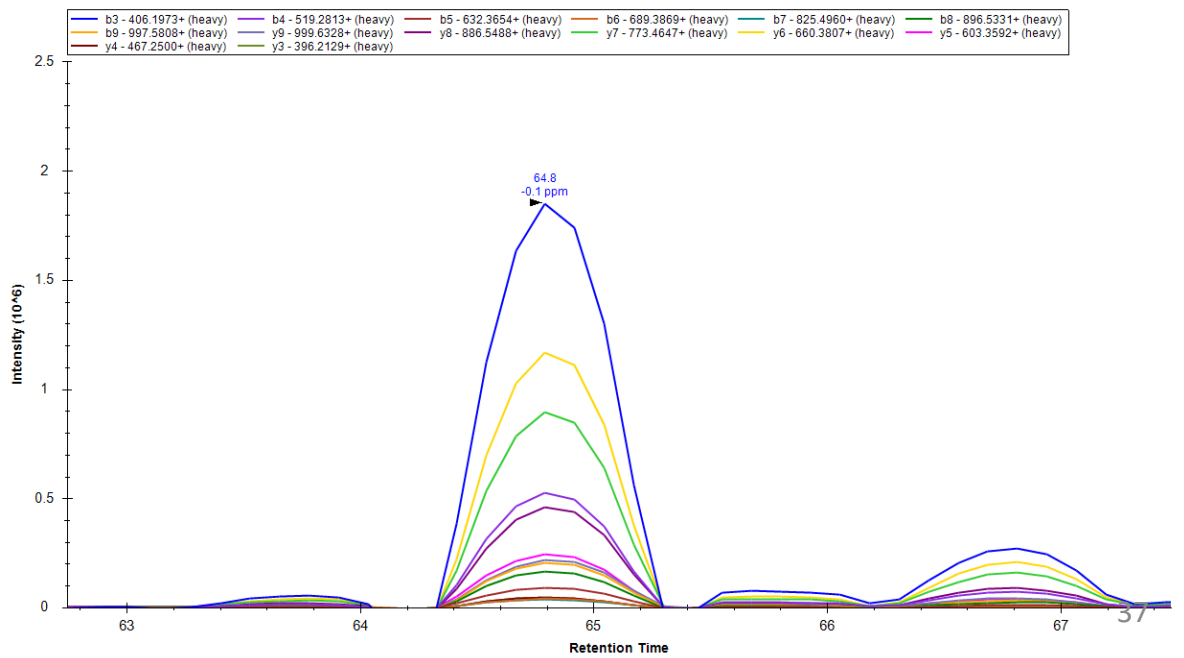

**Fig. S8**

**Pages: 38 - 67**

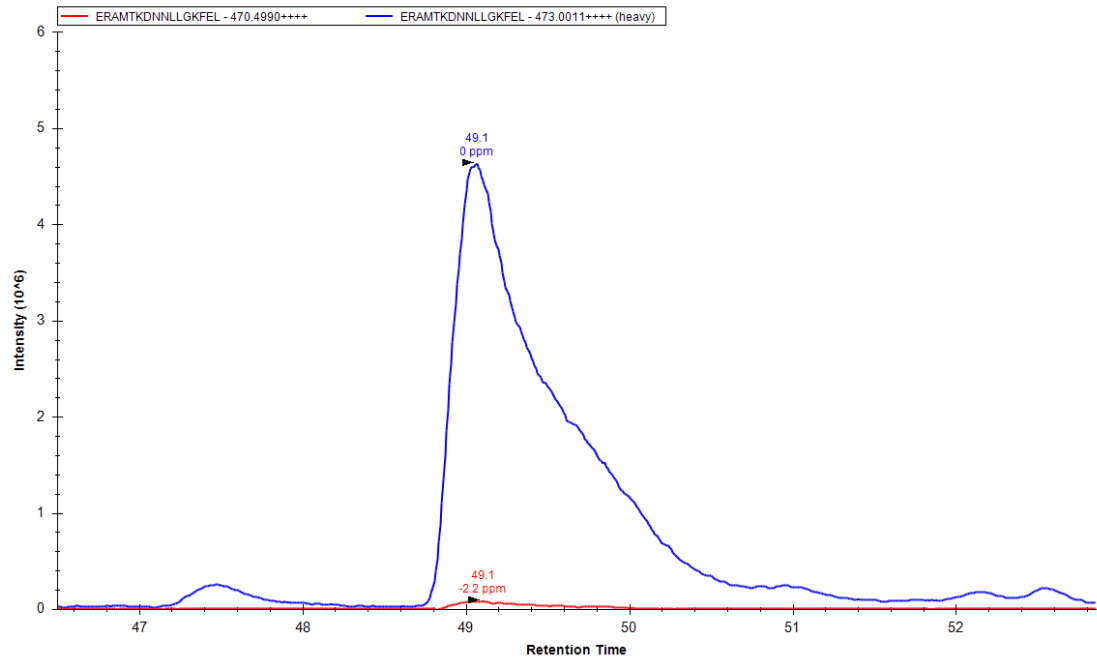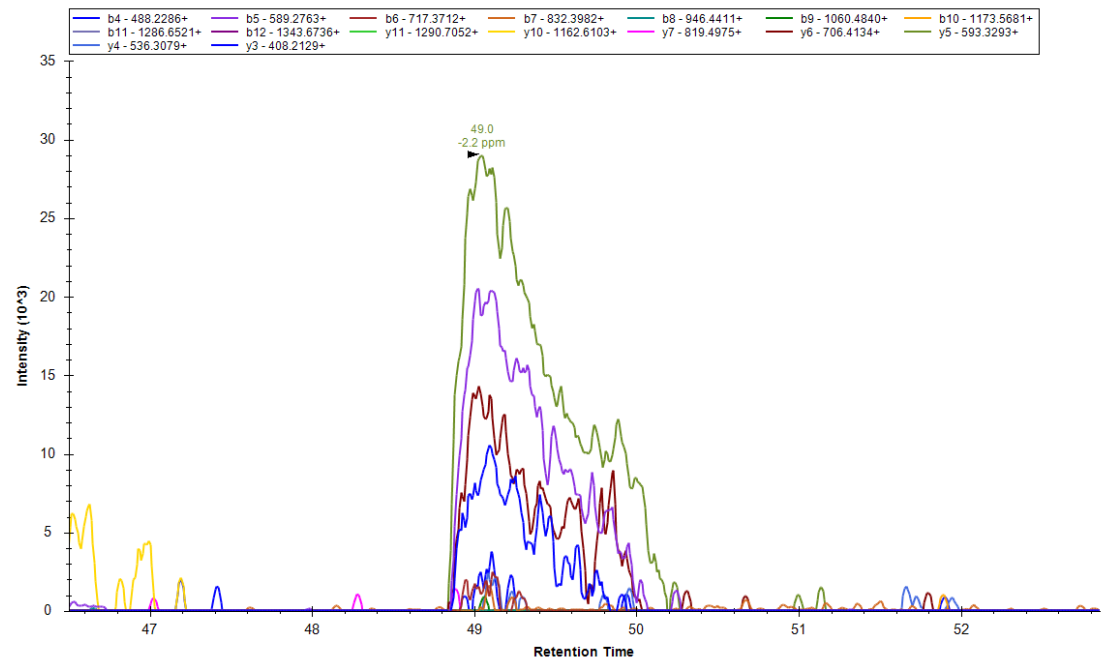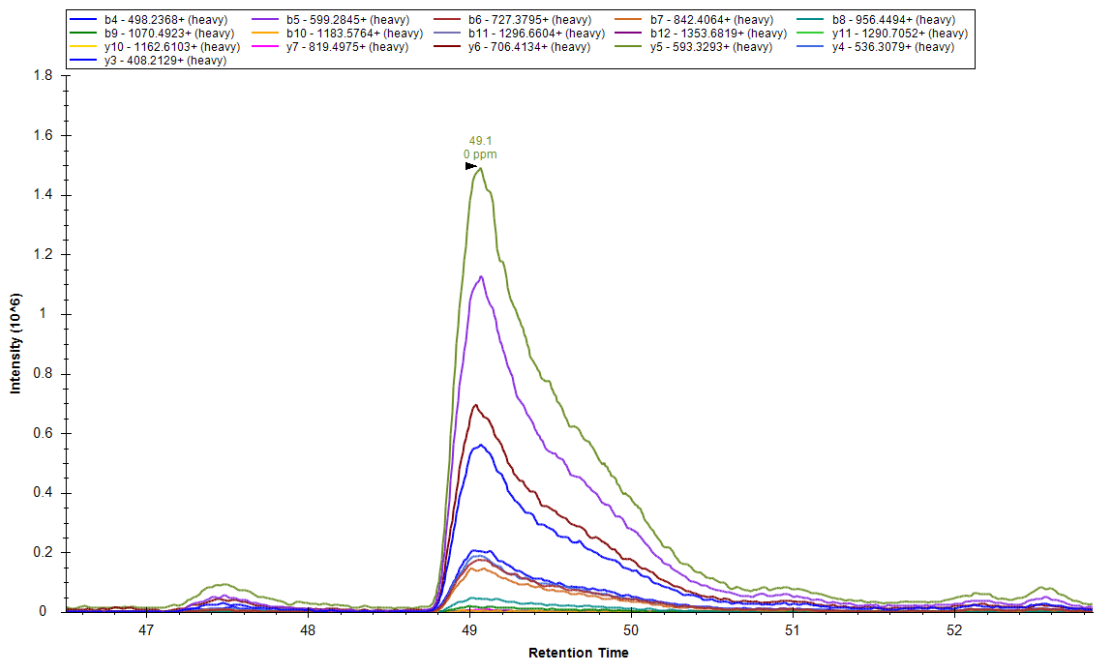

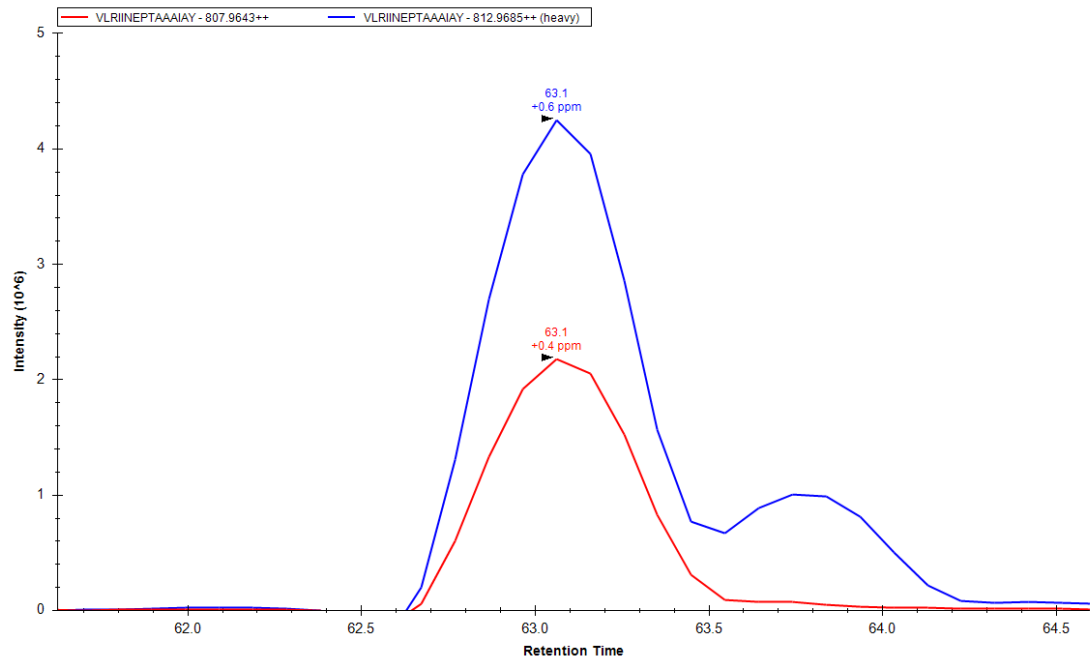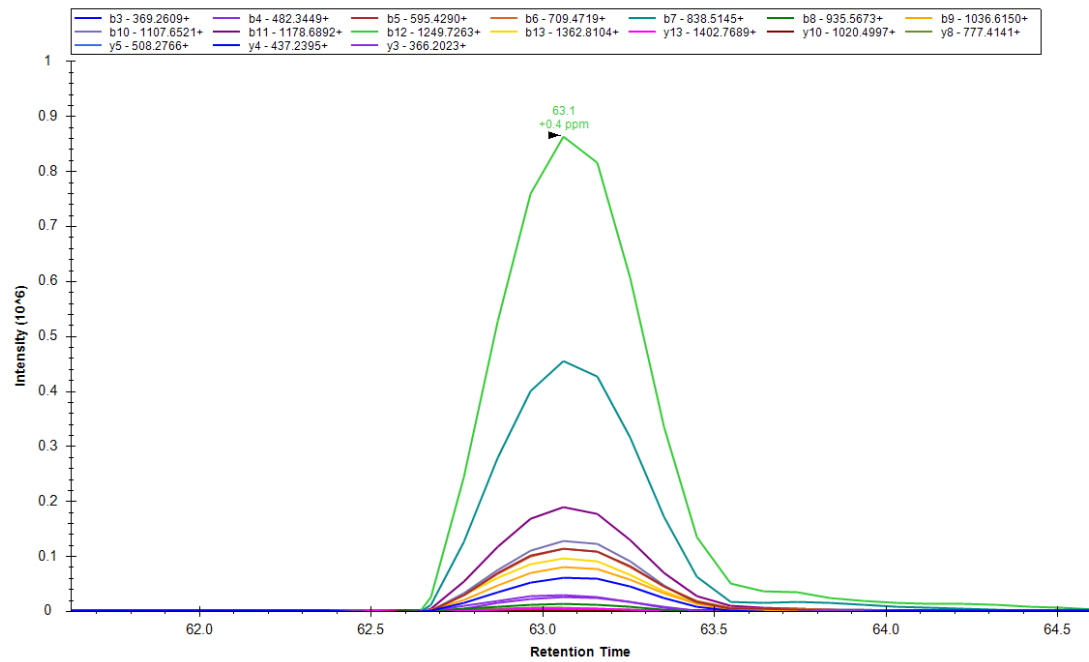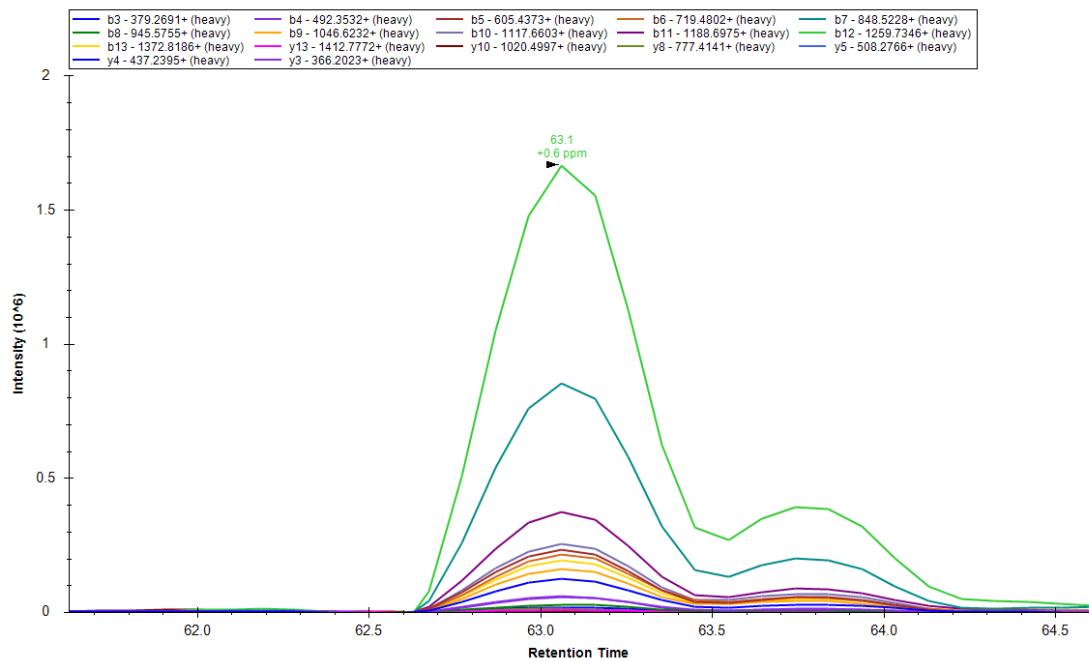



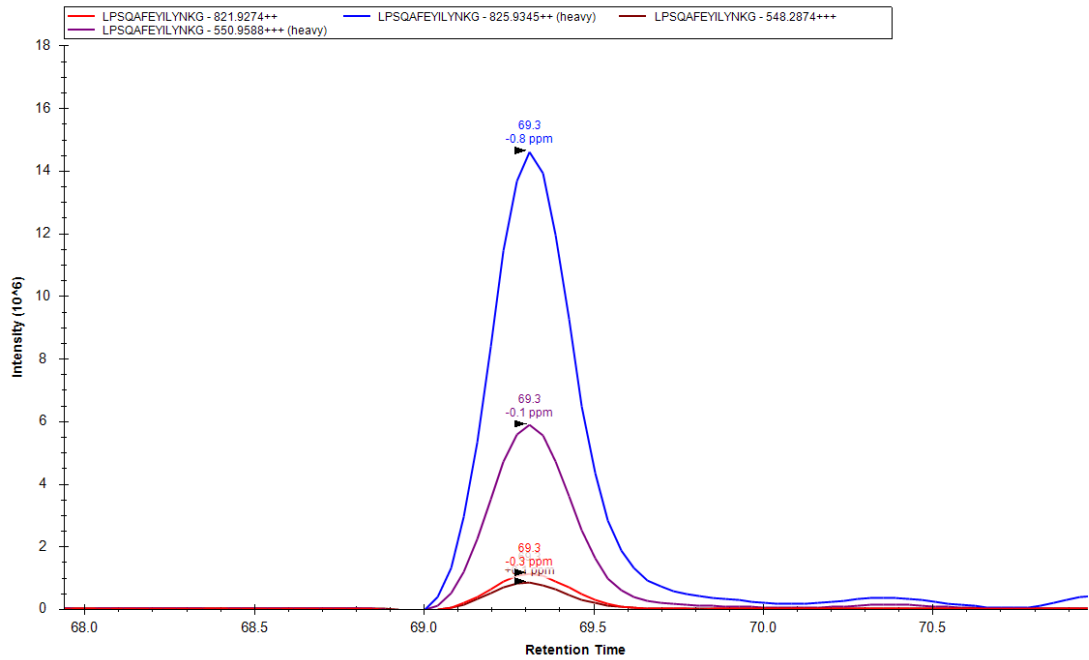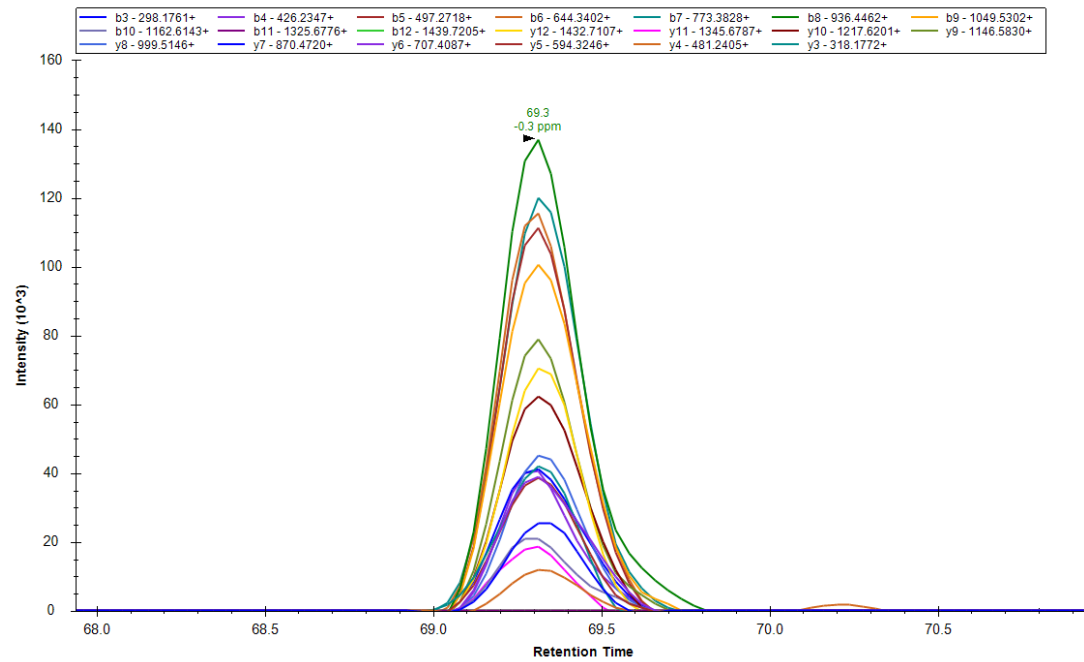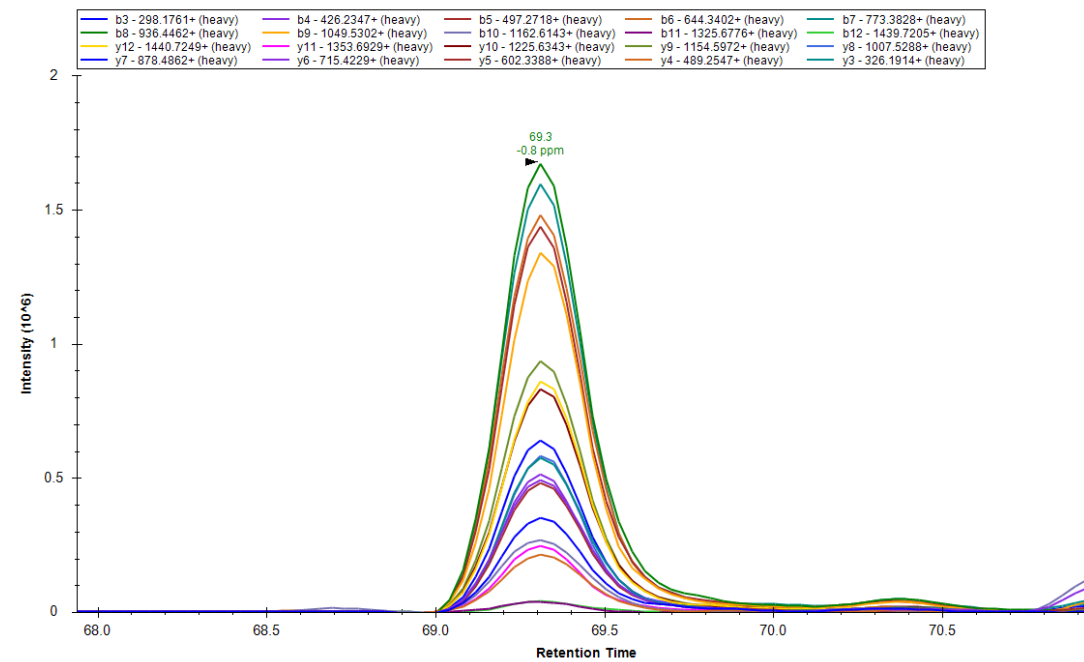

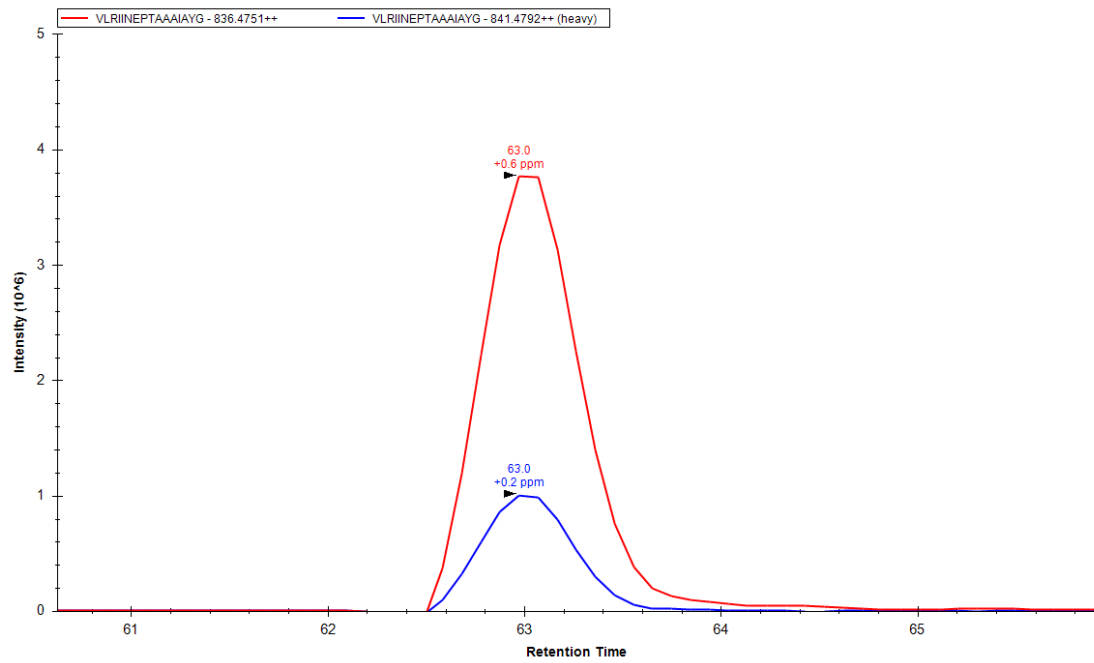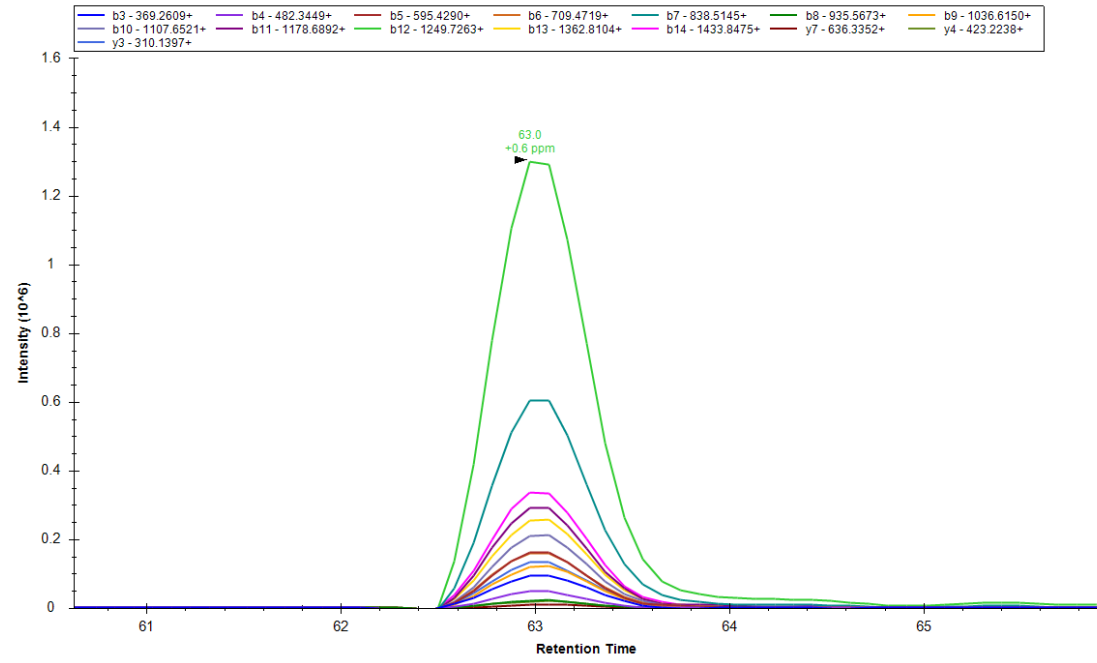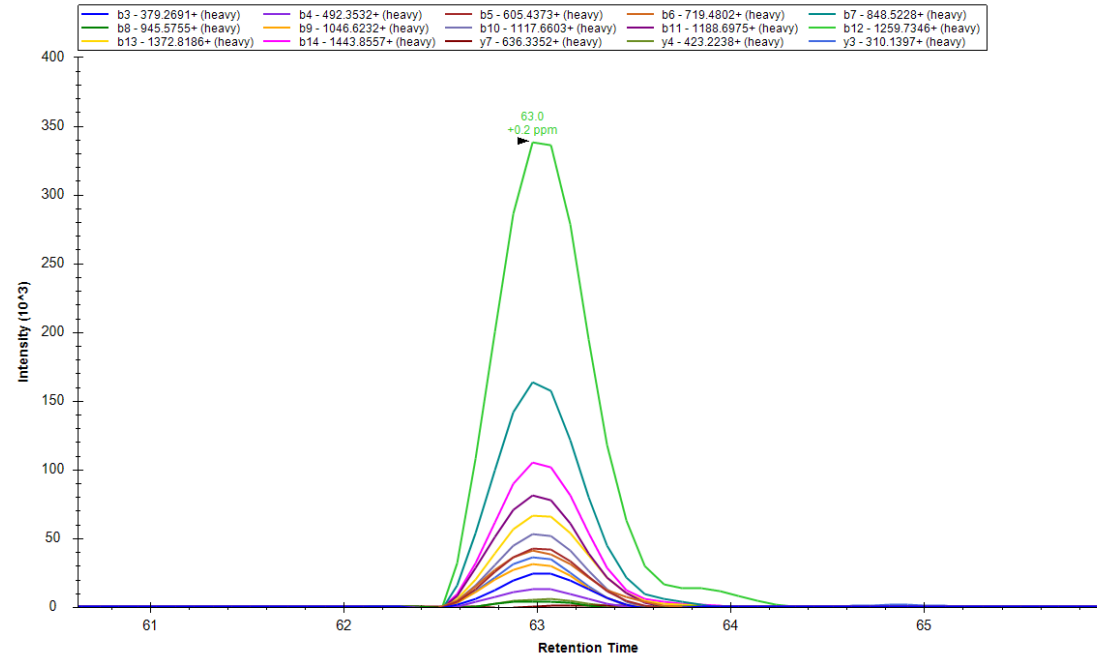

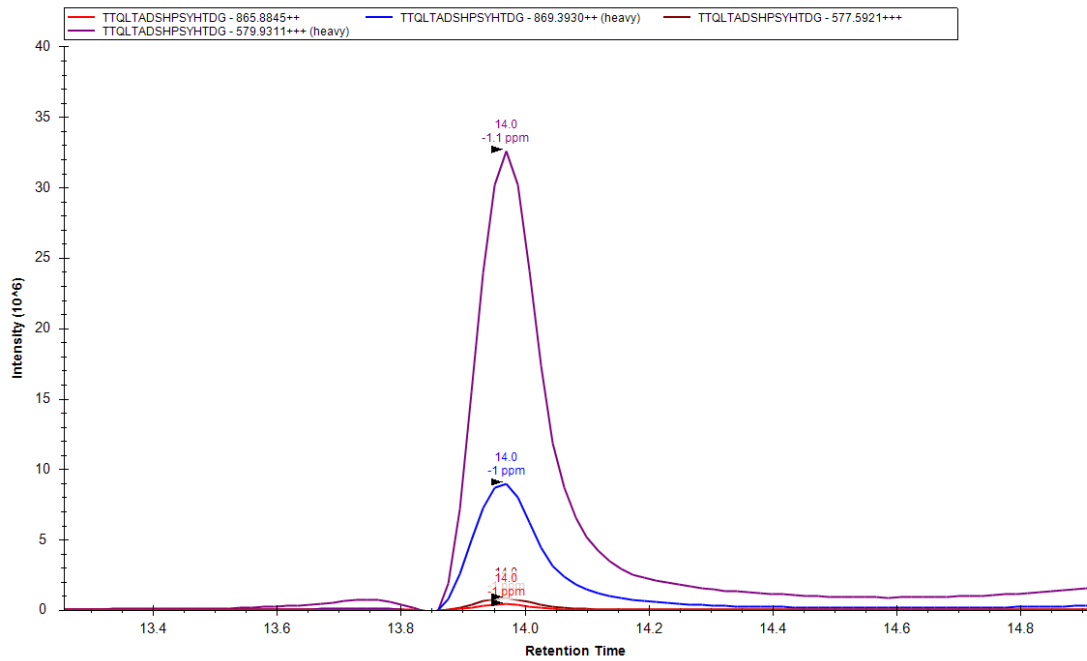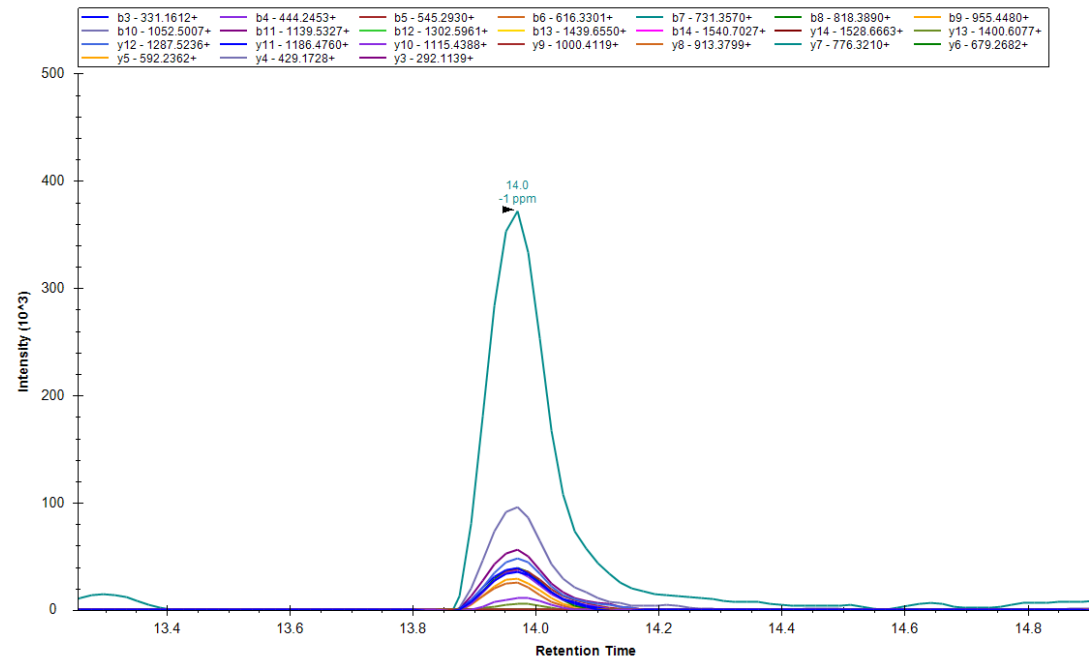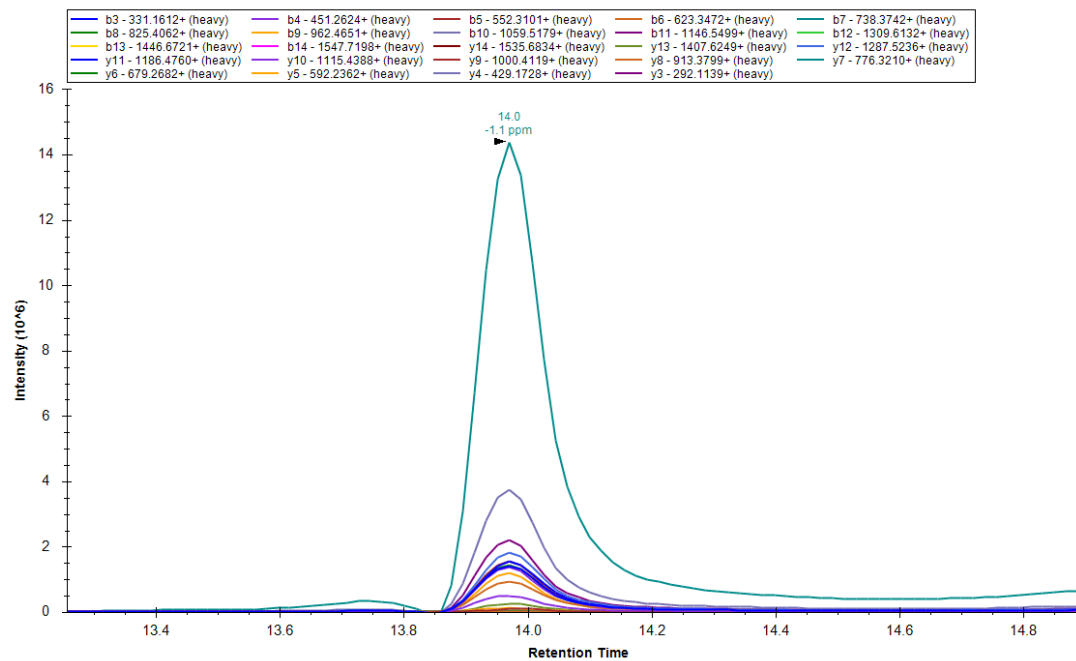

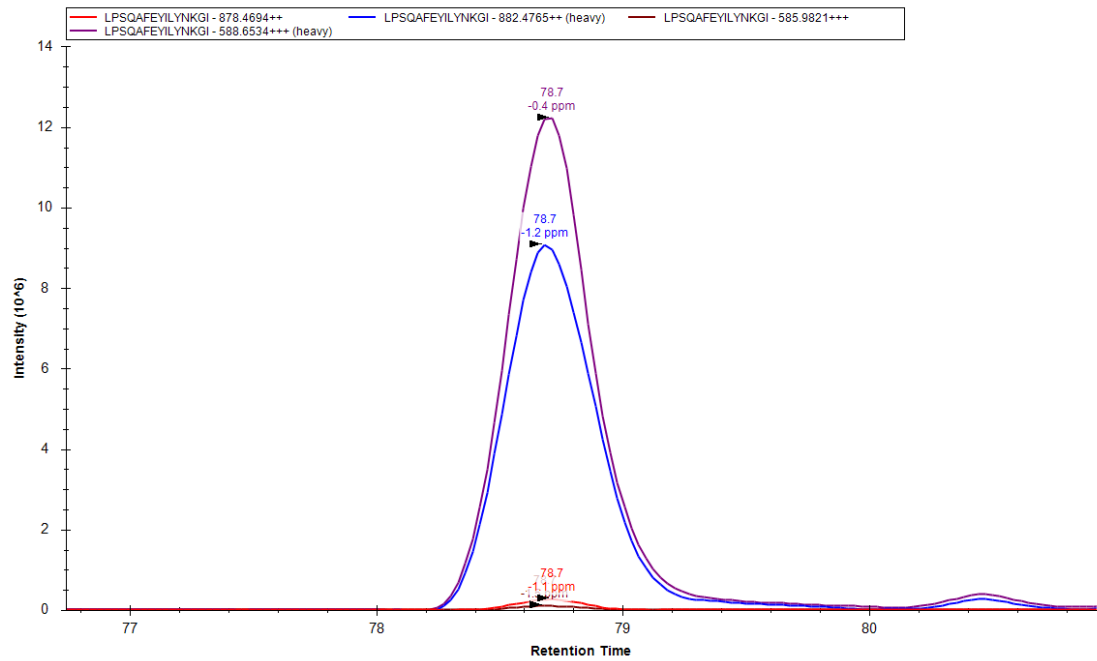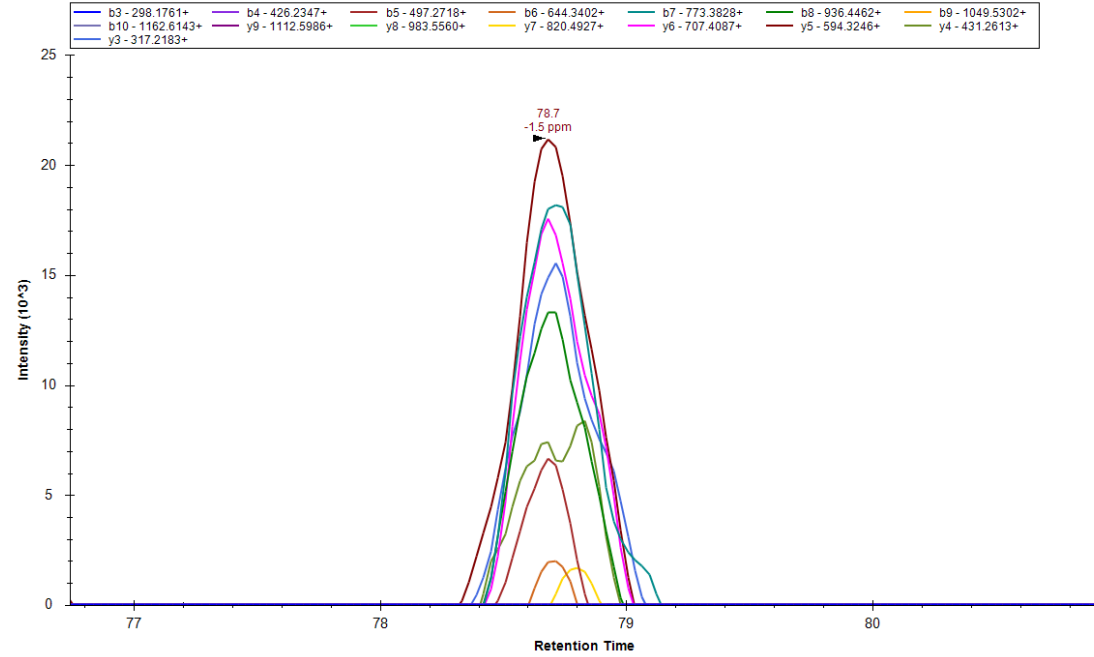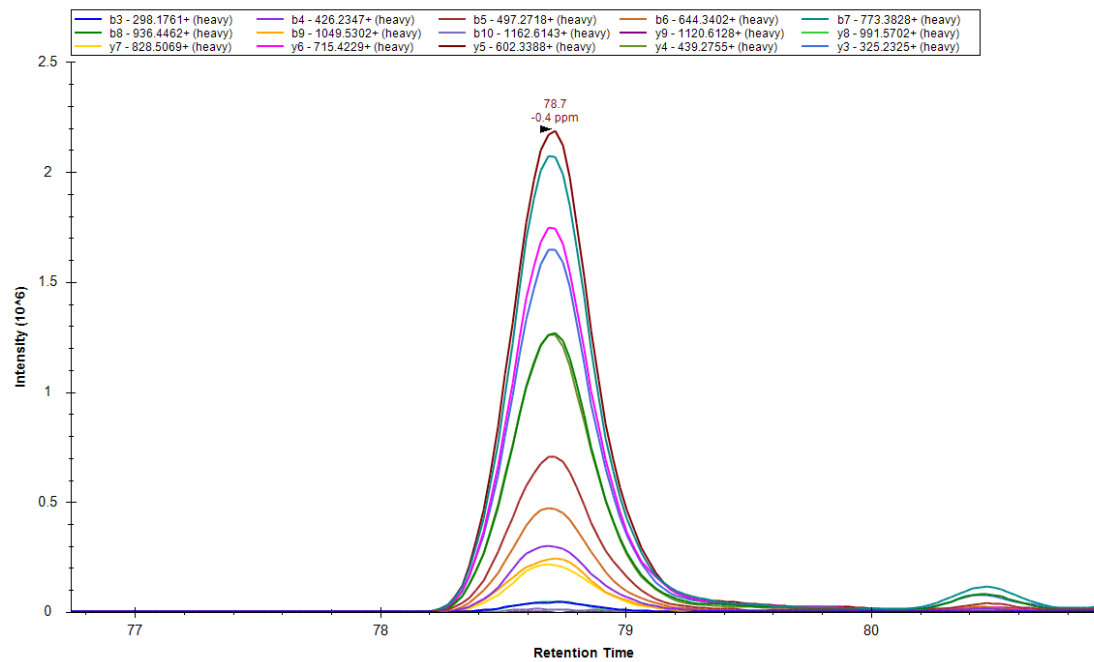

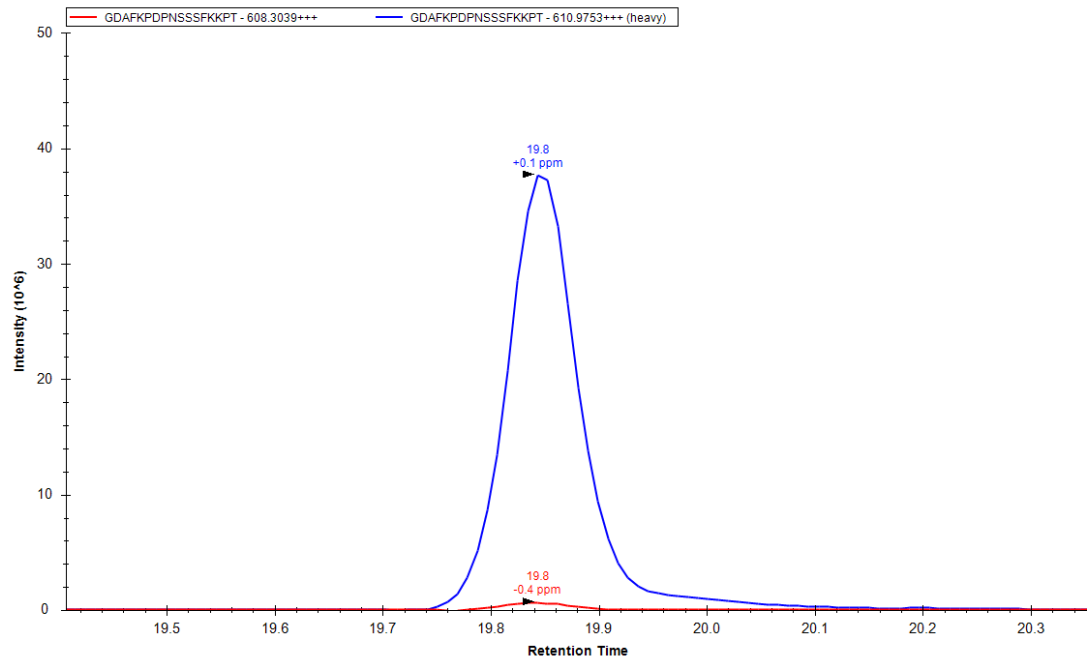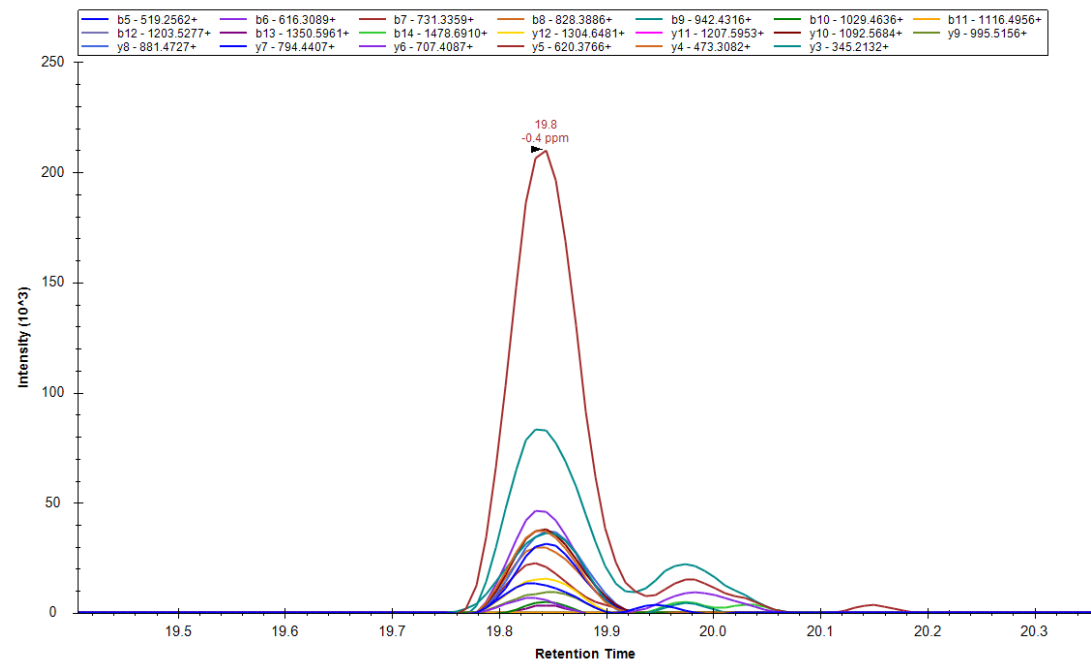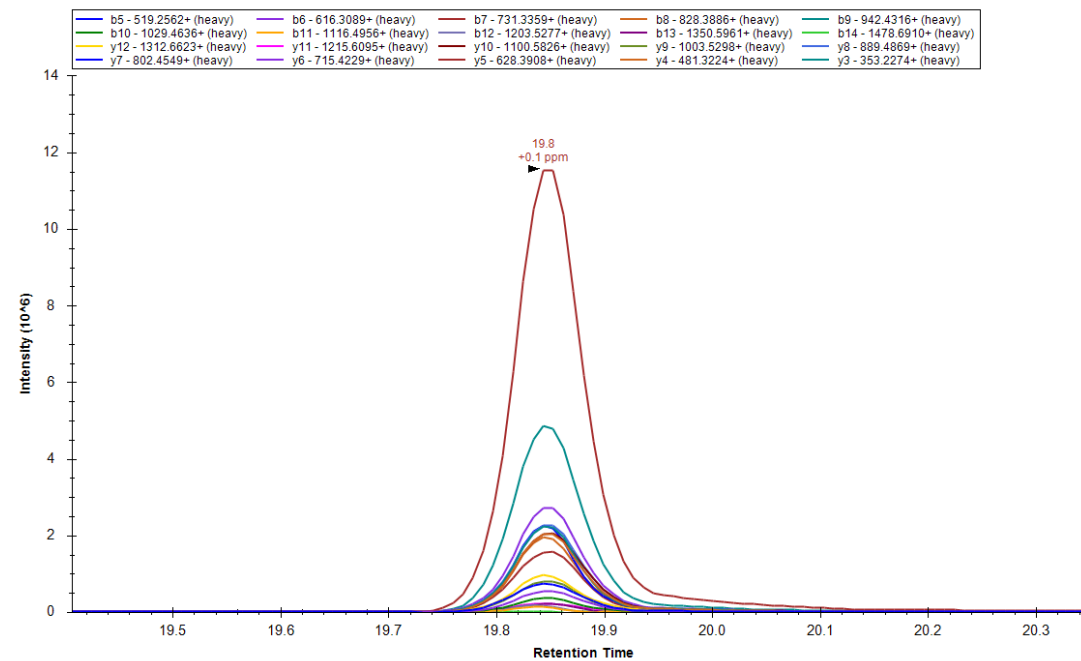

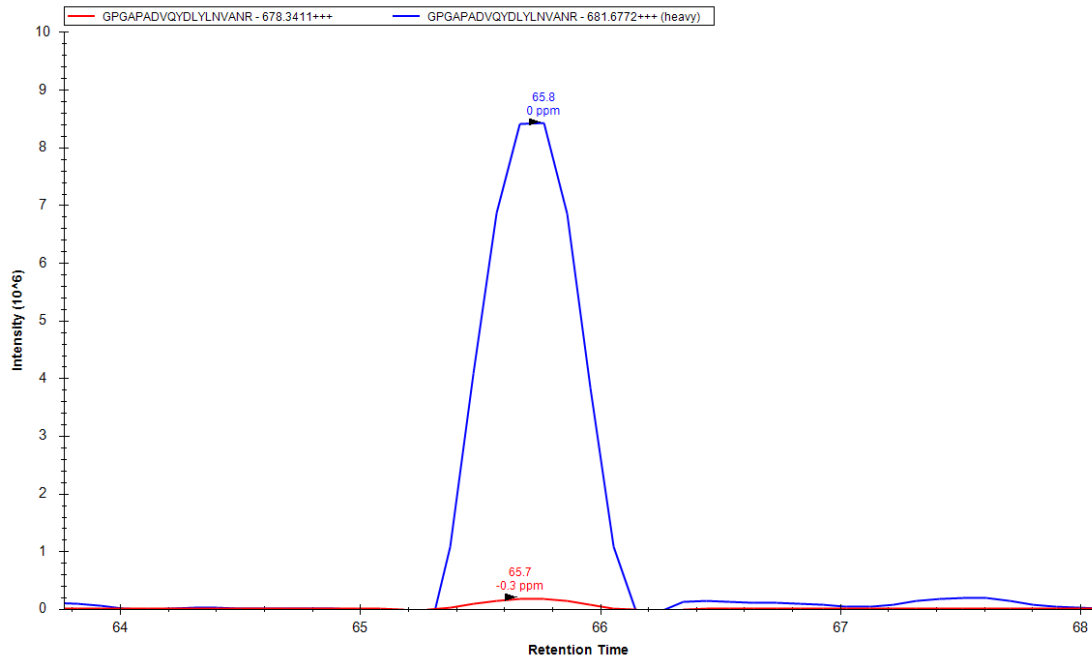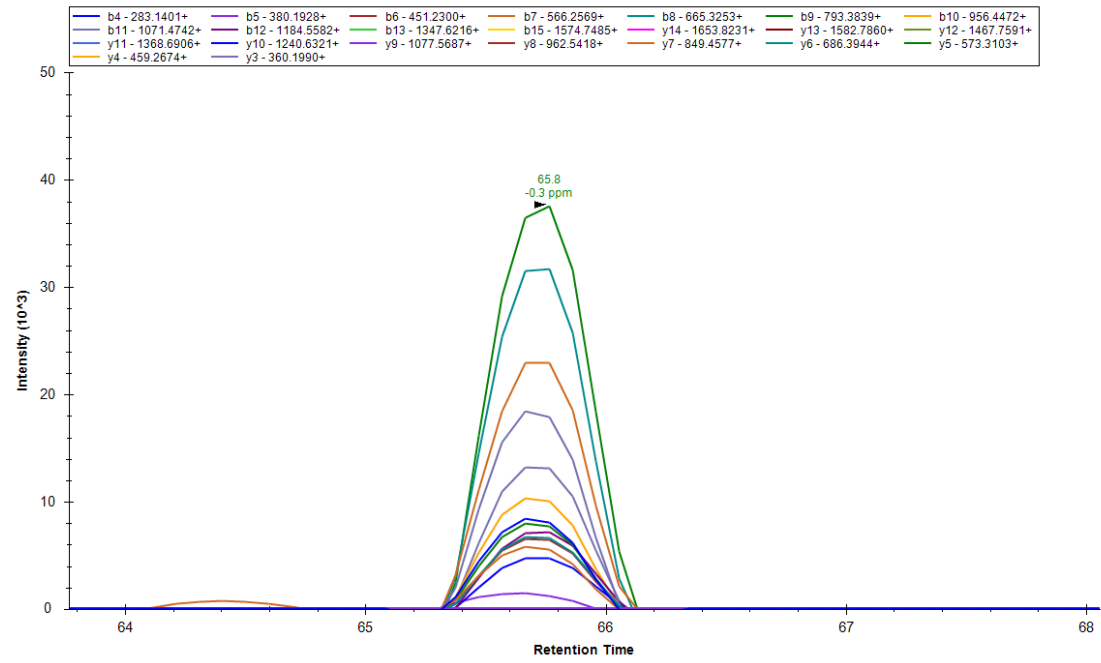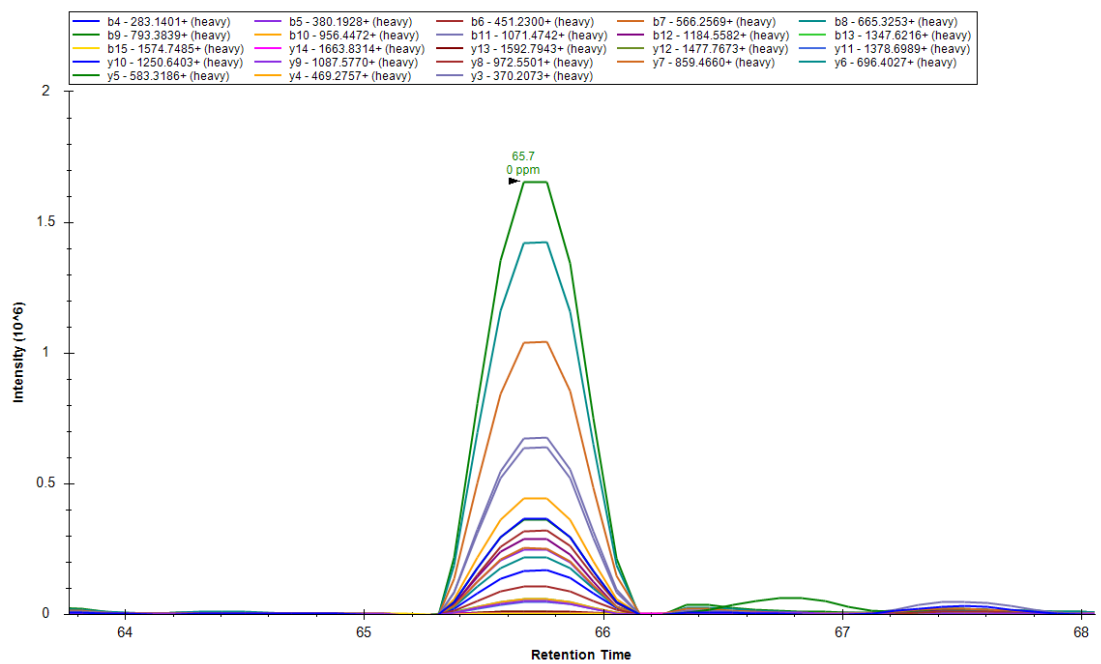

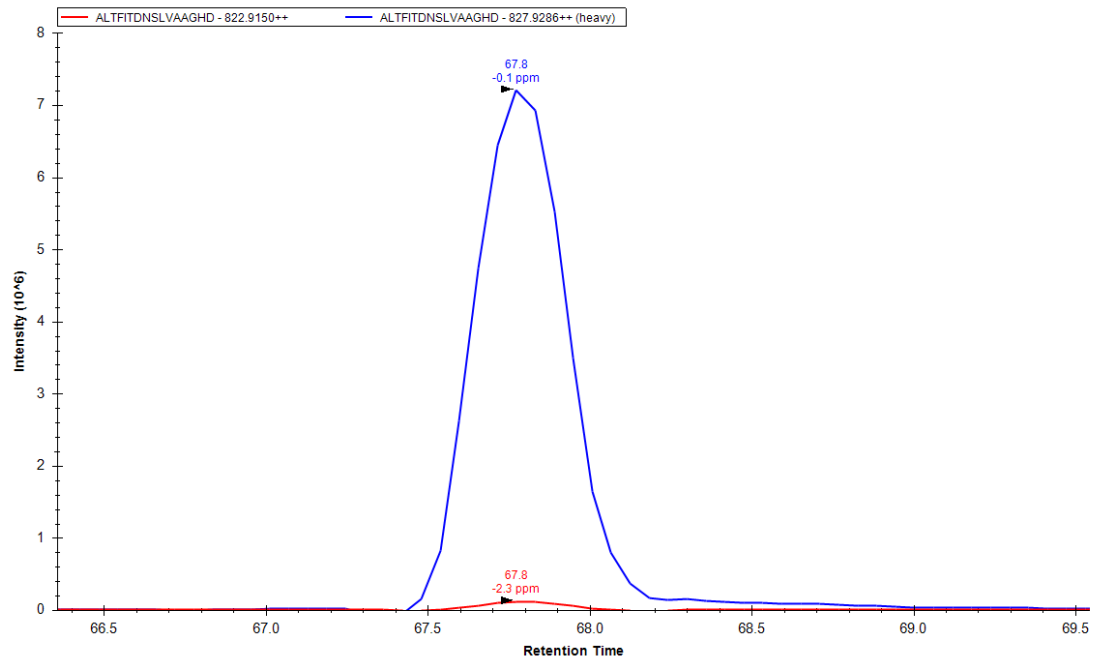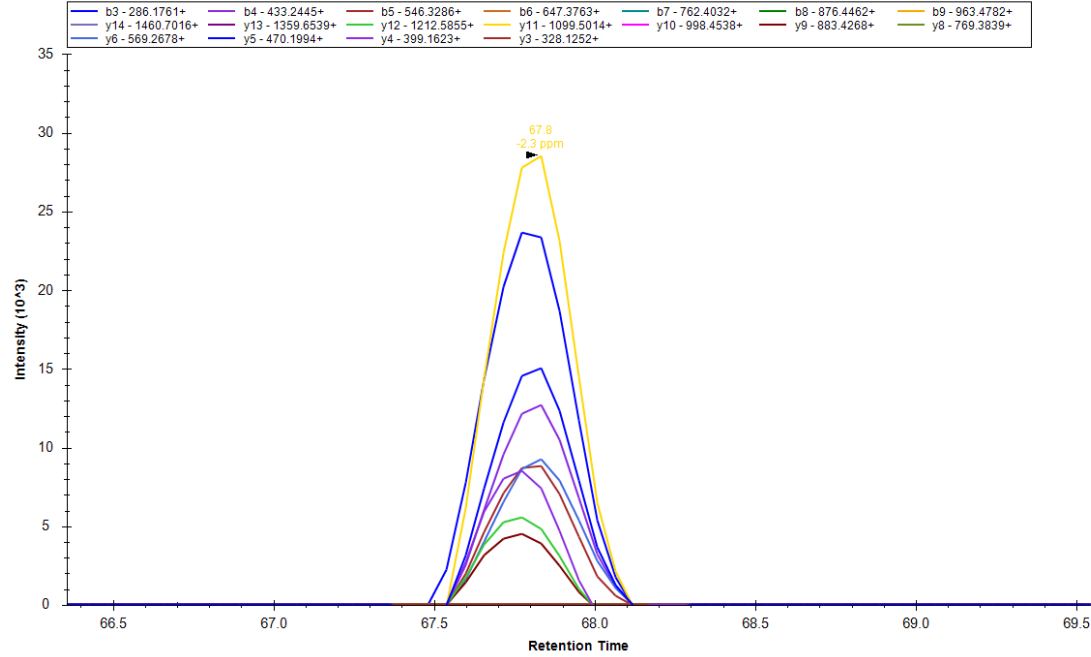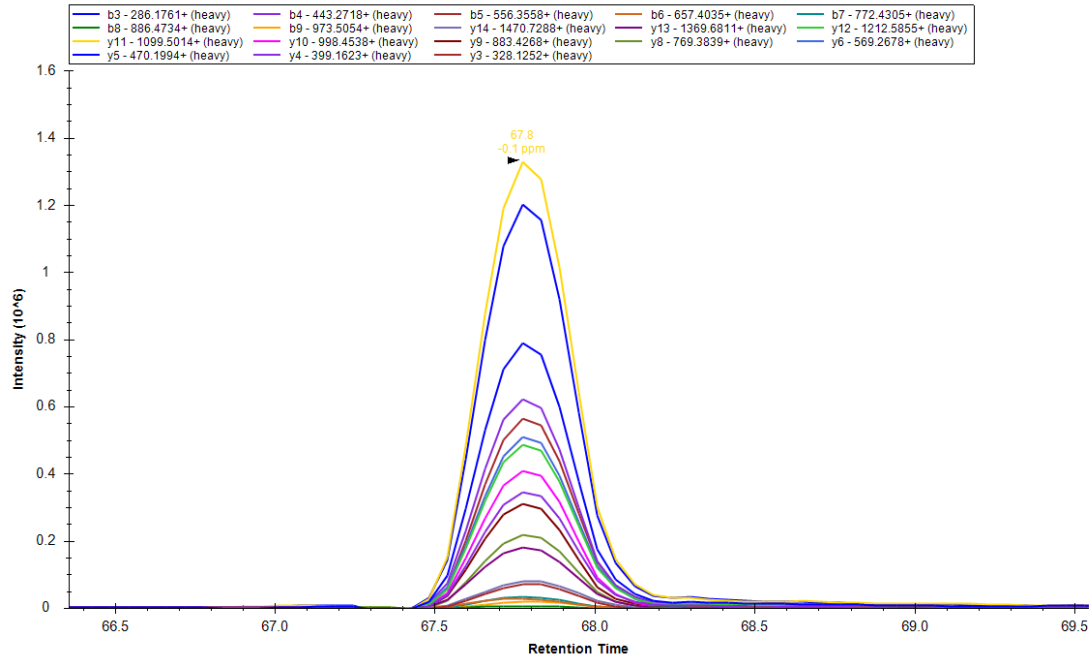

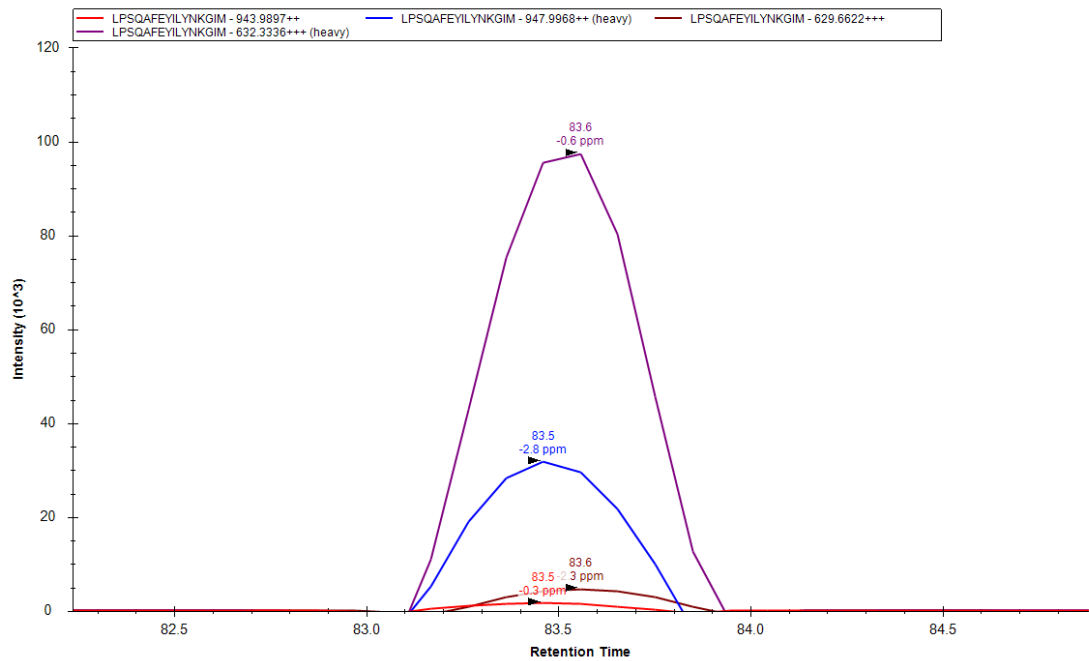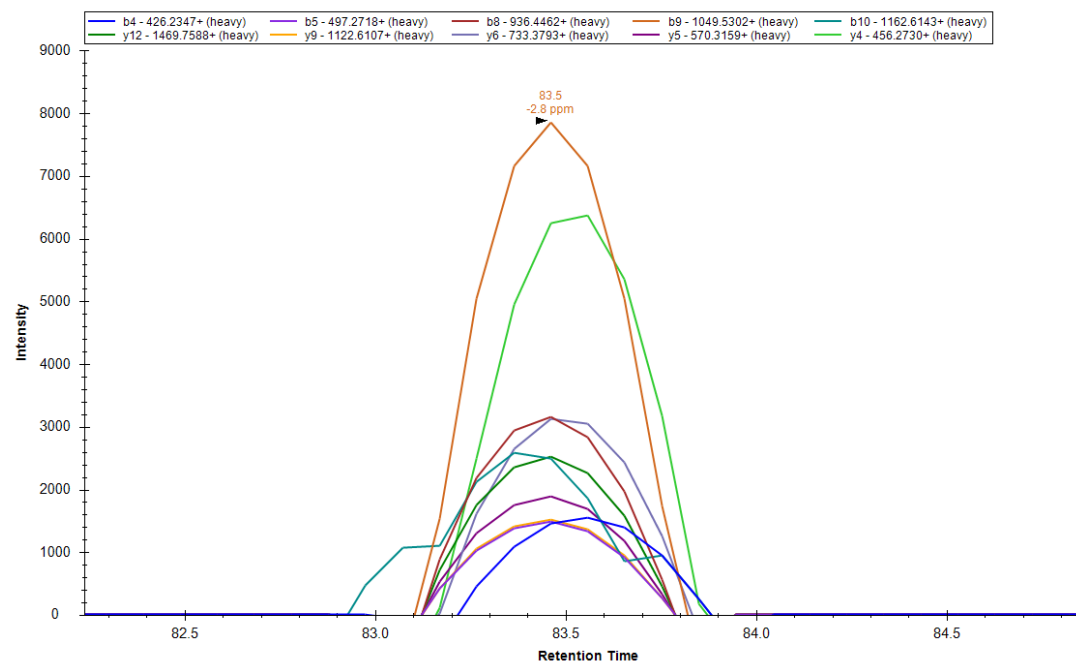



# LPSQAFEYILYNKGIM

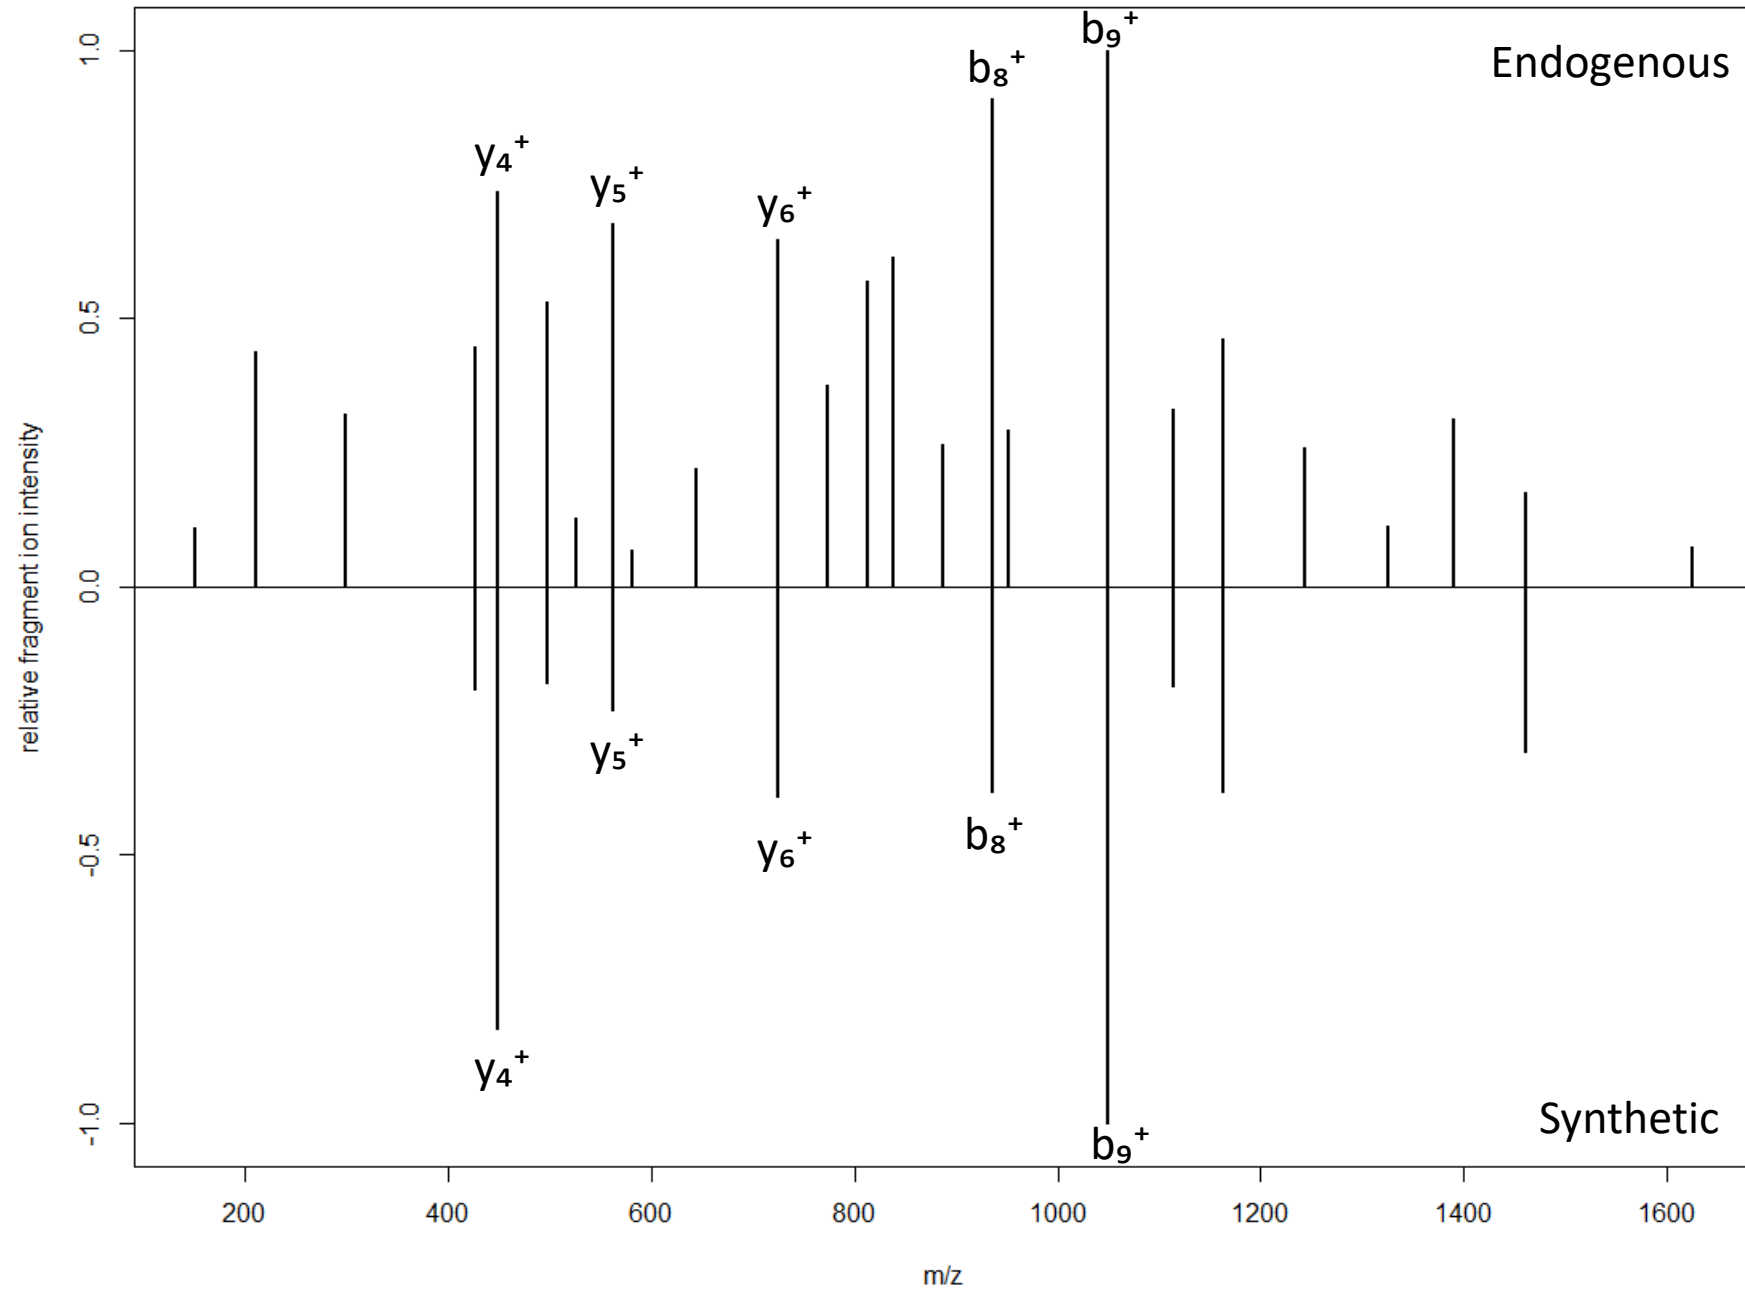

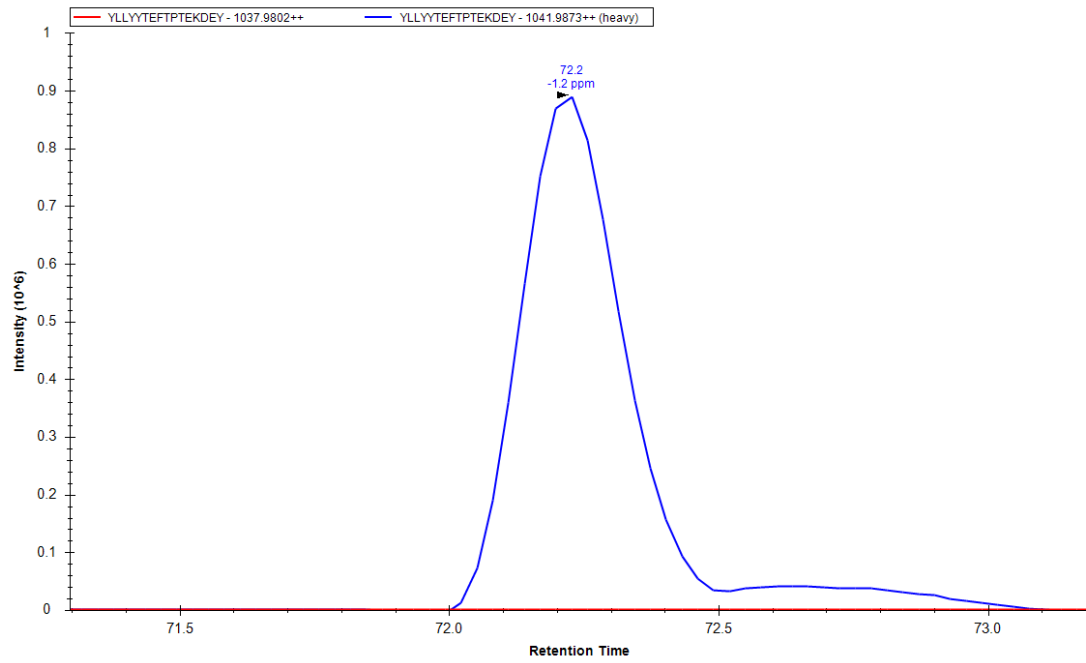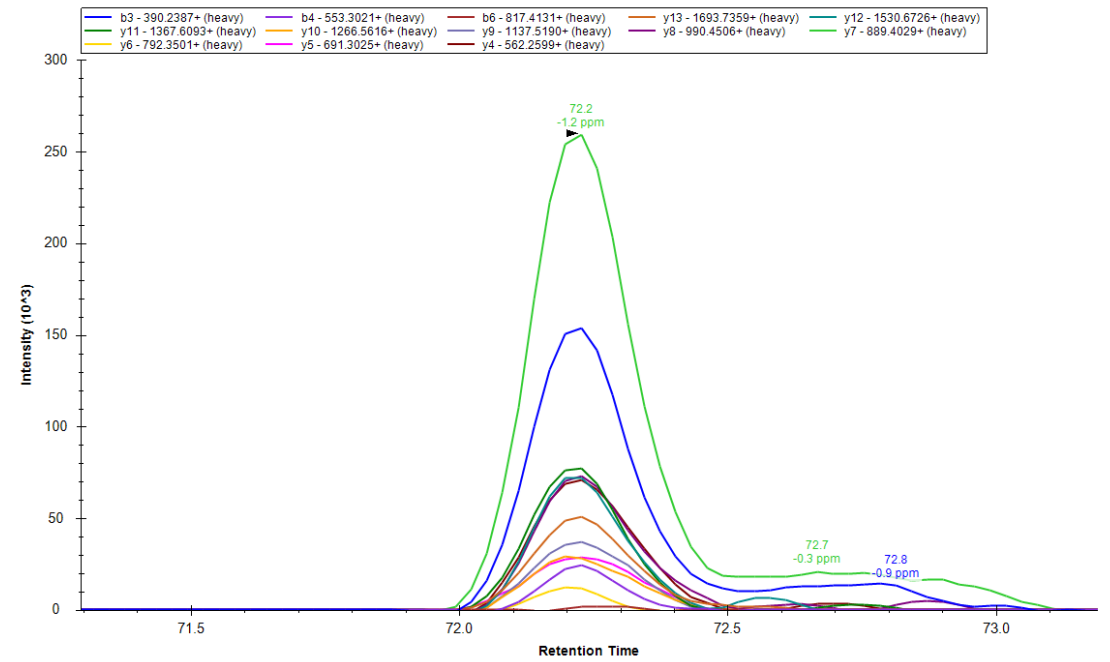

YLLYYTEFTPTEKDEY

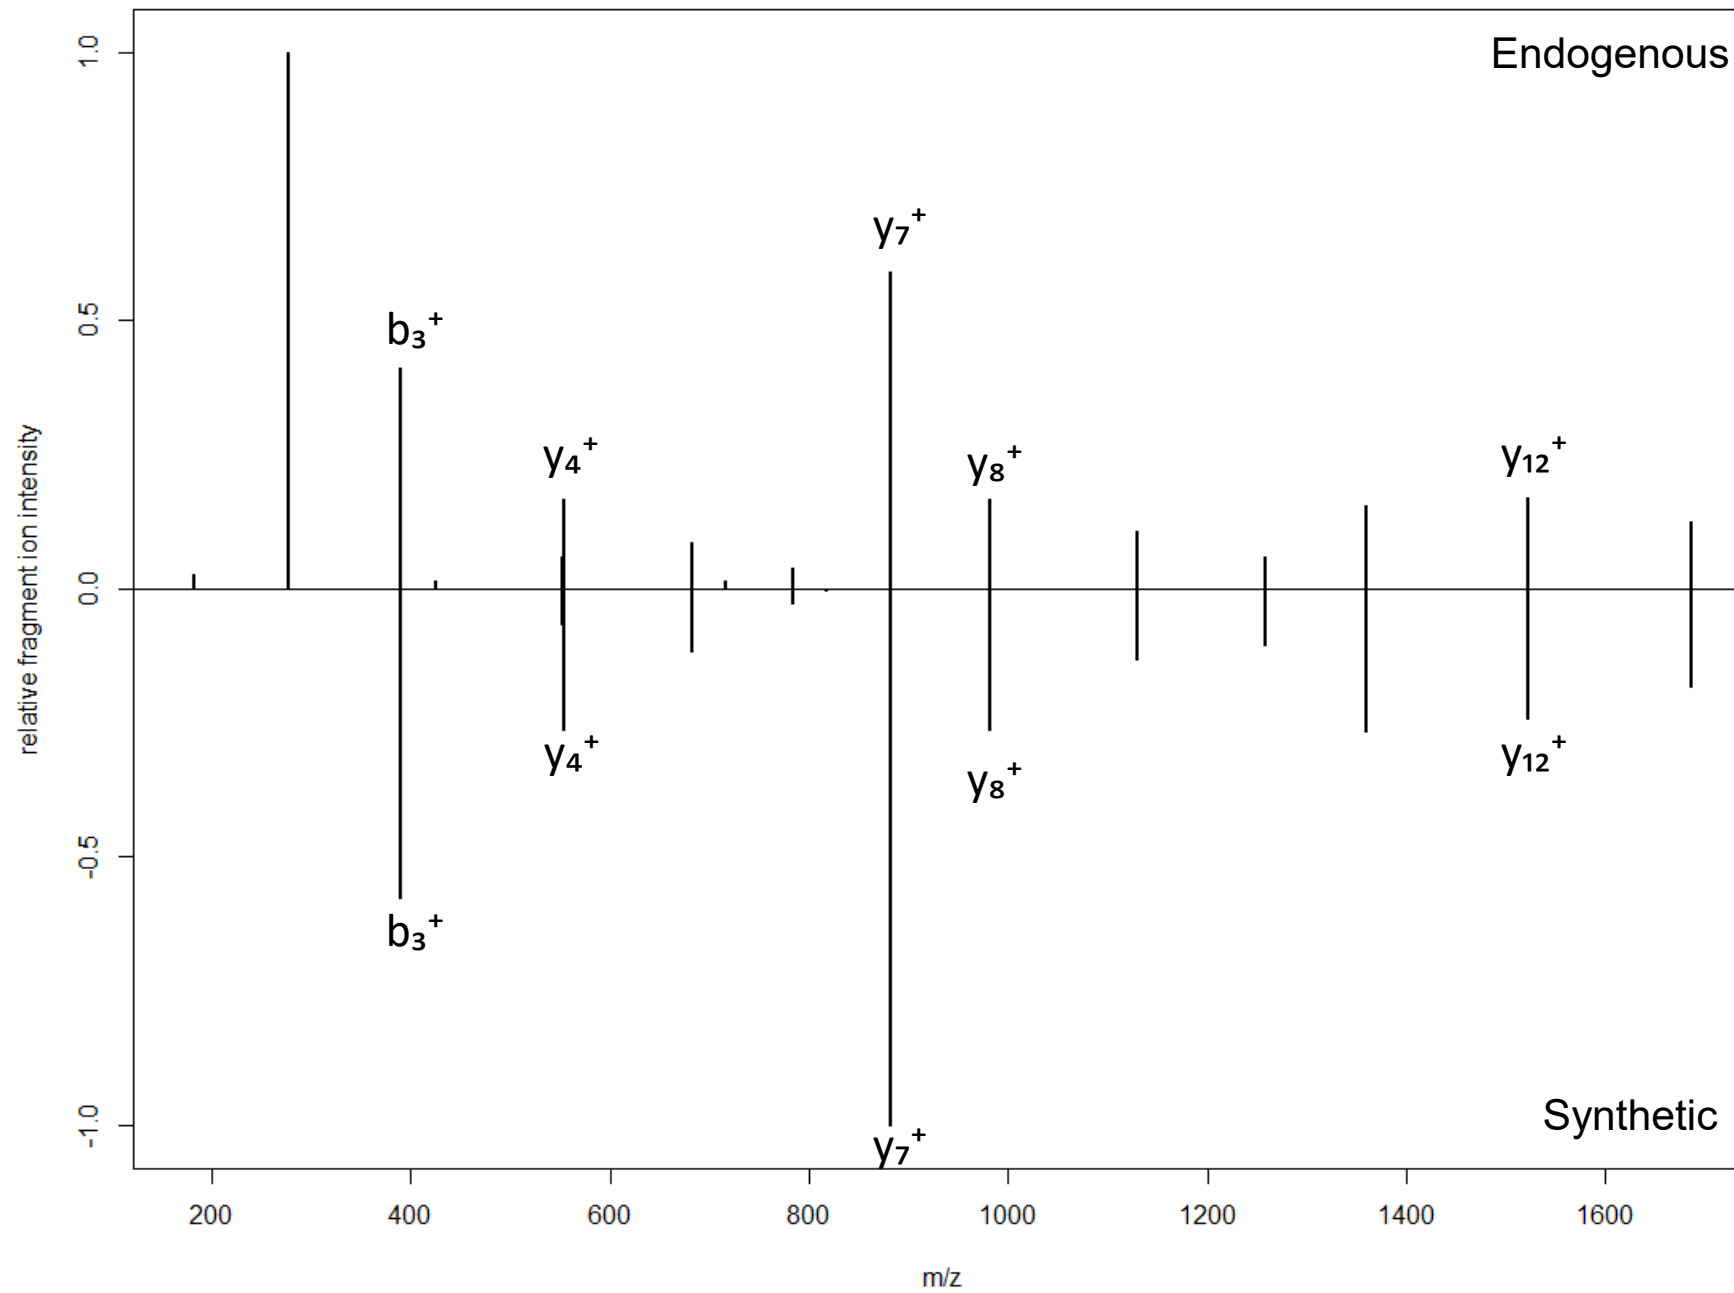

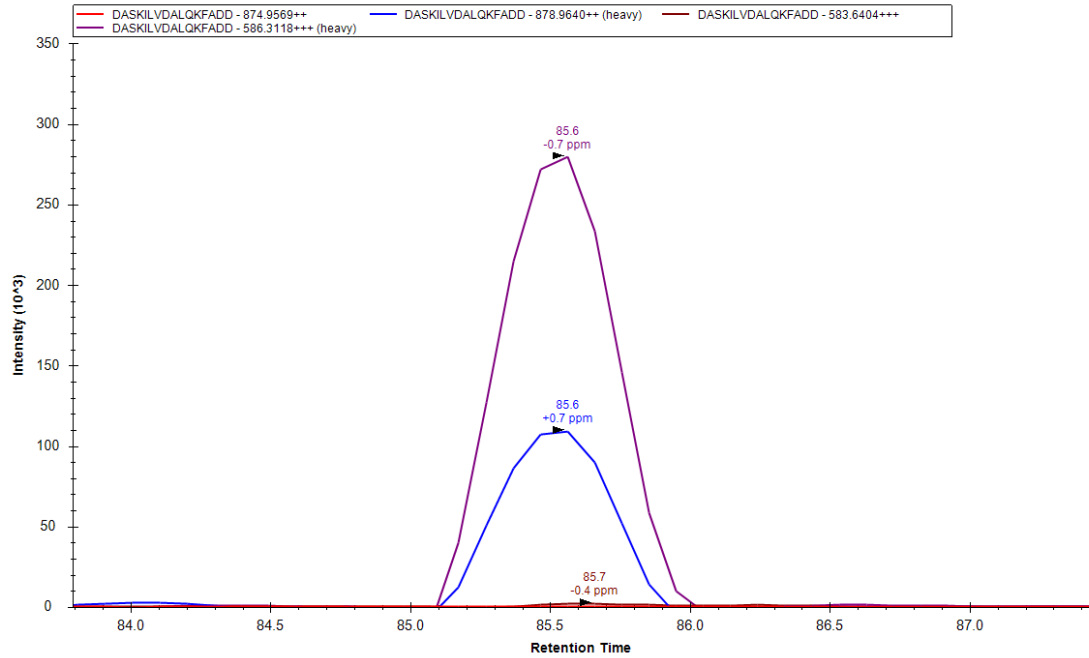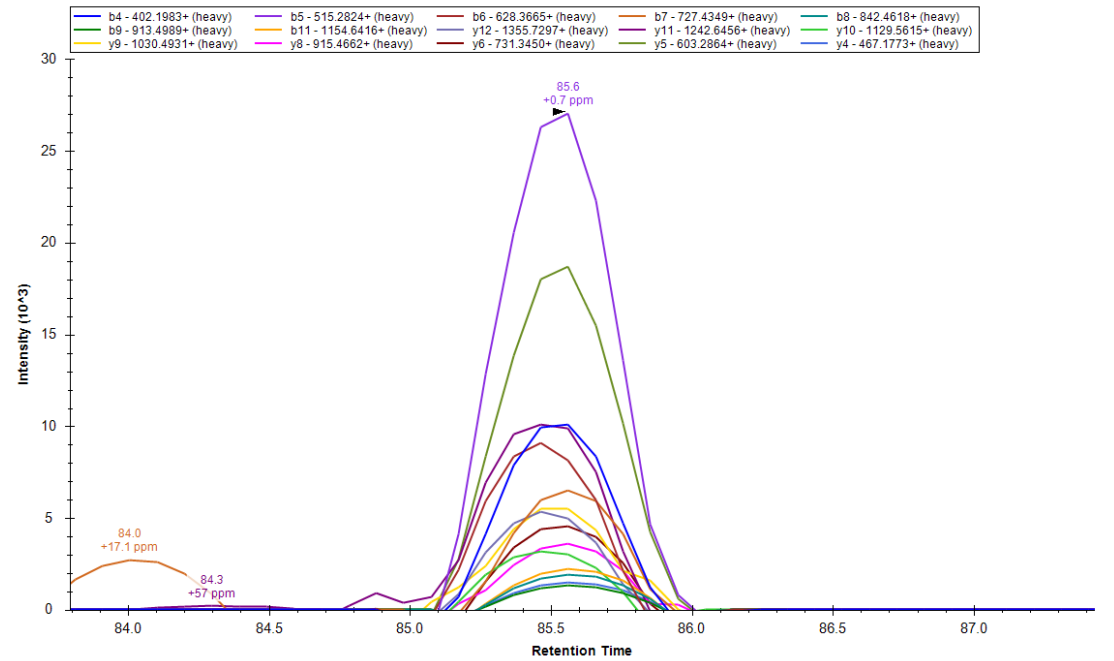

# DASKILVDALQKFADD

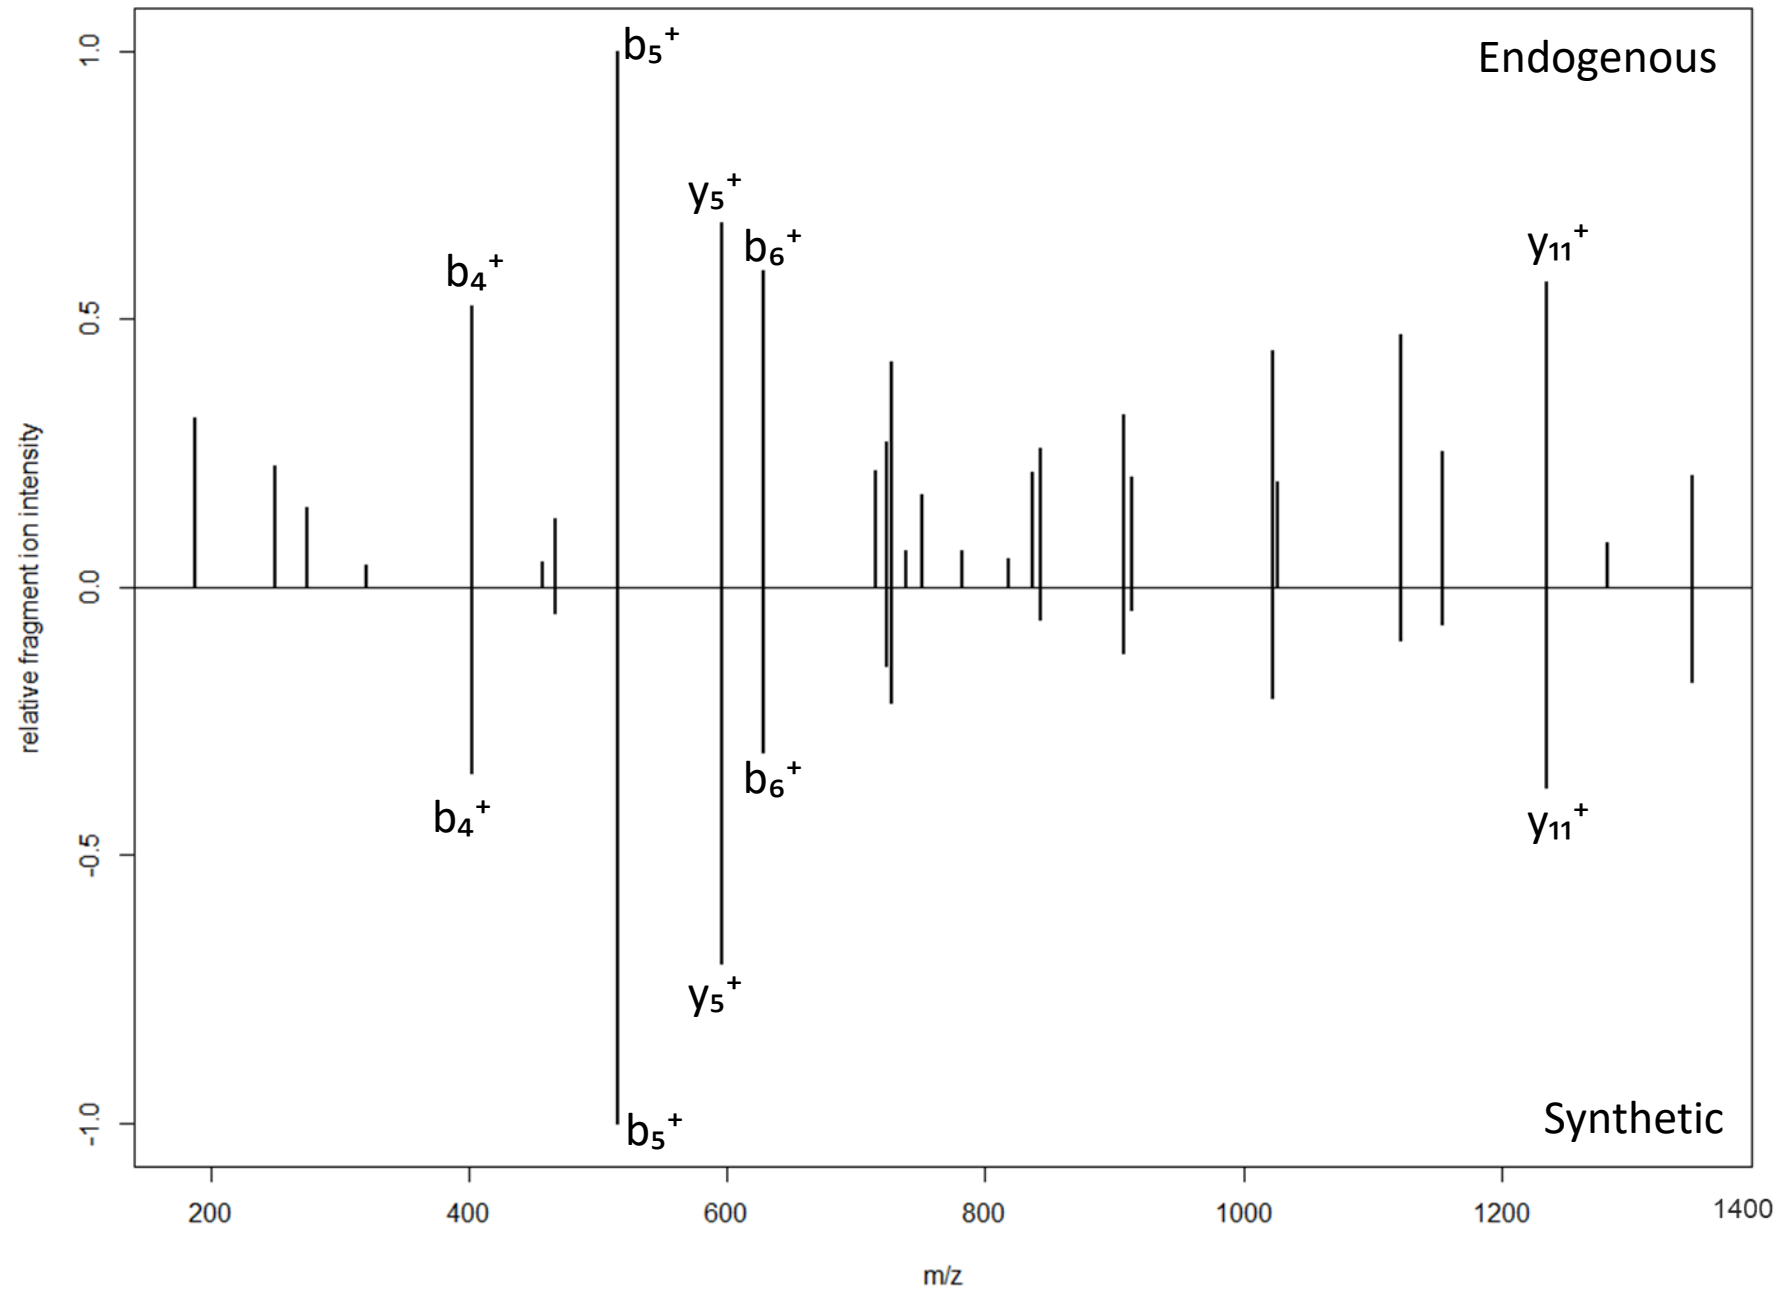

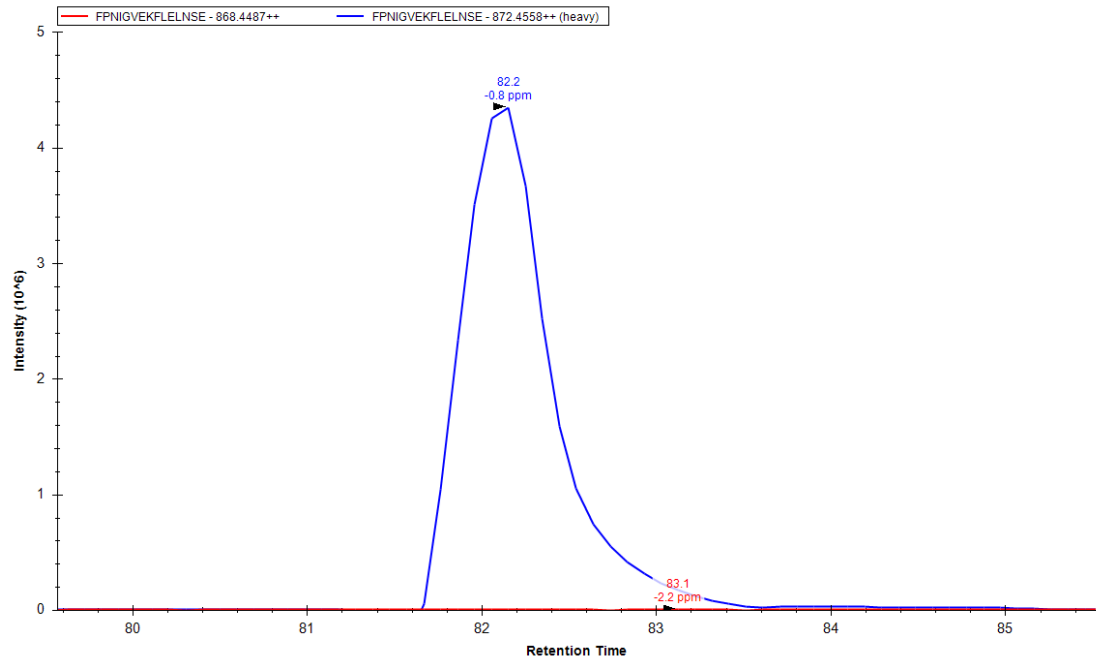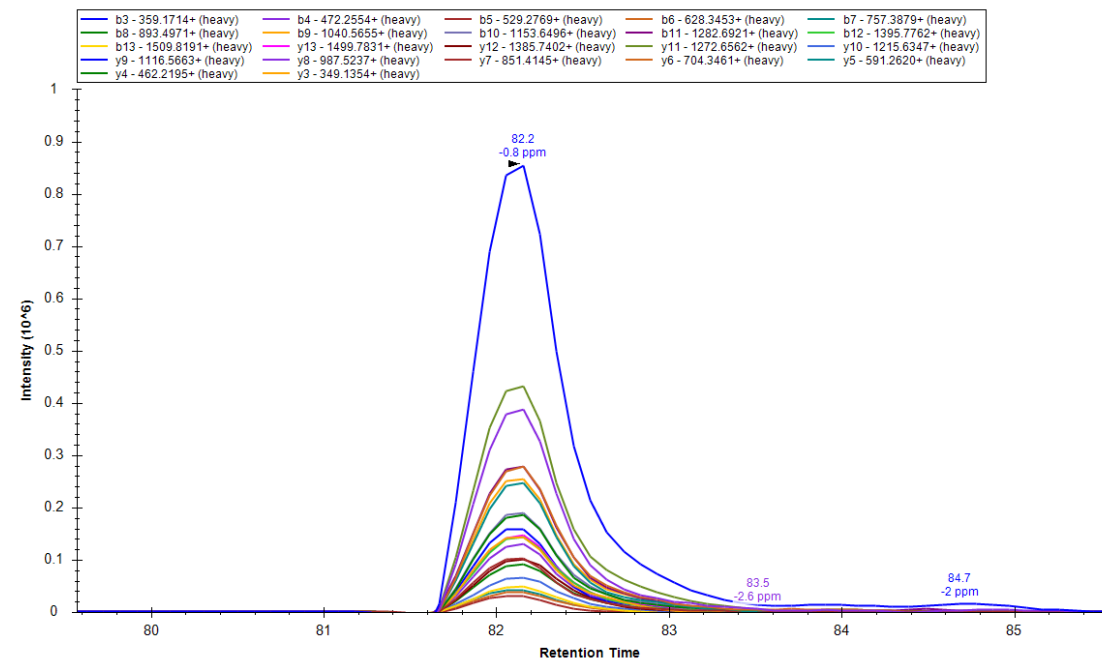

# FPNIGVEKFLELNSE

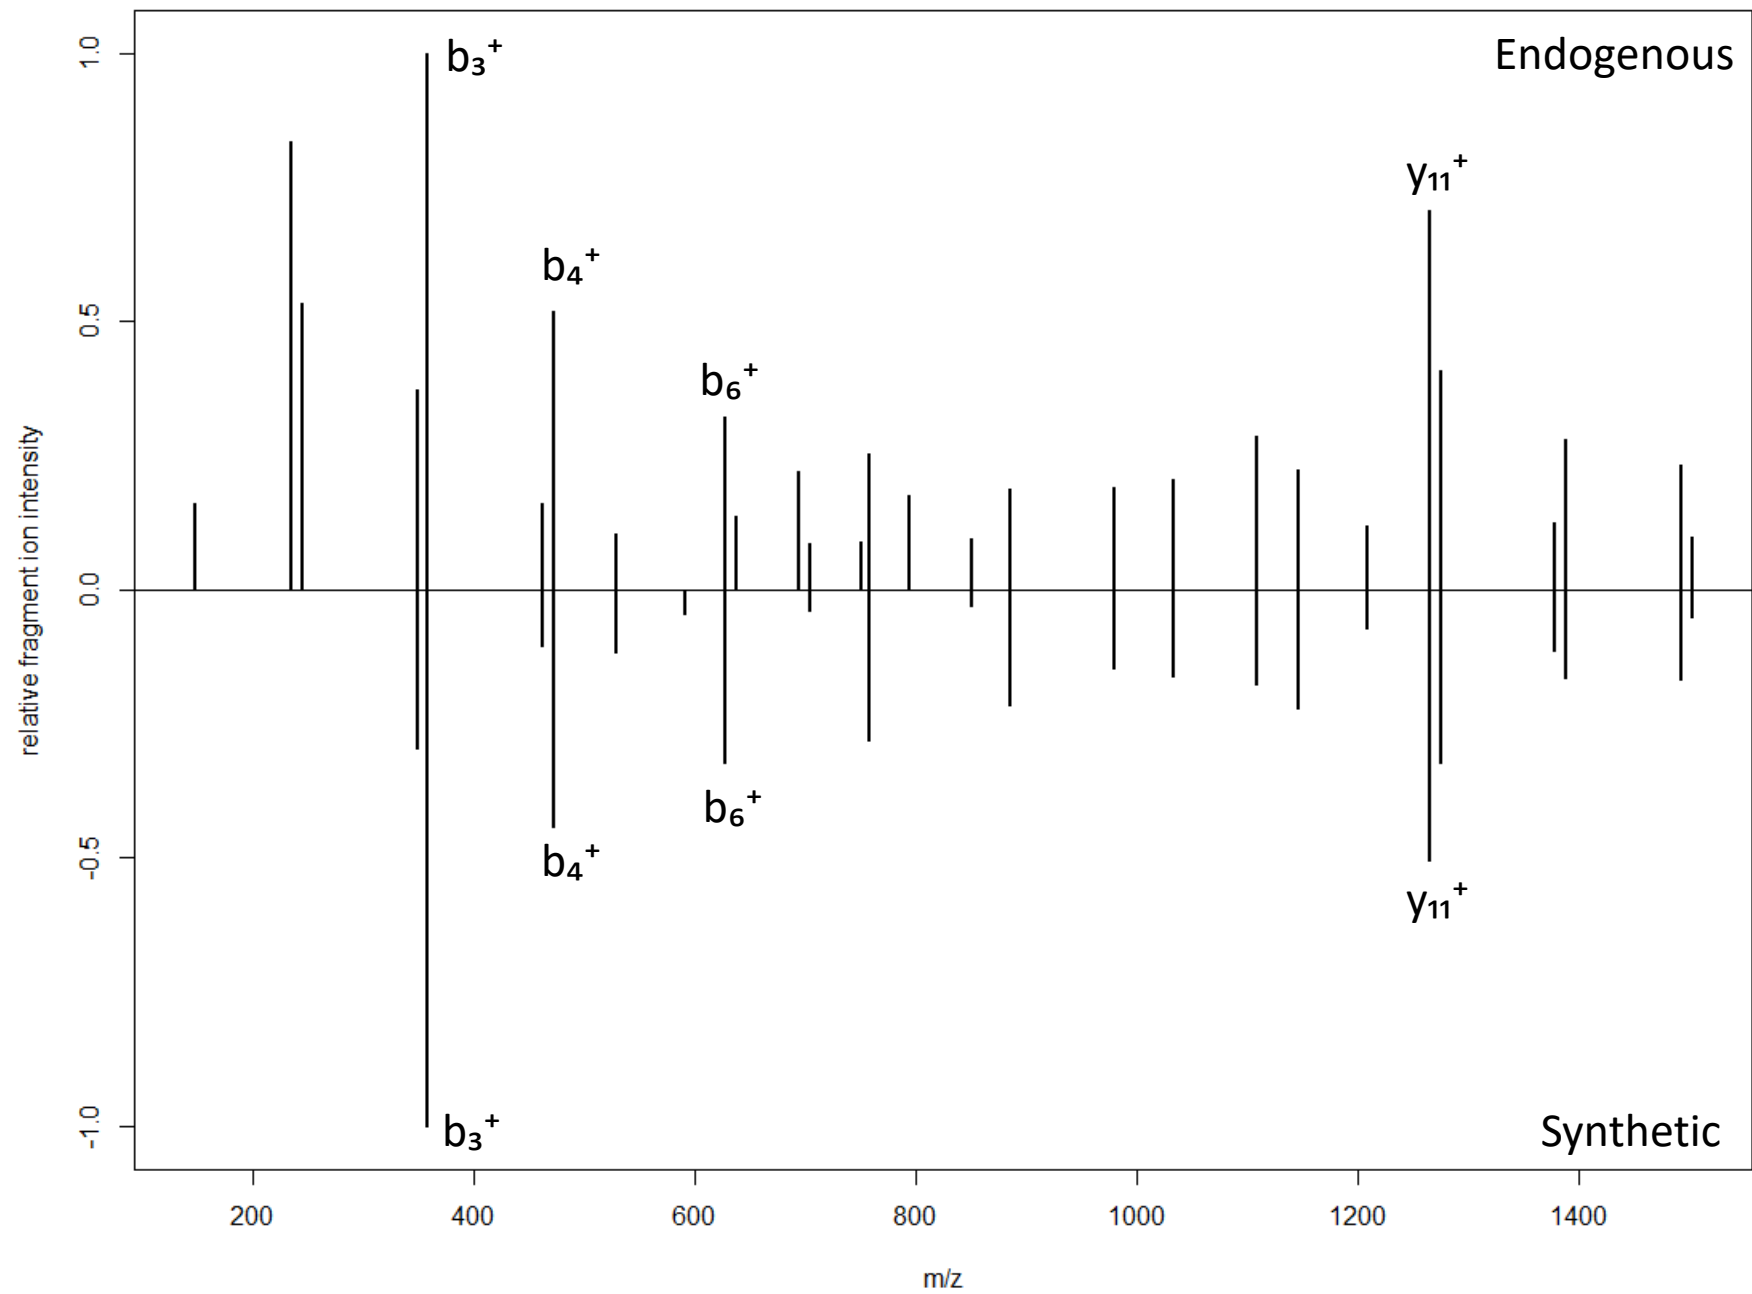

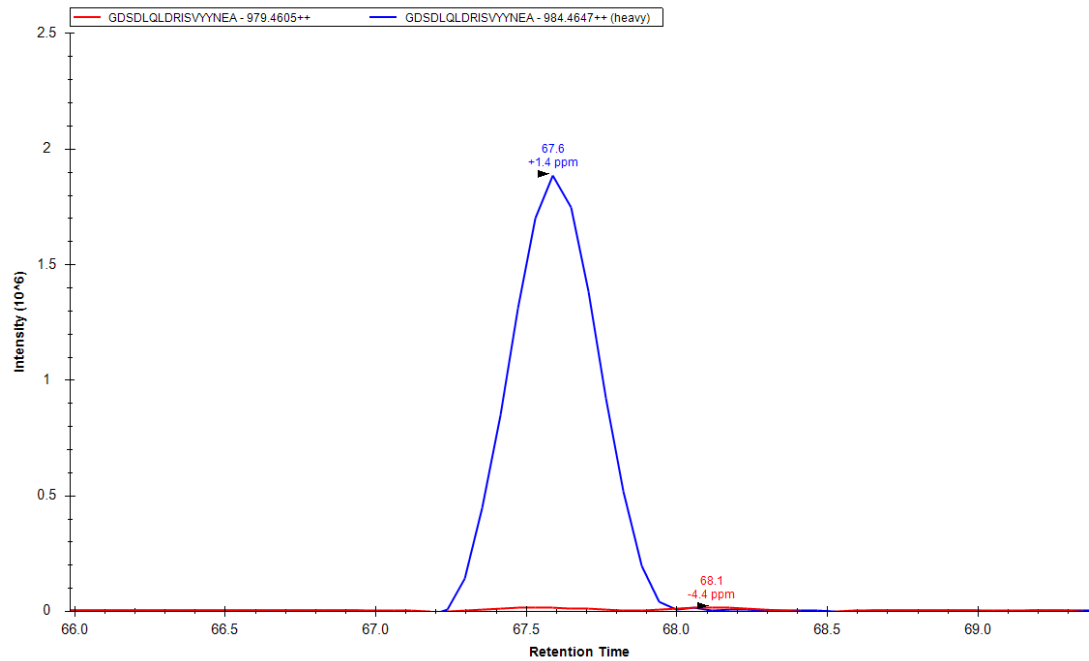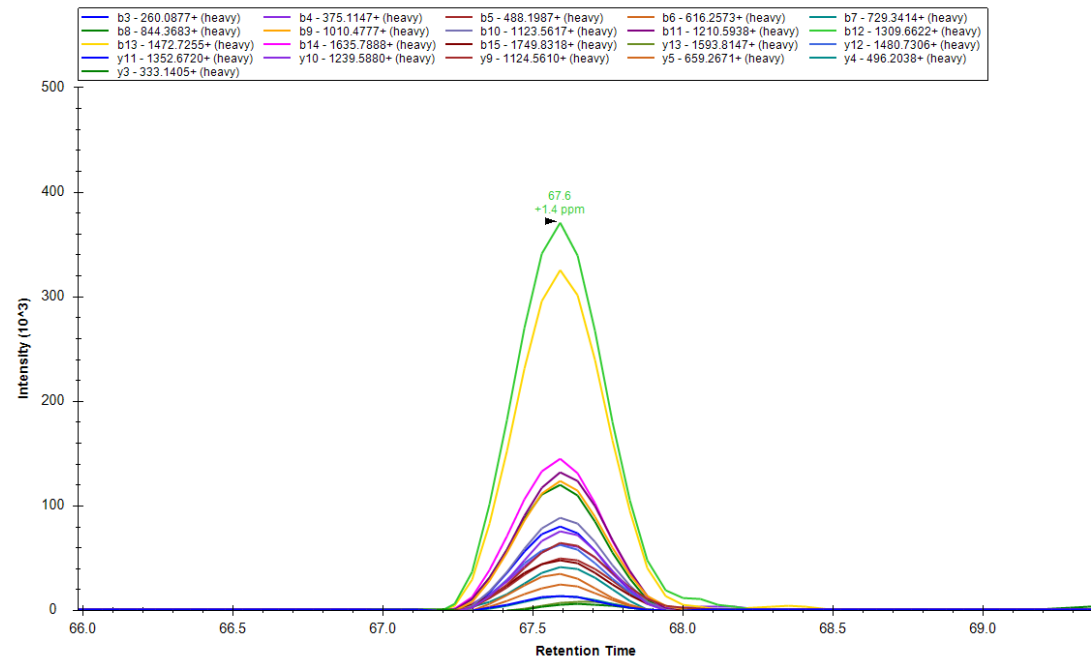



# GDSLQLDRISVYYNEA

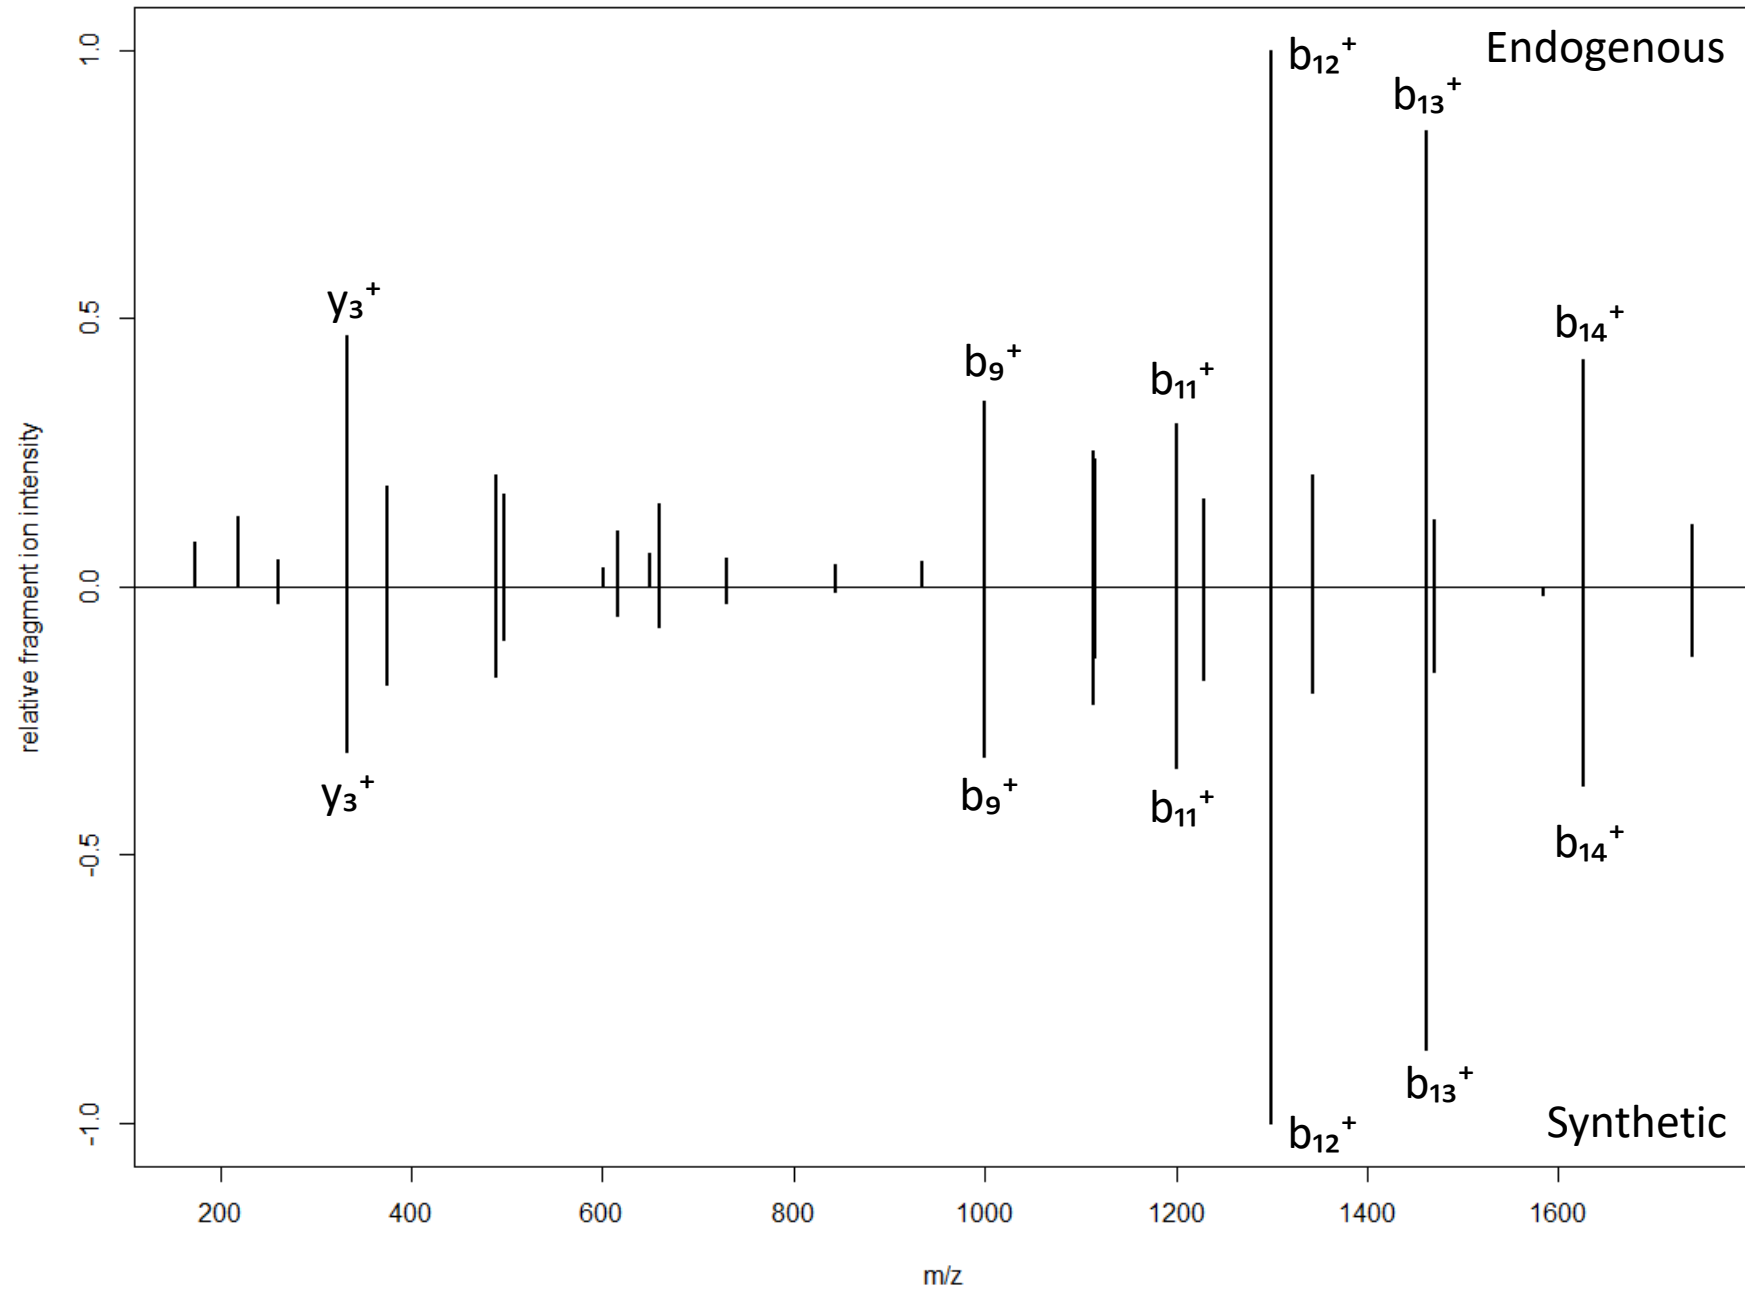

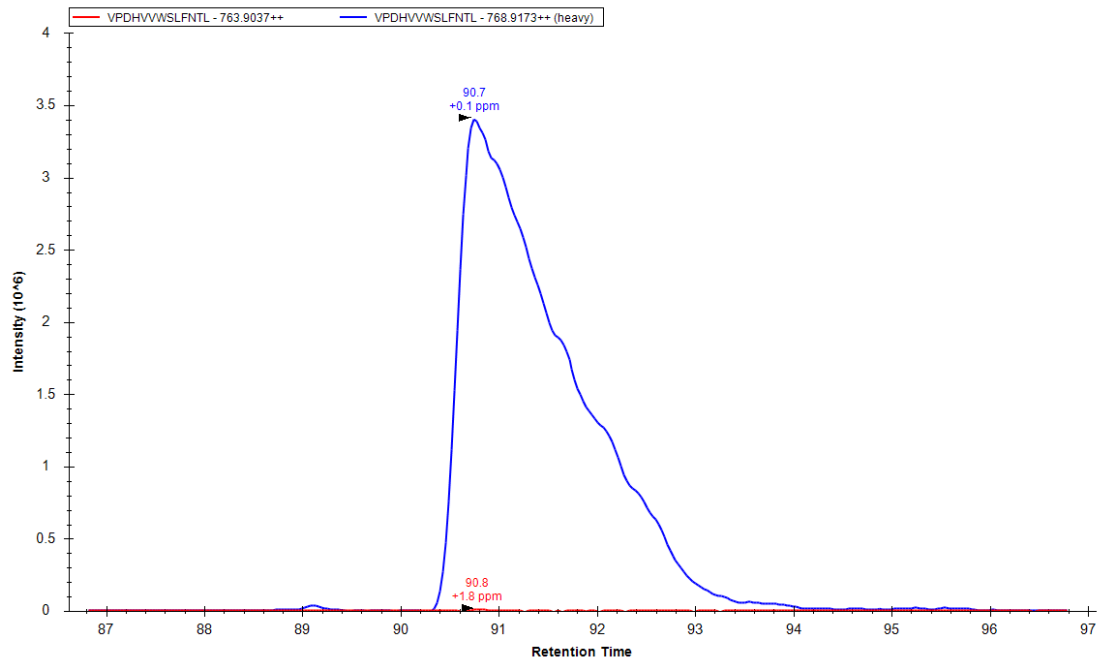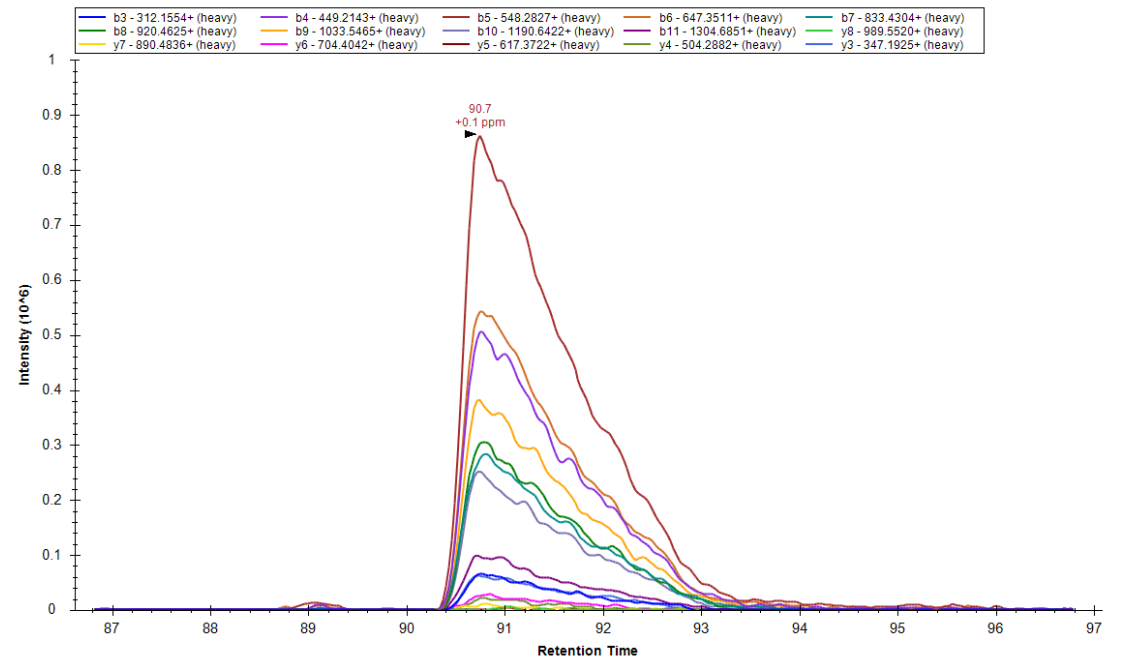

# VPDHVVWSLFNTL

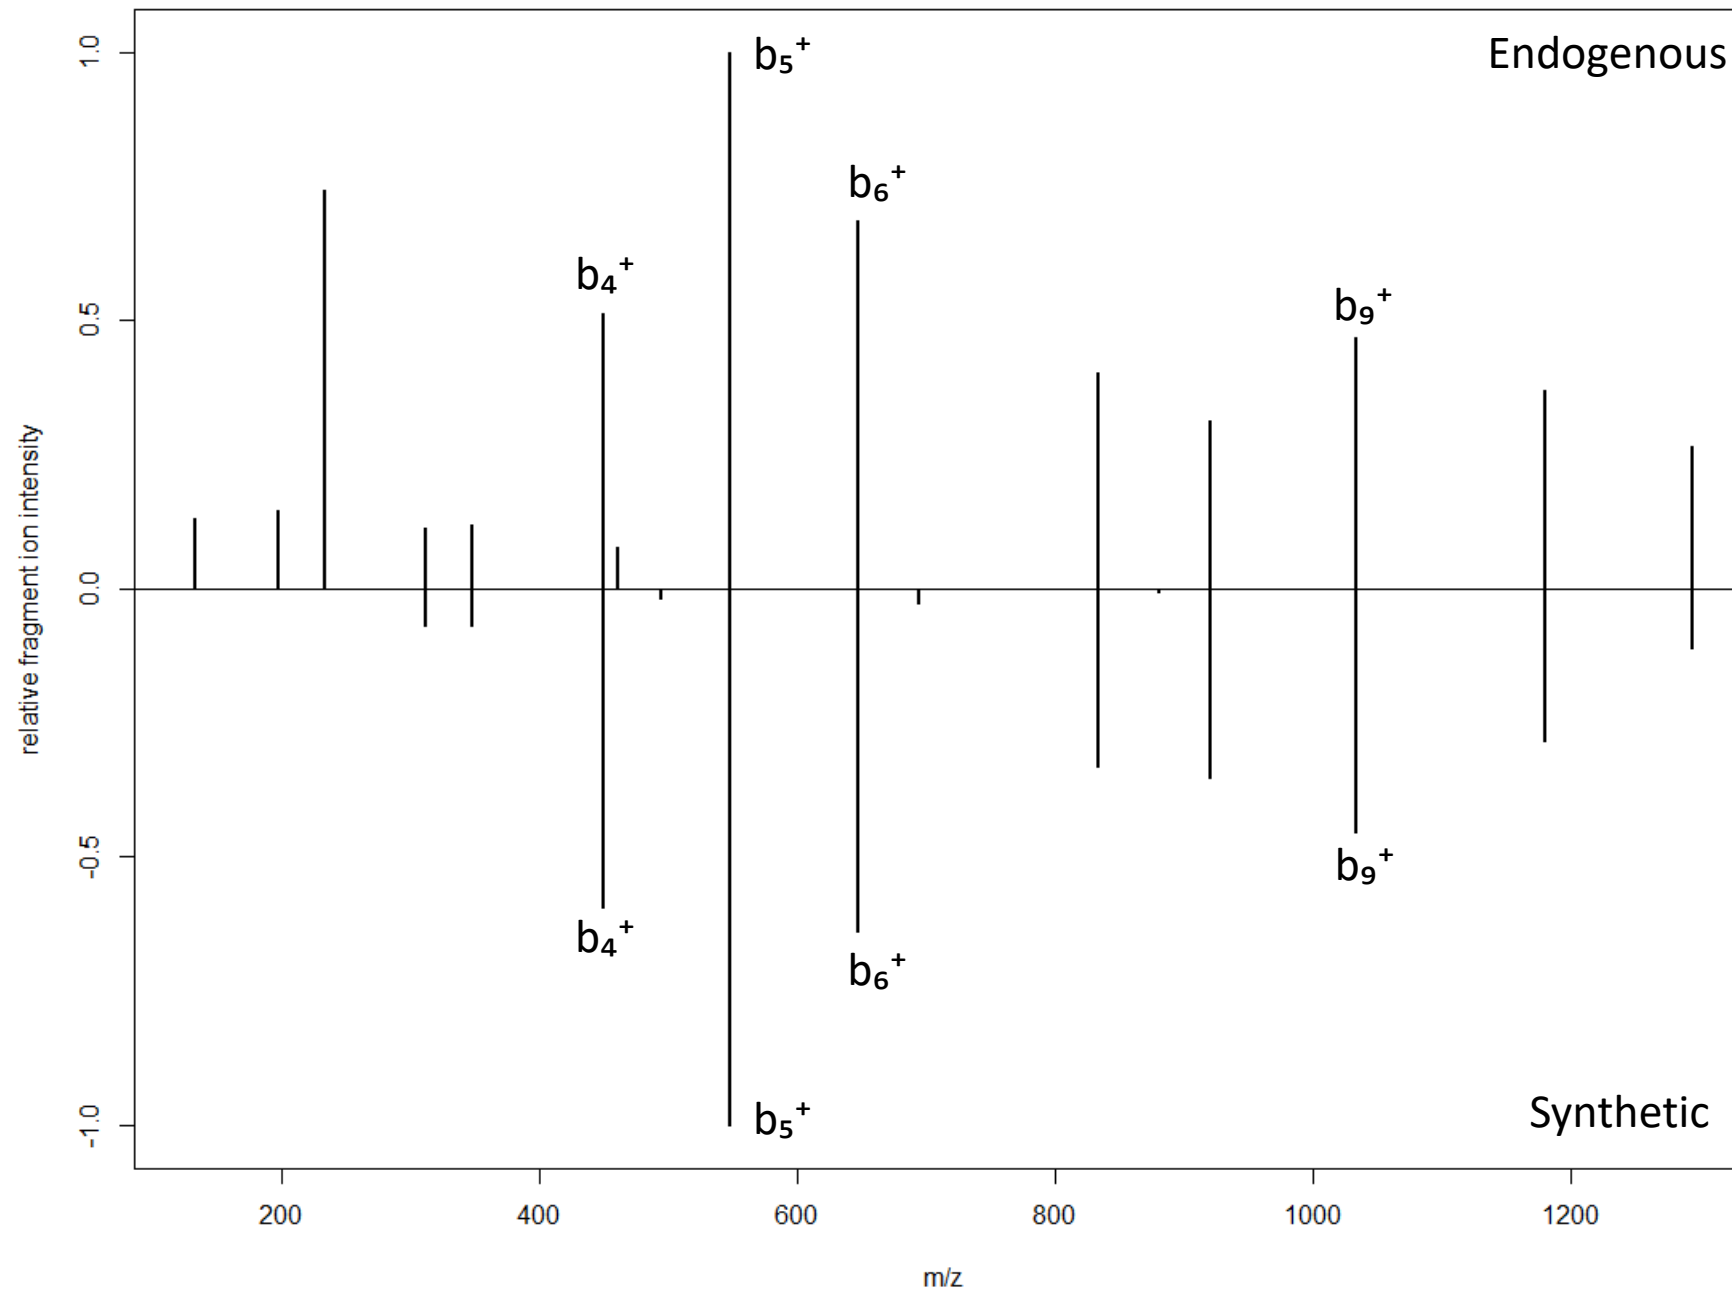

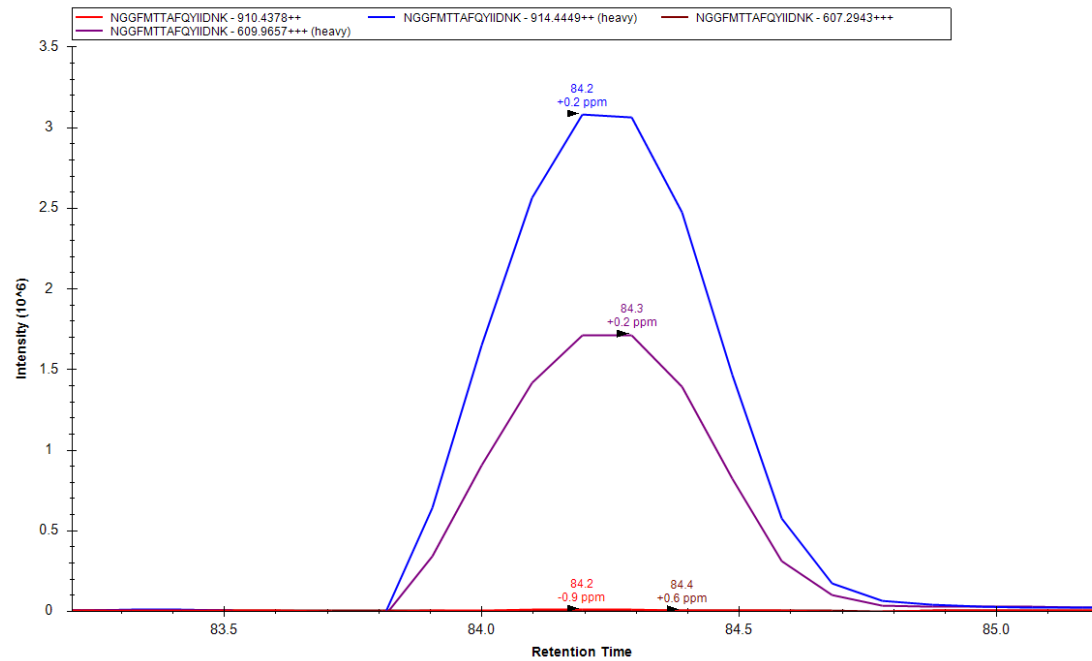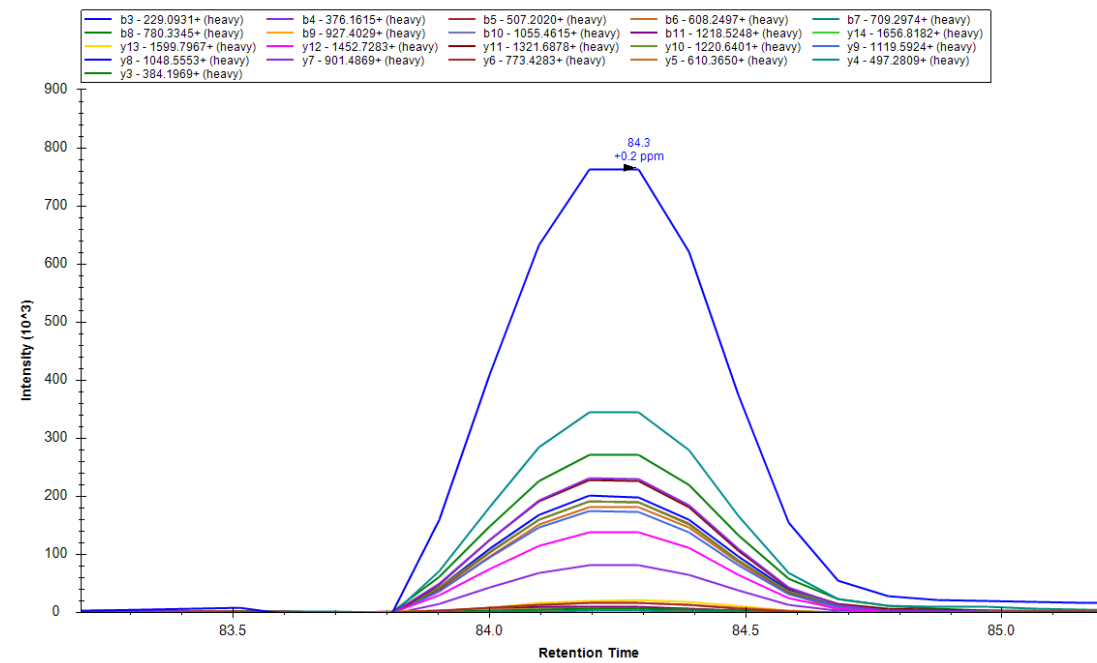

NGGFMTTAFQYIIDNK

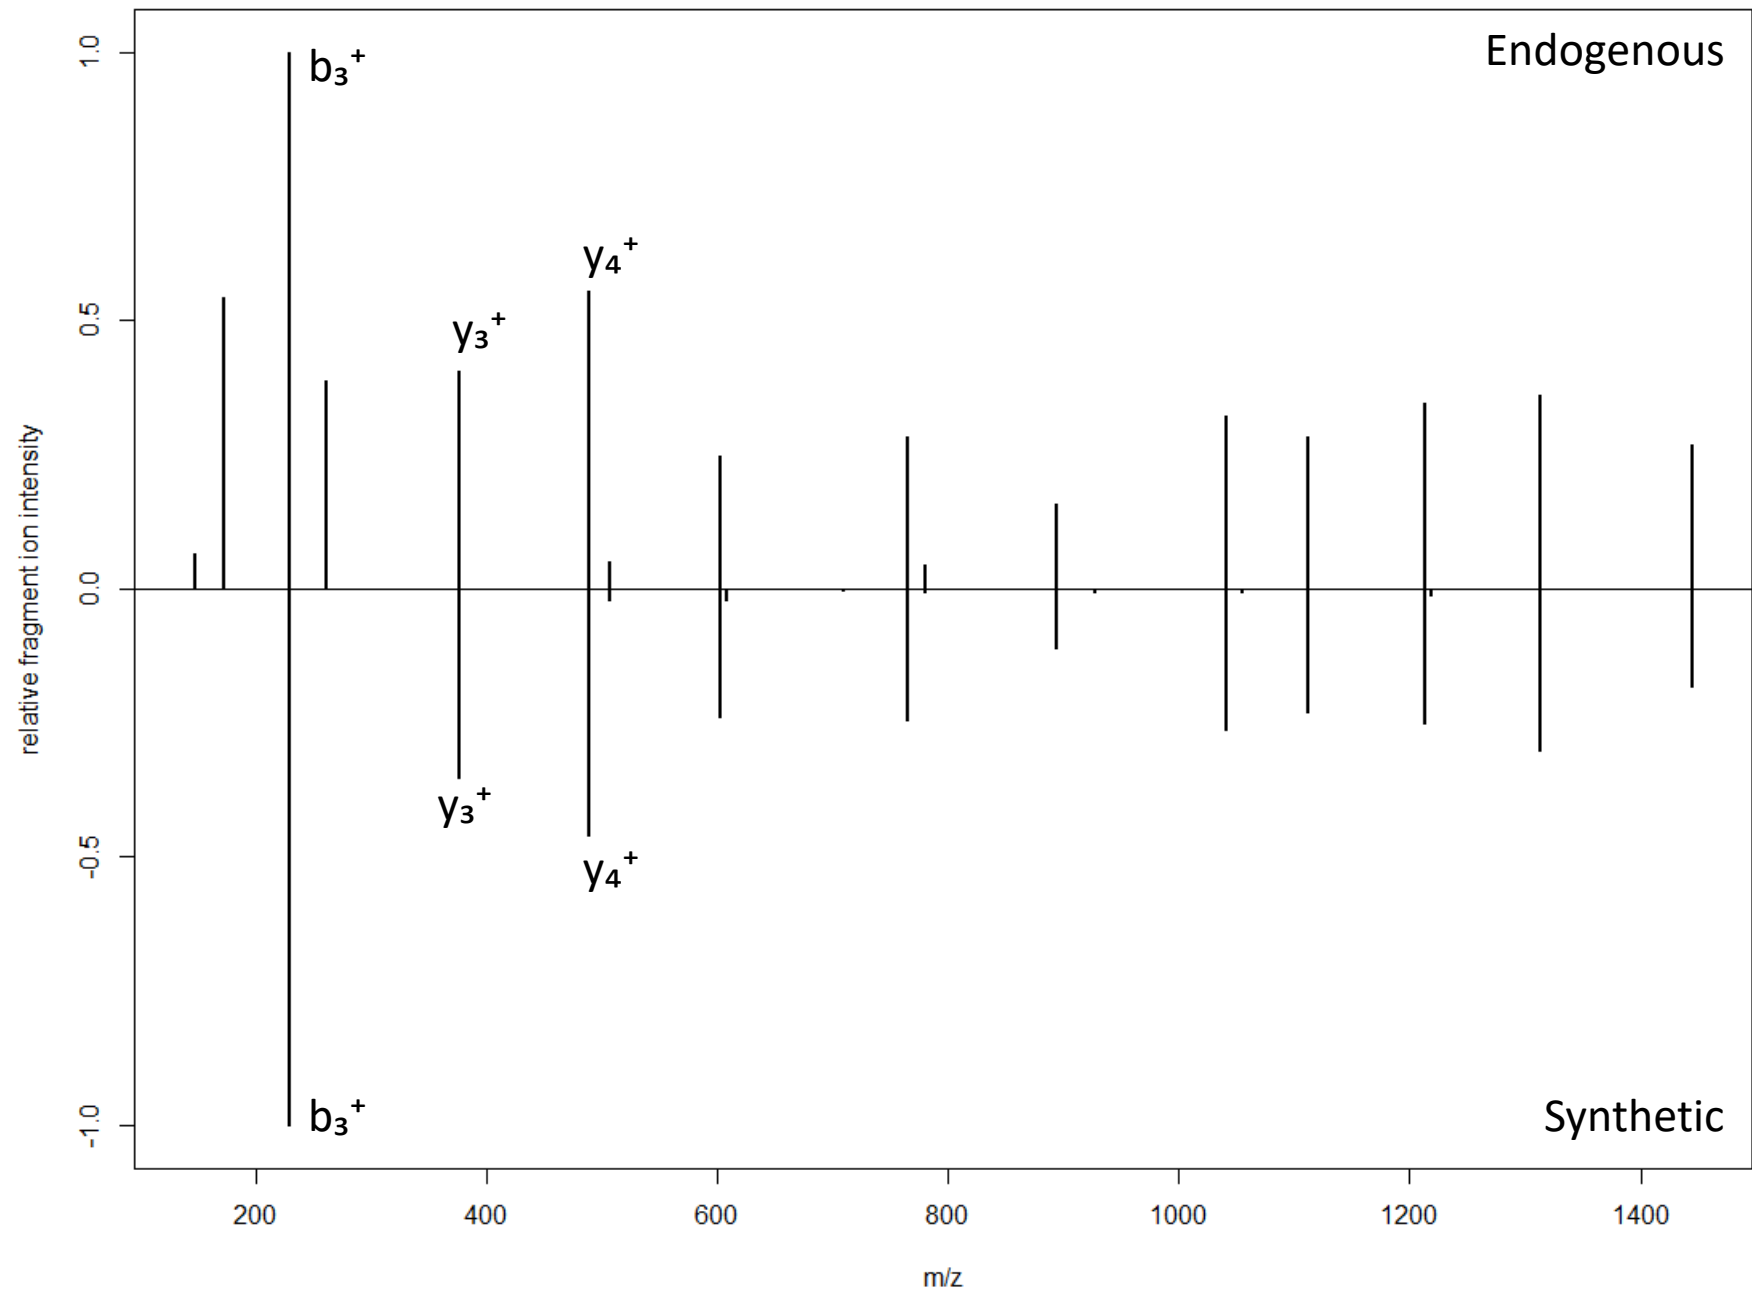

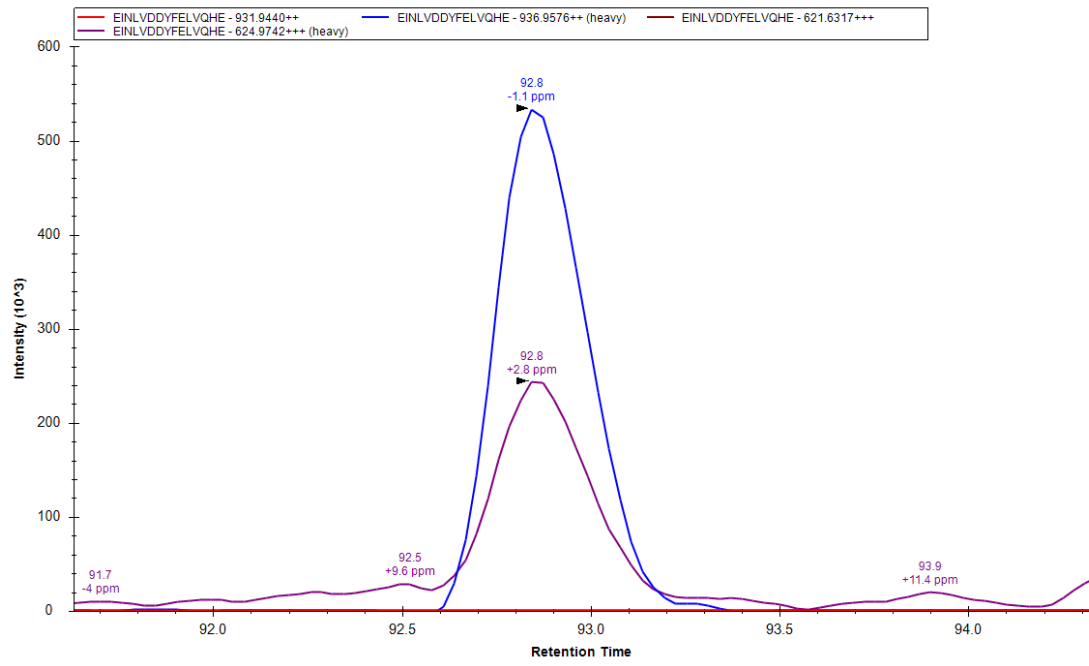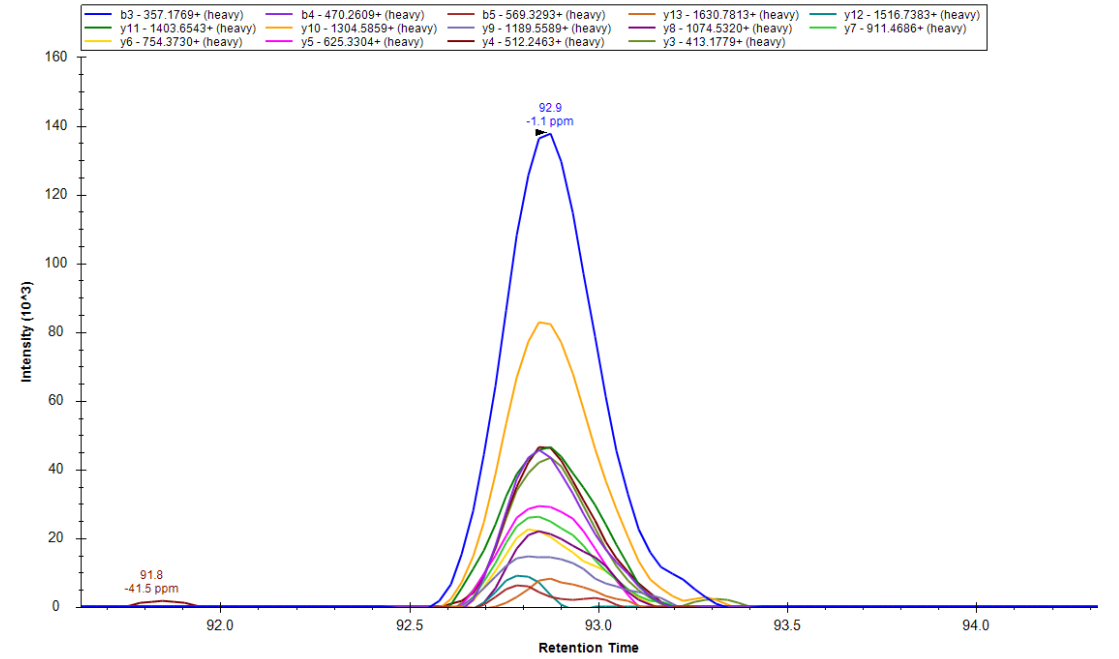

EINLVDDYFELVQHE

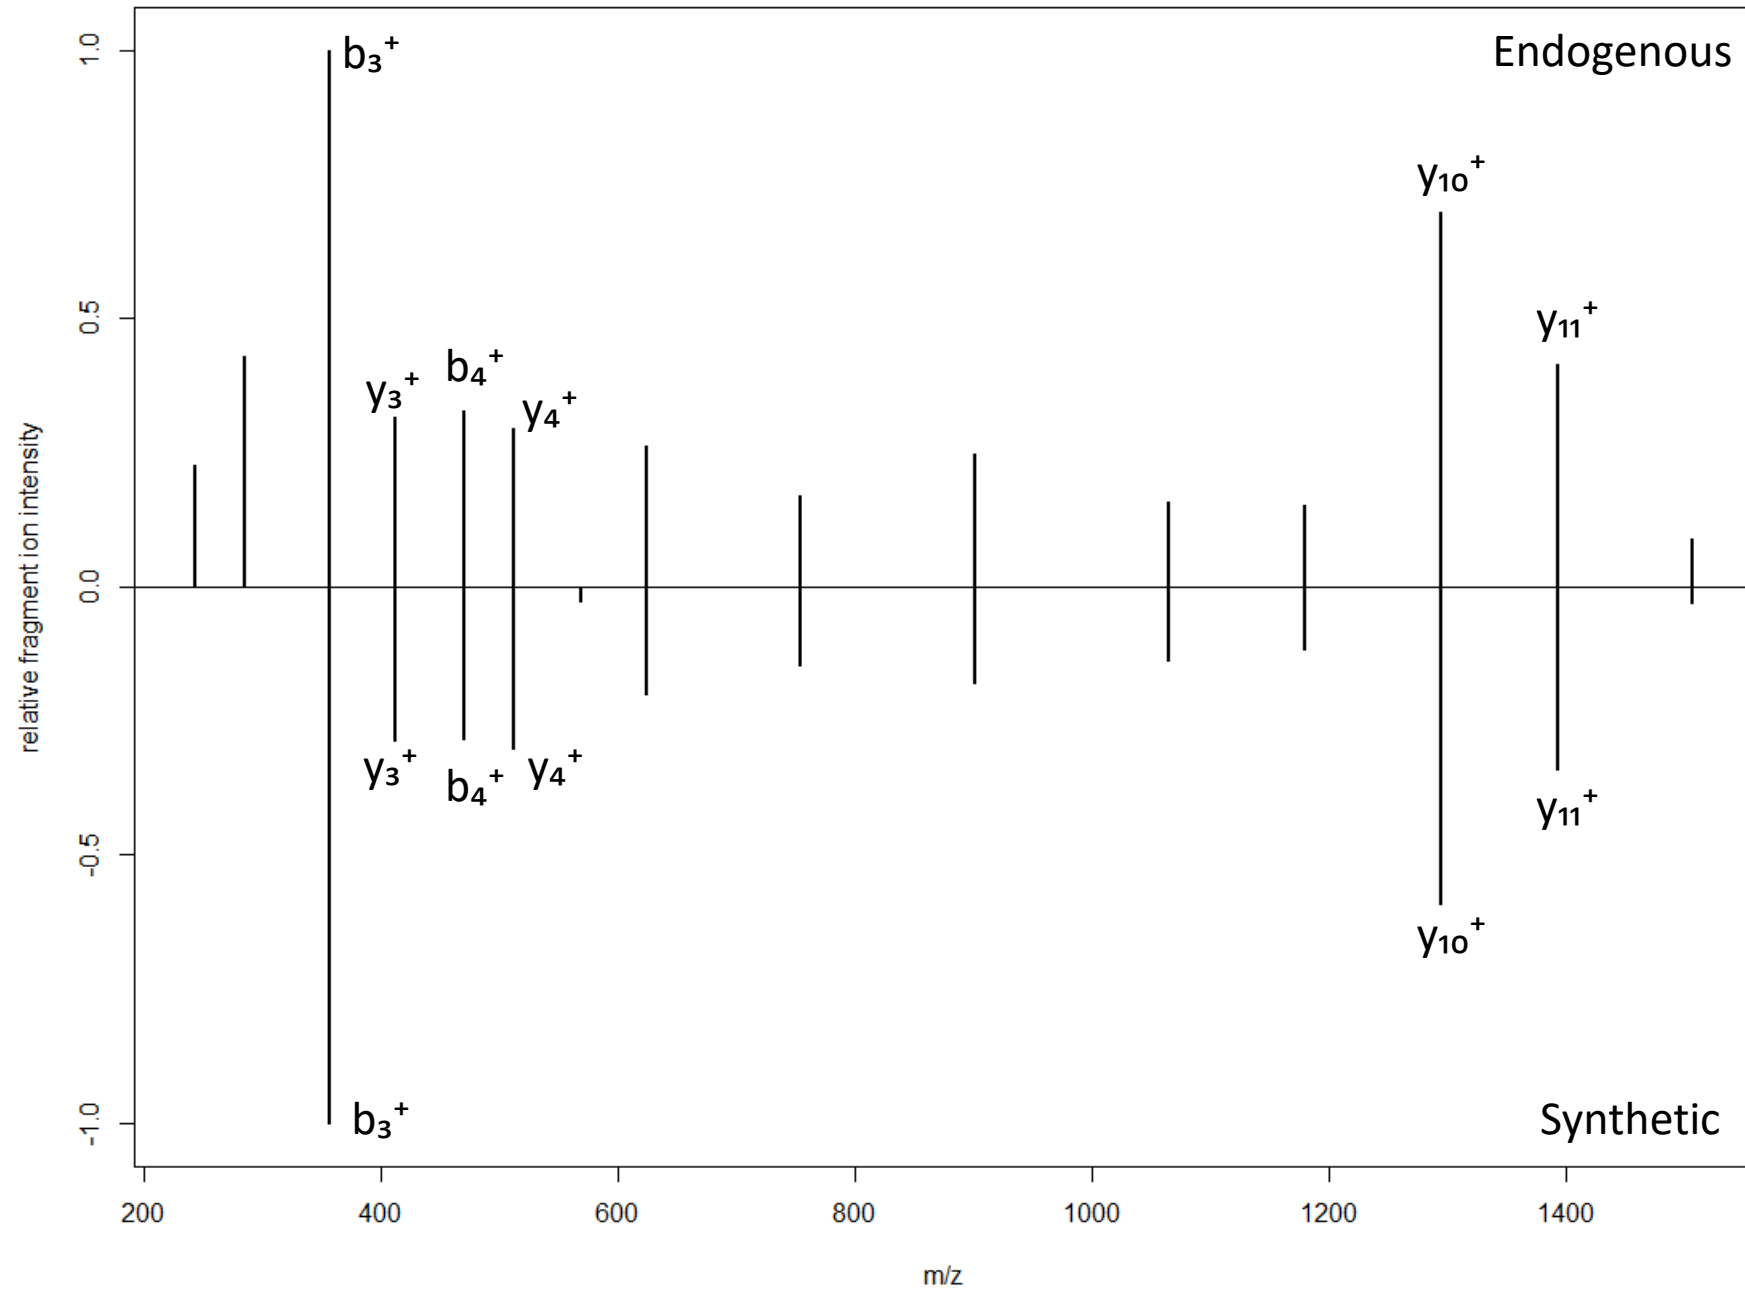

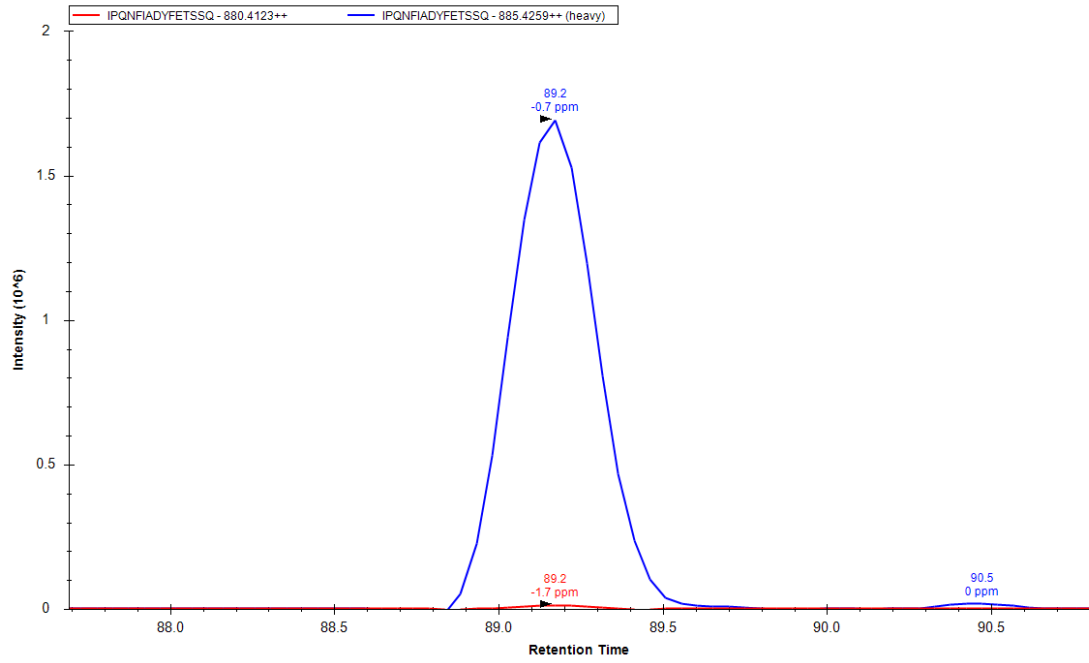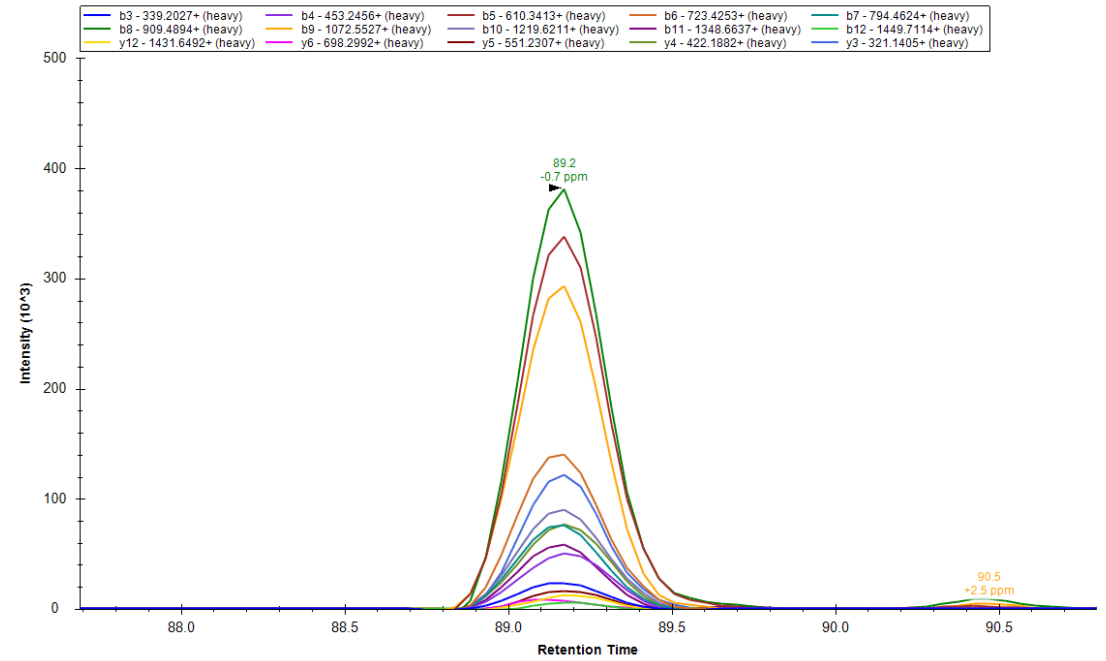



IPQNFADYFETSSQ

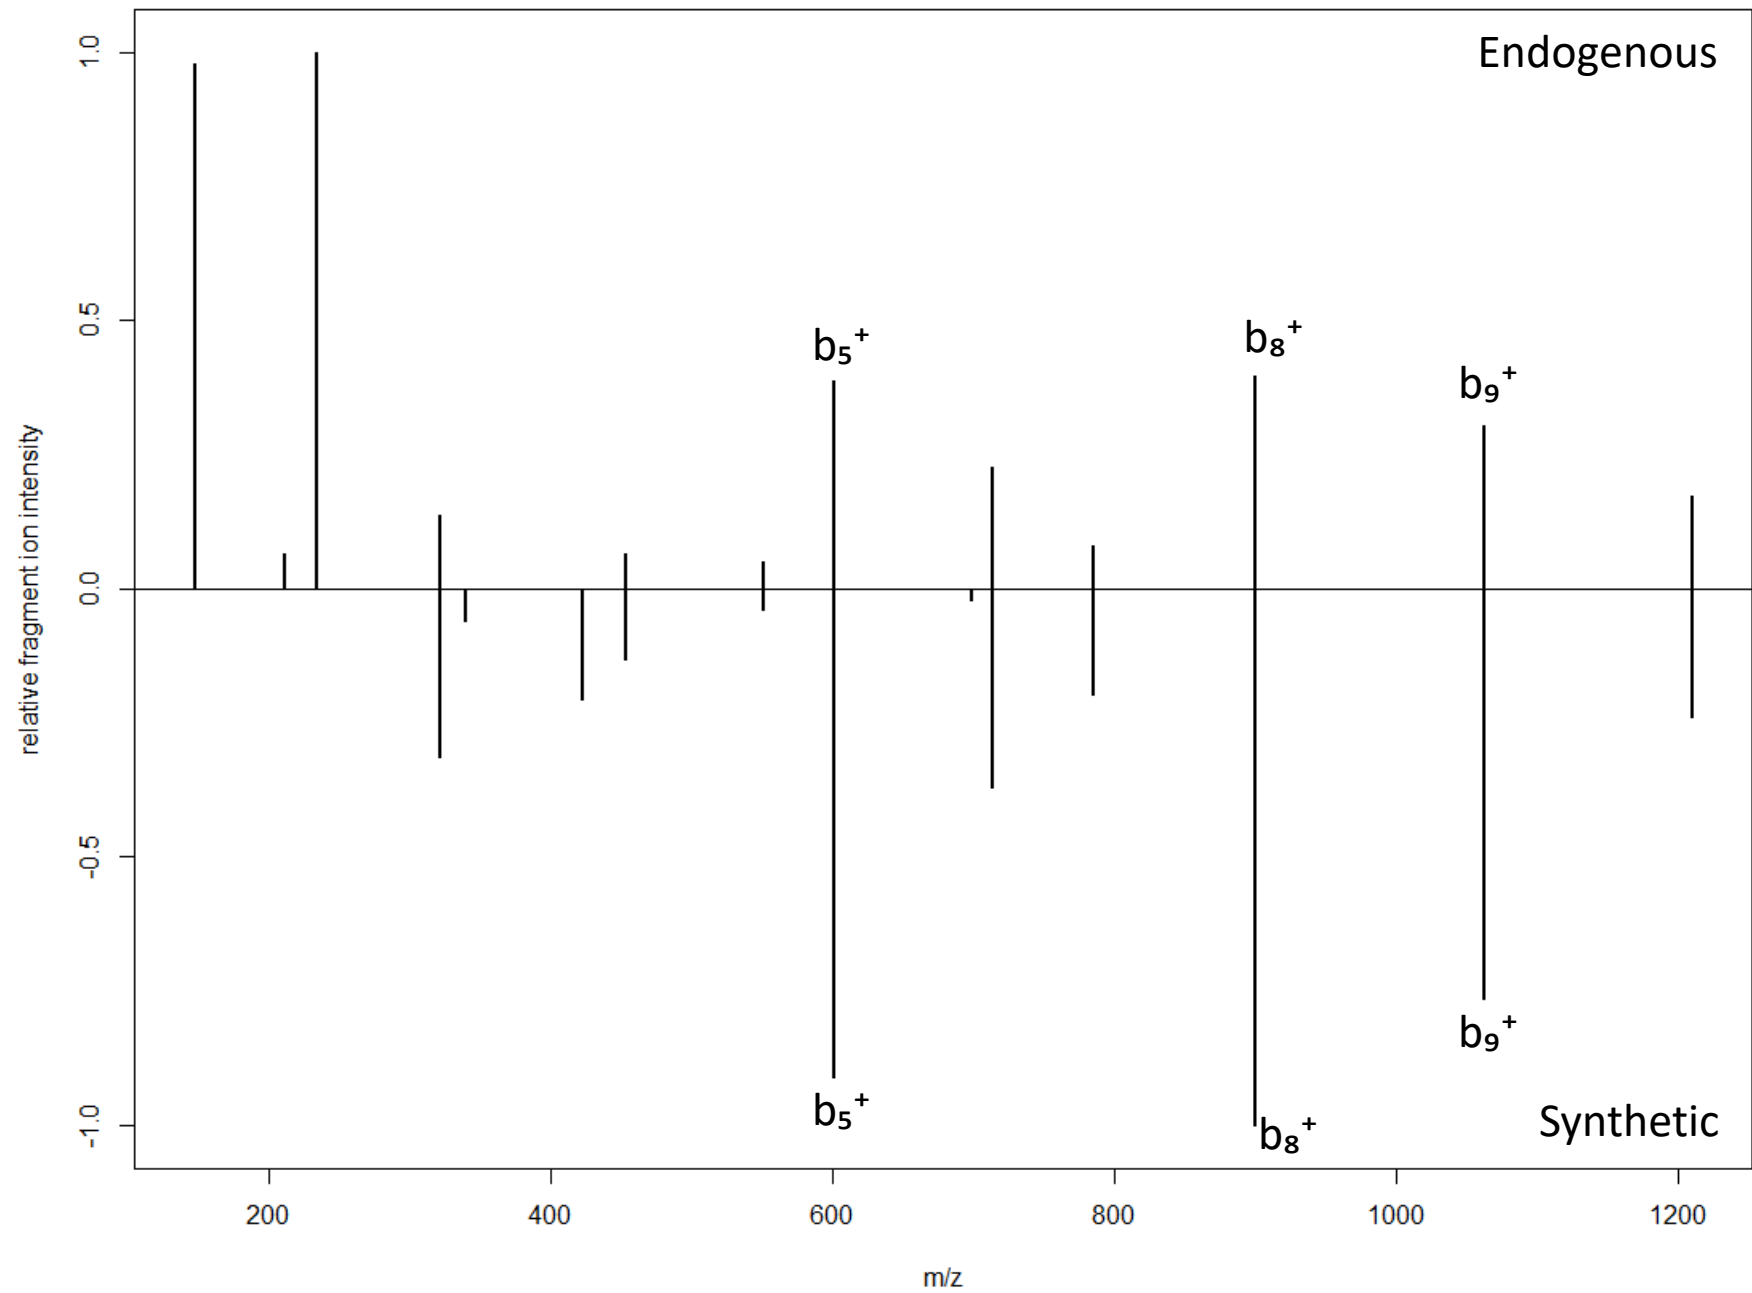

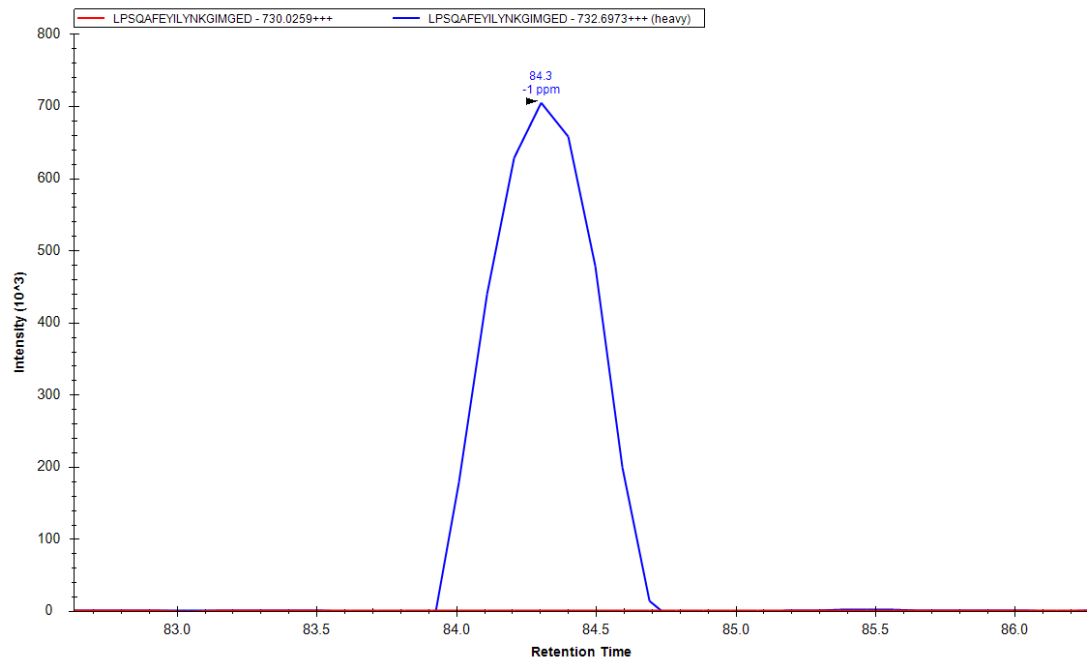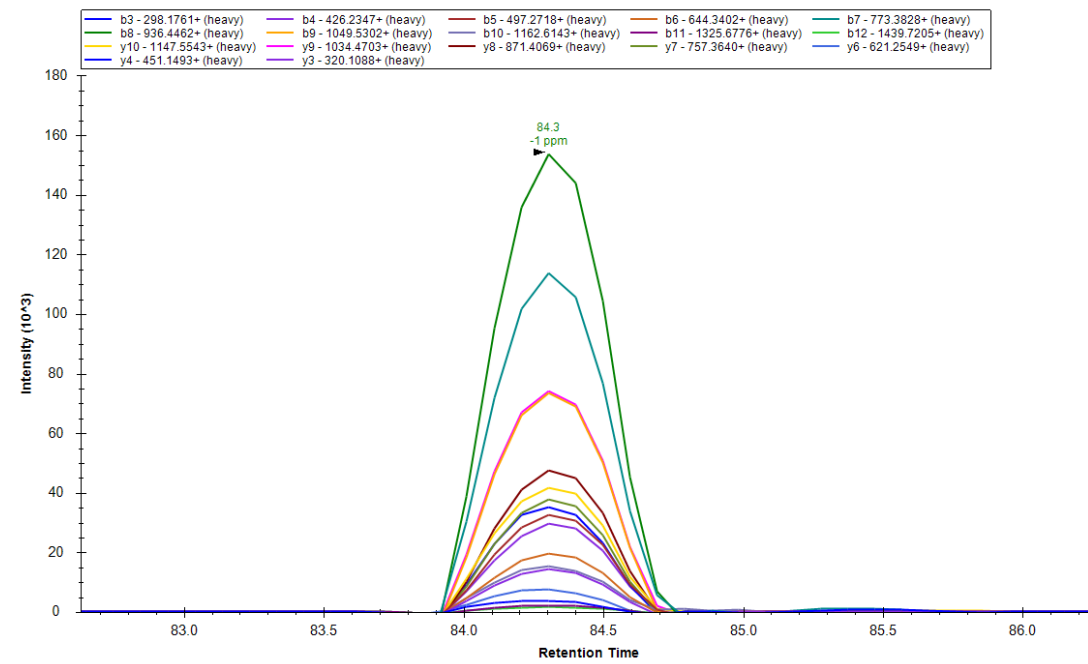

# LPSQAFEYILYNKGIMGED

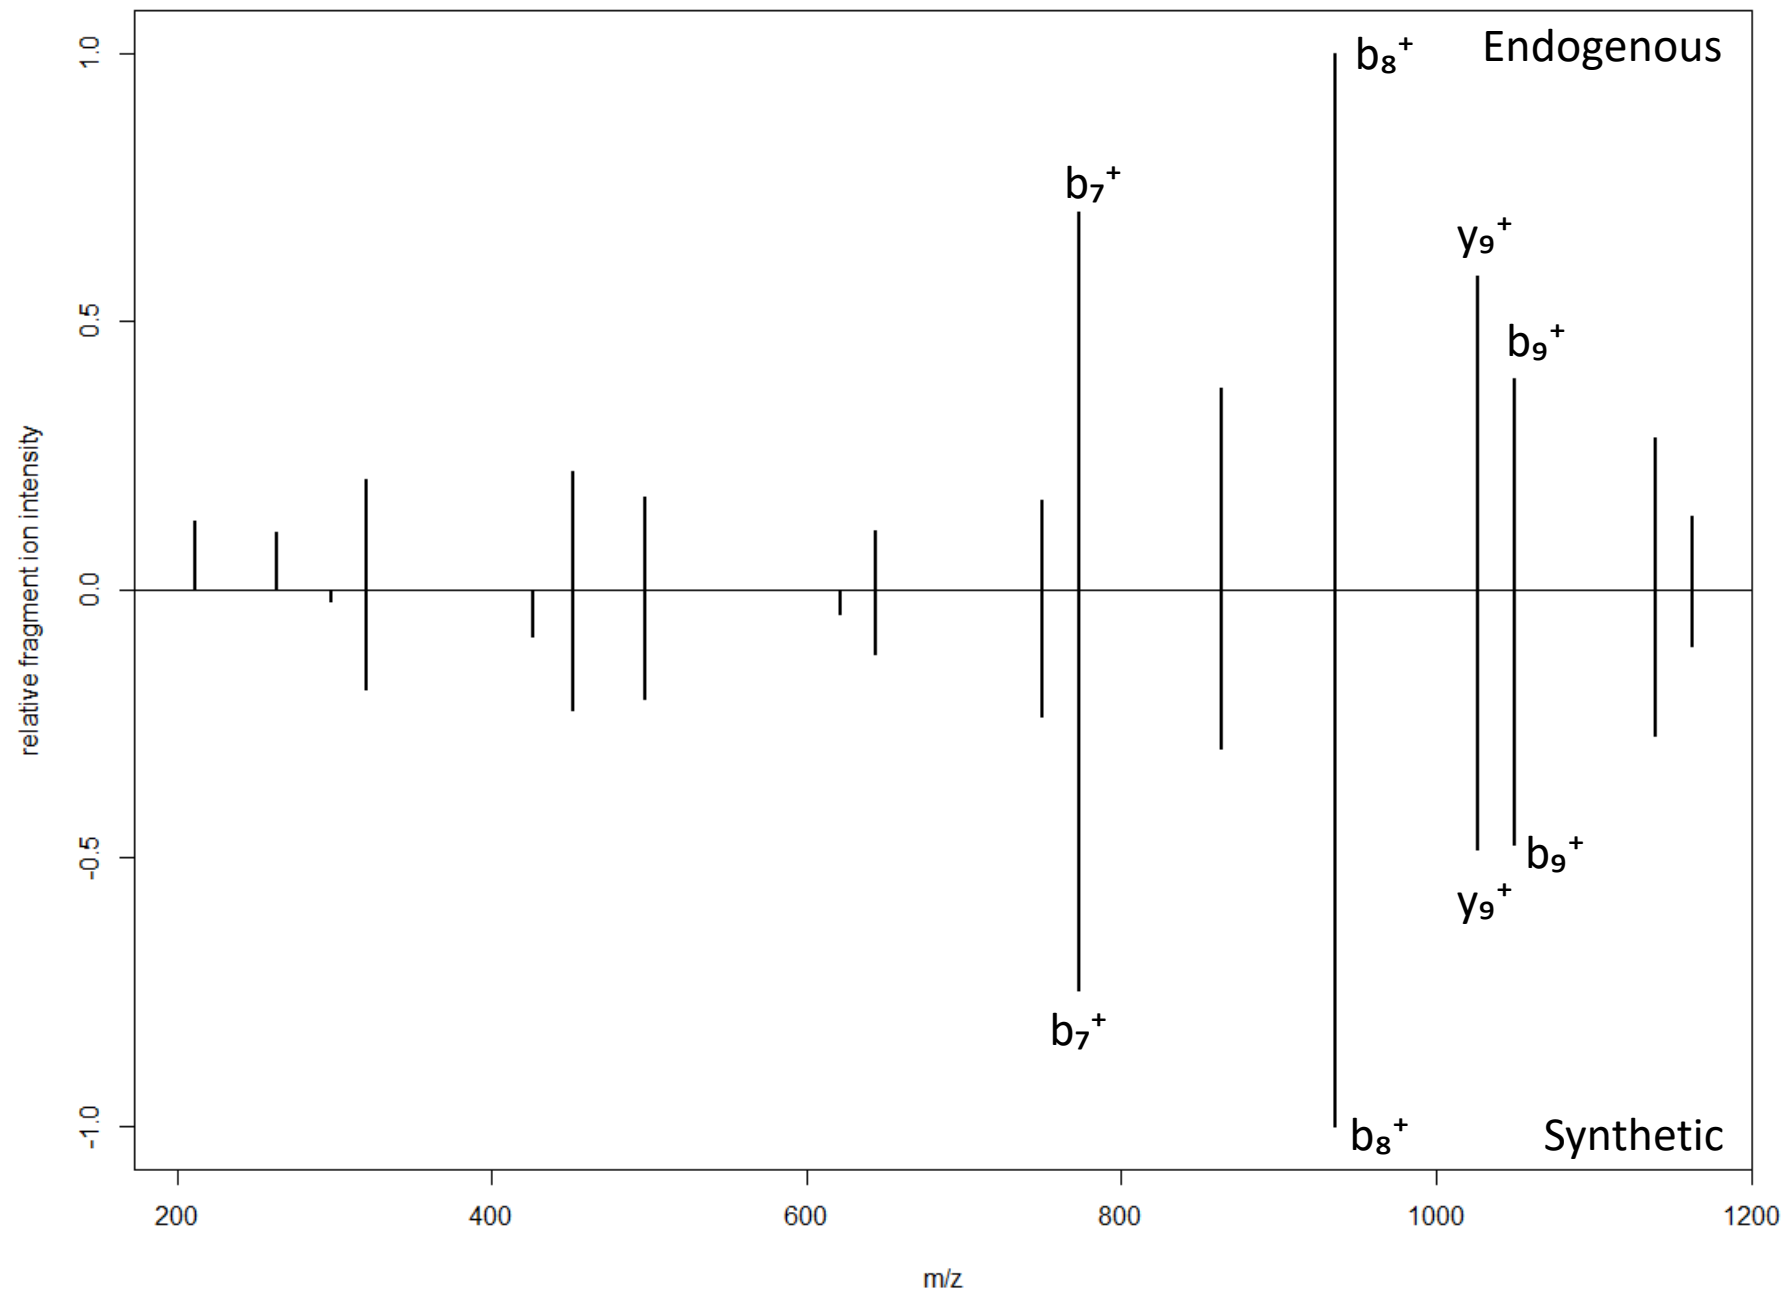

**Fig. S9**

**S9A**

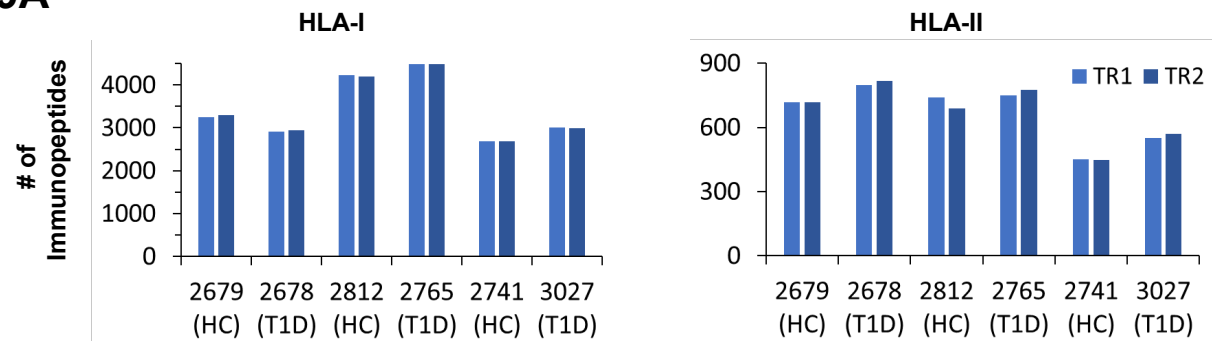

**S9B**

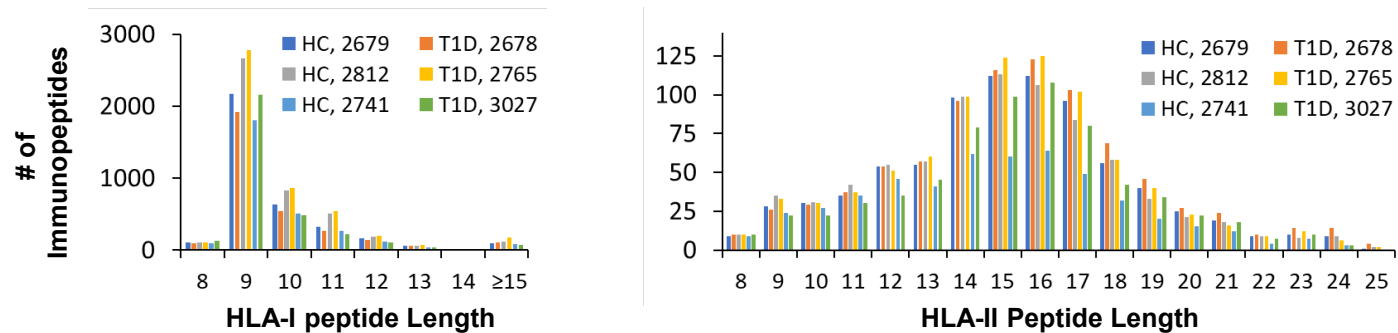

Fig. S10

S10A

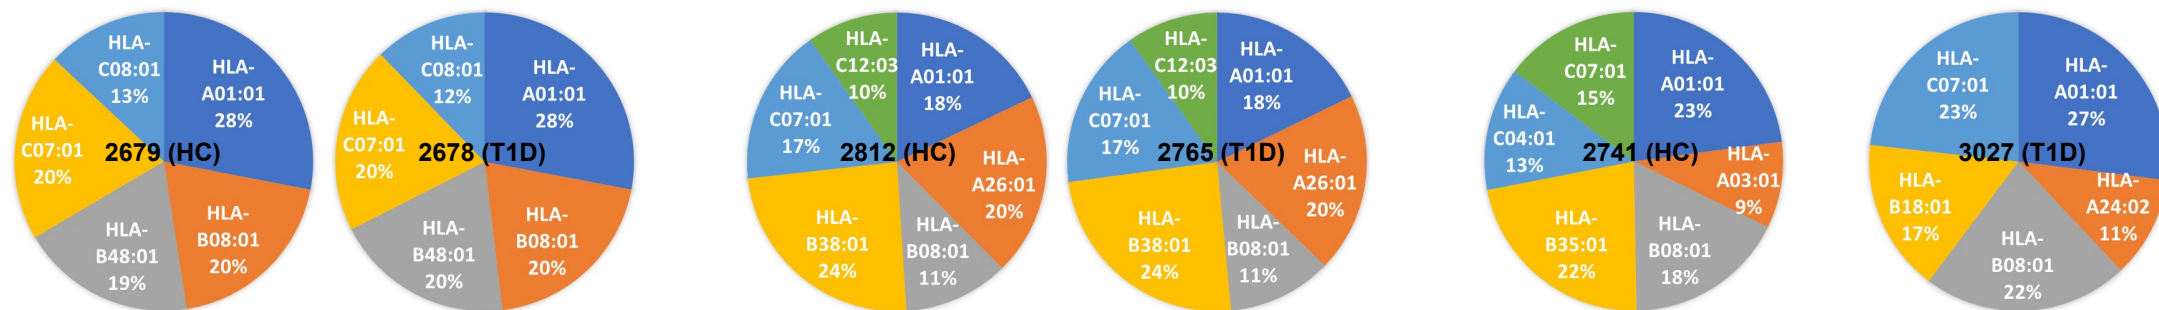

S10B

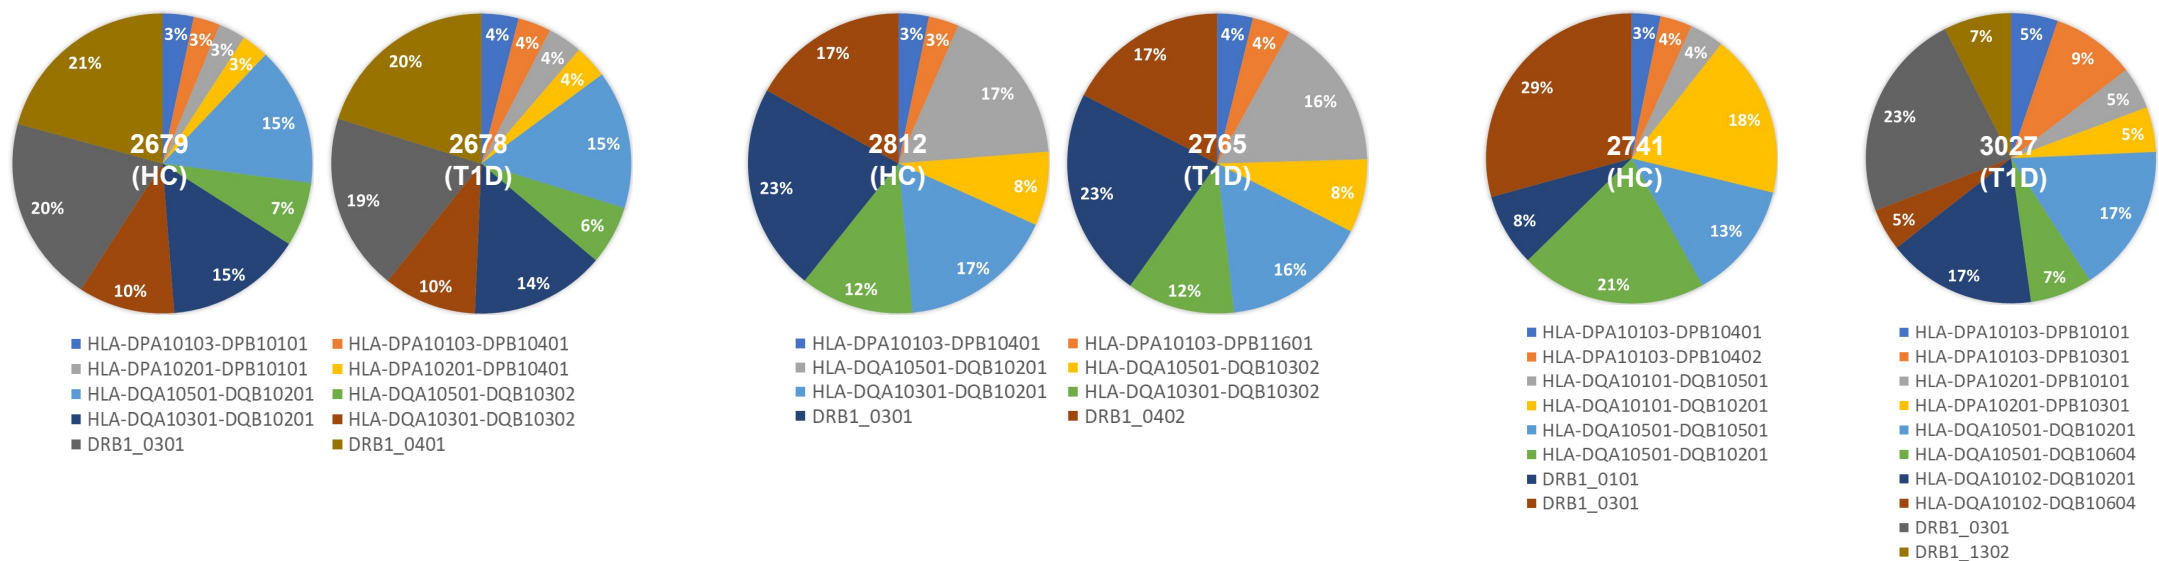

**Fig. S11**

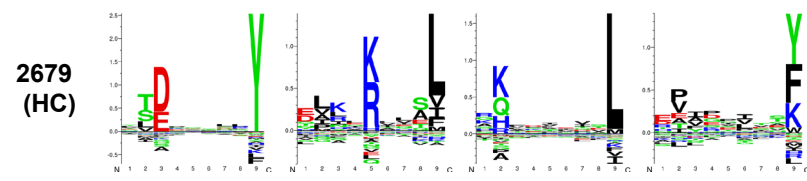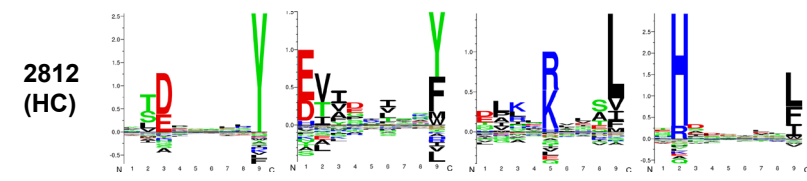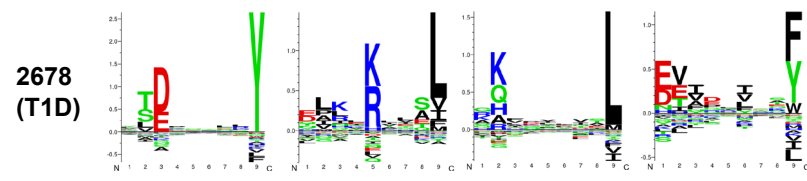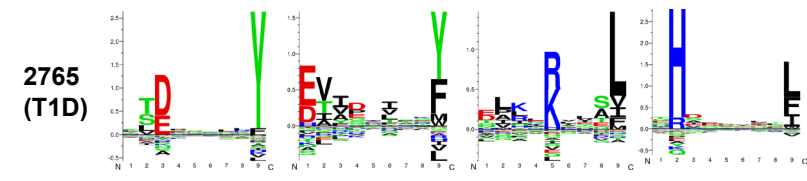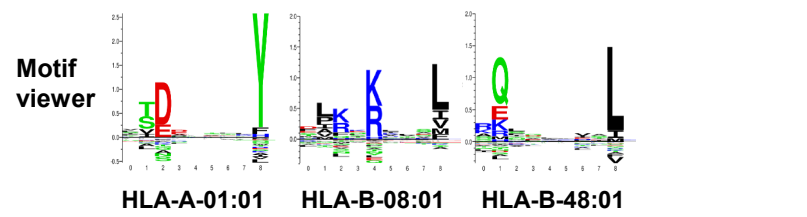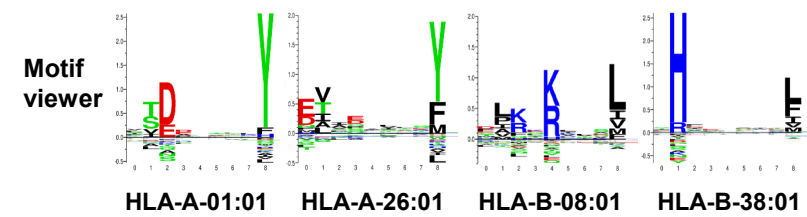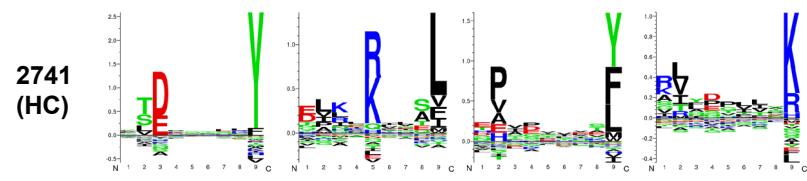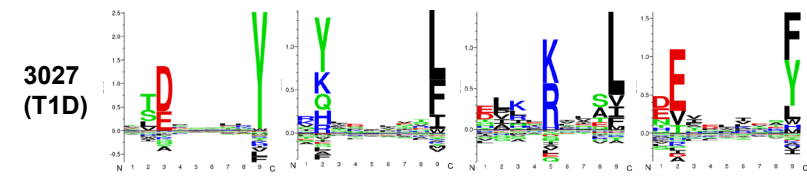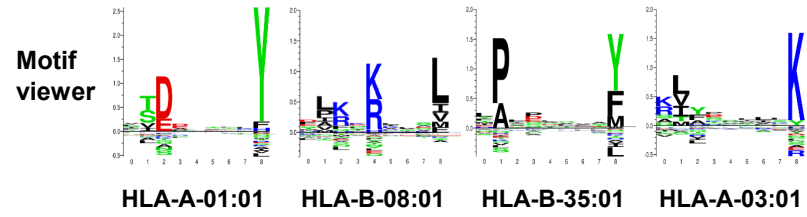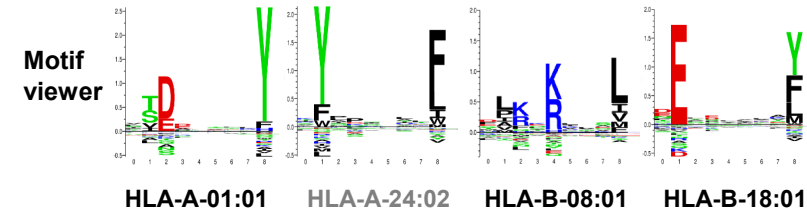

Fig. S12

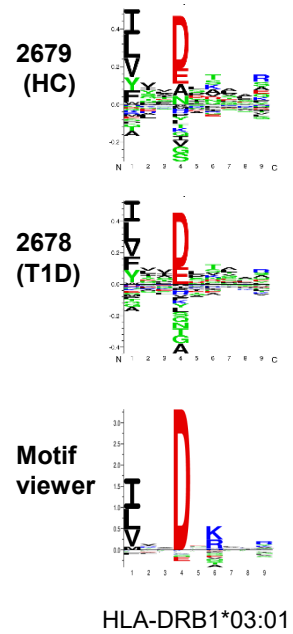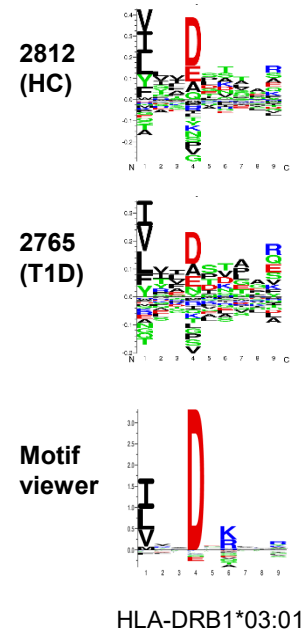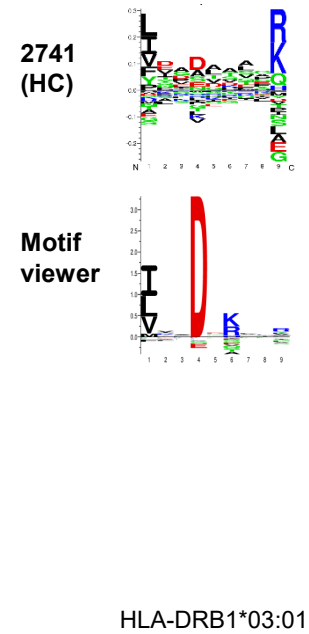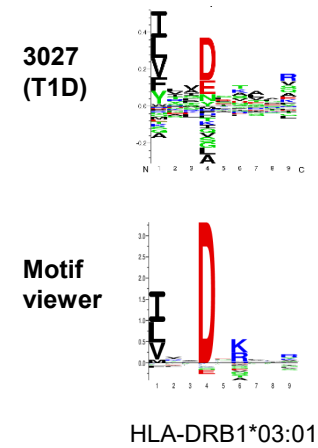

**Fig. S13**

| This study                                               |             | IEDB                     |                          |
|----------------------------------------------------------|-------------|--------------------------|--------------------------|
| Immunopeptide sequence                                   | Antigen     | Linear epitope           | MHC ligand assay         |
| <b>Identified during HLA-I immunopeptide enrichment</b>  |             |                          |                          |
| ETVWHLEEF                                                | HLA-DPA1    | Reported                 | Positive                 |
| QSEAGSHTLQWMY                                            | HLA-B       | Reported                 | Positive                 |
| <b>Identified during HLA-II immunopeptide enrichment</b> |             |                          |                          |
| AQGALANIAVDKANLE                                         | HLA-DRA     | Reported                 | Positive                 |
| DDTQFVRFSDAASPREEPR                                      | HLA-B       | Reported                 | Positive                 |
| DDTQFVRFSDAASPRGEP                                       | HLA-C       | Reported                 | Positive                 |
| DDTQFVRFSDAASPRGEP                                       | HLA-C       | Reported                 | Positive                 |
| DDTQFVRFSDAASQKMEPR                                      | HLA-A       | Reported                 | Positive                 |
| DDTQFVRFSDAASQRMPEPR                                     | HLA-A       | Reported                 | Positive                 |
| DGTQFVRFSDAASPRTEPRAP                                    | HLA-B       | No information available | No information available |
| LANIAVDKANLEIMT                                          | HLA-DRA     | Reported                 | Positive                 |
| LRSWTAADTAAQITQR                                         | HLA-B;HLA-C | Reported                 | Positive                 |
| LRSWTAVDTAAQISEQ                                         | HLA-E       | Reported                 | Positive                 |
| TQFVRFSDAASPRTEP                                         | HLA-B       | Reported                 | Positive                 |
| TQFVRFSDAASPRTEPR                                        | HLA-B       | Reported                 | Positive                 |
| TQFVRFSDAASQRMPEPR                                       | HLA-A       | Reported                 | Positive                 |
| VDDTQFVRFSDAASQKMEPRAPW                                  | HLA-A       | No information available | No information available |
